# Supplementary material for: エンドトキシン吸着療法(PMX) (特集 間質性肺炎治療法の新展開)
Source: eLife journal article supplement (doi:10.7554/elife.61459), 2010-04-01
Supplement: supp [file elife-61459-supp-v1.zip]

Archive with 43 entries (43 files):
- elife_poa_e61459_Figure_1_figure_supplement_1.pdf
- elife_poa_e61459_Figure_2_figure_supplement_1.pdf
- elife_poa_e61459_Figure_2_figure_supplement_2.pdf
- elife_poa_e61459_Figure_3_figure_supplement_1.pdf
- elife_poa_e61459_Figure_4_figure_supplement_1.pdf
- elife_poa_e61459_Figure_5_figure_supplement_1.pdf
- elife_poa_e61459_Figure_5_figure_supplement_2.pdf
- elife_poa_e61459_Figure_5_figure_supplement_3.pdf
- elife_poa_e61459_Figure_6_figure_supplement_1.pdf
- elife_poa_e61459_Figure_7_figure_supplement_1.pdf
- elife_poa_e61459_Figure_7_figure_supplement_2.pdf
- elife_poa_e61459_Appendix_1_figure_1.pdf
- elife_poa_e61459_Appendix_1_figure_2.pdf
- elife_poa_e61459_Appendix_1_figure_3.pdf
- elife_poa_e61459_Transparent_Reporting_File.docx
- elife_poa_e61459_Figure_1_source_data_1.xlsx
- elife_poa_e61459_Figure_1_figure_supplement_1_source_data_1.xlsx
- elife_poa_e61459_Figure_1_figure_supplement_1_source_data_2.xlsx
- elife_poa_e61459_Figure_2_source_data_1.xlsx
- elife_poa_e61459_Figure_2_figure_supplement_1_source_data_1.xlsx
- elife_poa_e61459_Figure_2_figure_supplement_1_source_data_2.xlsx
- elife_poa_e61459_Figure_3_source_data_1.xlsx
- elife_poa_e61459_Figure_3_source_data_2.xlsx
- elife_poa_e61459_Figure_3_source_data_3.xlsx
- elife_poa_e61459_Figure_4_source_data_1.xlsx
- elife_poa_e61459_Figure_4_source_data_2.xlsx
- elife_poa_e61459_Figure_4_source_data_3.xlsx
- elife_poa_e61459_Figure_4_figure_supplement_1_source_data_1.xlsx
- elife_poa_e61459_Figure_5_source_data_1.xlsx
- elife_poa_e61459_Figure_5_source_data_2.xlsx
- elife_poa_e61459_Figure_5_source_data_3.xlsx
- elife_poa_e61459_Figure_5_figure_supplement_1_source_data_1.xlsx
- elife_poa_e61459_Figure_5_figure_supplement_2_source_data_1.xlsx
- elife_poa_e61459_Figure_5_figure_supplement_3_source_data_1.xlsx
- elife_poa_e61459_Figure_6_source_data_1.xlsx
- elife_poa_e61459_Figure_7_source_data_1.xlsx
- elife_poa_e61459_Figure_7_figure_supplement_2_source_data_1.xlsx
- elife_poa_e61459_Supplementary_file_1.xlsx
- elife_poa_e61459_Supplementary_file_2.xlsx
- elife_poa_e61459_Supplementary_file_3.xlsx
- elife_poa_e61459_Appendix_1_figure_1_source_data_1.xlsx
- elife_poa_e61459_Appendix_1_figure_2_source_data_1.xlsx
- elife_poa_e61459_Appendix_1_figure_3_source_data_1.xlsx
