# Supplementary material for: エンドトキシン吸着療法(PMX) (特集 間質性肺炎治療法の新展開)
Source: eLife journal article supplement (doi:10.7554/elife.61459), 2010-04-01
Supplement: supp [file elife-61459-supp-v1.zip › elife_poa_e61459_Appendix_1_figure_1_source_data_1.xlsx]

## Sheet: Data
Appendix 1-figure 1-Source Data 1: GLP-4 is required in multiple tissues to regulate adult reproductive plasticity.
CON
Strain	Mean brood size	Maximum brood size	Minimum brood size	Standard Error of Mean	Number of biological replicates	Total sample size
N2	265.3	344	167	7.433	3	29
SS104 glp-4(bn2)	185.6	283	67	7.044	4	40
SH357 glp-4(bn2); pdrSi1 [Pglp-4::glp-4 cDNA::gfp::glp-4 3'UTR; unc-119(+)] II	218.4	317	11	9.082	4	39
SH368 glp-4(bn2) I; pdrSi2 [Pnhx-2::glp-4 cDNA::gfp::glp-4 3'UTR; unc-119(+)] II	201.2	288	40	8.342	4	40
SH369 glp-4(bn2) I; pdrSi3 [Pzfp-2::glp-4 cDNA::gfp::glp-4 3'UTR; unc-119(+)] II	193.8	279	64	7.247	4	40
SH370 glp-4(bn2) I; pdrSi4 [Ppgl-1::glp-4 cDNA::gfp::glp-4 3'UTR; unc-119(+)] II	112.8	197	14	6.229	4	40
PDstv
Strain	Mean brood size	Maximum brood size	Minimum brood size	Standard Error of Mean	Number of biological replicates	Total sample size
N2	242.7	320	145	8.605	3	30
SS104 glp-4(bn2)	253.2	375	185.6	7.126	4	39
SH357 glp-4(bn2); pdrSi1 [Pglp-4::glp-4 cDNA::gfp::glp-4 3'UTR; unc-119(+)] II	241	329	63	9.524	4	40
SH368 glp-4(bn2) I; pdrSi2 [Pnhx-2::glp-4 cDNA::gfp::glp-4 3'UTR; unc-119(+)] II	248.6	351	94	8.741	4	40
SH369 glp-4(bn2) I; pdrSi3 [Pzfp-2::glp-4 cDNA::gfp::glp-4 3'UTR; unc-119(+)] II	232.3	298	91	7.423	4	39
SH370 glp-4(bn2) I; pdrSi4 [Ppgl-1::glp-4 cDNA::gfp::glp-4 3'UTR; unc-119(+)] II	151.1	296	15	8.422	4	39
Brood size
N2 CON	N2 PDstv	SS104 glp-4(bn2) CON	SS104 glp-4(bn2) PDstv	SH357 glp-4(bn2); pdrSi1 [Pglp-4::glp-4 cDNA::gfp::glp-4 3'UTR; unc-119(+)] II CON	SH357 glp-4(bn2); pdrSi1 [Pglp-4::glp-4 cDNA::gfp::glp-4 3'UTR; unc-119(+)] II PDstv	SH368 glp-4(bn2) I; pdrSi2 [Pnhx-2::glp-4 cDNA::gfp::glp-4 3'UTR; unc-119(+)] II CON	SH368 glp-4(bn2) I; pdrSi2 [Pnhx-2::glp-4 cDNA::gfp::glp-4 3'UTR; unc-119(+)] II PDstv	SH369 glp-4(bn2) I; pdrSi3 [Pzfp-2::glp-4 cDNA::gfp::glp-4 3'UTR; unc-119(+)] II CON	SH369 glp-4(bn2) I; pdrSi3 [Pzfp-2::glp-4 cDNA::gfp::glp-4 3'UTR; unc-119(+)] II PDstv	SH370 glp-4(bn2) I; pdrSi4 [Ppgl-1::glp-4 cDNA::gfp::glp-4 3'UTR; unc-119(+)] II CON	SH370 glp-4(bn2) I; pdrSi4 [Ppgl-1::glp-4 cDNA::gfp::glp-4 3'UTR; unc-119(+)] II PDstv
238	320	221	206	317	269	228	236	205	219	115	118
263	225	178	149	154	203	142	304	244	142	114	121
236	145	115	213	244	237	210	262	162	298	60	142
306	304	235	236	215	314	167	116	249	253	115	164
303	251	202	289	114	174	214	314	170	197	128	107
297	242	227	254	279	193	163	280	174	281	122	92
268	241	144	261	230	206	214	124	188	184	89	162
239	317	156	253	264	63	147	272	219	248	98	121
269	231	179	247	250	168	237	263	208	242	86	102
242	286	184	292	193	181	199	94	191	201	166	41
287	236	148	242	189	197	268	234	219	219	100	220
296	220	226	277	231	263	210	263	229	174	94	201
235	264	133	265	200	184	187	168	132	232	39	169
310	183	165	277	11	259	190	235	109	230	136	214
183	199	113	375	290	297	273	232	64	267	109	127
272	155	242	253	274	104	121	184	178	209	172	56
243	271	178	270	243	170	40	230	188	128	132	165
275	217	105	302	213	196	188	246	157	287	93	191
234	193	114	281	249	274	233	192	107	247	110	203
303	275	209	313	252	282	214	273	162	233	76	152
263	252	207	209	226	276	218	297	232	220	197	135
288	312	199	210	160	319	189	259	236	269	87	15
167	218	214	225	158	225	240	233	218	242	101	194
272	301	225	252	265	232	265	301	172	211	150	146
344	302	185	242	277	273	218	290	158	295	152	204
215	178	155	145	204	263	233	262	241	262	85	219
230	247	283	302	232	273	288	325	279	247	100	188
310	243	67	252	156	277	243	251	245	258	98	142
305	248	196	236	211	288	257	351	191	250	179	171
	205	222	298	211	320	211	239	199	246	119	91
		199	193	139	260	121	276	179	295	110	151
		226	200	269	291	242	264	265	298	115	158
		164	277	235	234	182	263	207	231	108	152
		252	286	216	293	200	236	158	225	175	157
		198	293	215	329	111	249	265	255	85	176
		207	236	268	165	283	265	145	91	51	121
		178	290	177	247	204	192	214	169	103	162
		168	260	277	310	226	326	196	254	14	296
		202	213	208	301	161	243	222	252	185	147
		202			231	112	298	175		144

## Sheet: Statistical analysis
Statistical analysis
Šídák's multiple comparisons test	Mean Diff.	95.00% CI of diff.	Below threshold?	Summary	Adjusted P Value
N2 CON vs. N2 PDStv	22.58	-11.45 to 56.60	No	ns	0.3944
glp-4(bn2) CON vs. glp-4(bn2) PDStv	-67.6	-97.01 to -38.20	Yes	****	<0.0001
glp-4; Pglp-4::glp-4 CON vs. glp-4; Pglp-4::glp-4 PDStv	-22.67	-52.07 to 6.735	No	ns	0.2279
glp-4; Pnhx-2::glp-4 (intestine) CON vs. glp-4; Pnhx-2::glp-4 (intestine) PDStv	-47.33	-76.54 to -18.11	Yes	***	0.0001
glp-4; Pzfp-2::glp-4 (somatic gonad) CON vs. glp-4; Pzfp-2::glp-4 (somatic gonad) PDStv	-38.53	-67.93 to -9.132	Yes	**	0.0035
glp-4; Ppgl-1::glp-4 (germ line) CON vs. glp-4; Ppgl-1::glp-4 (germ line) PDStv	-38.3	-67.70 to -8.901	Yes	**	0.0038
N2 CON vs. glp-4(bn2) CON	79.7	48.60 to 110.8	Yes	****	<0.0001
N2 CON vs. glp-4; Pglp-4::glp-4 CON	46.92	15.64 to 78.19	Yes	***	0.0006
N2 CON vs. glp-4; Pnhx-2::glp-4 (intestine) CON	64.05	32.95 to 95.16	Yes	****	<0.0001
N2 CON vs. glp-4; Pzfp-2::glp-4 (somatic gonad) CON	71.48	40.37 to 102.6	Yes	****	<0.0001
N2 CON vs. glp-4; Ppgl-1::glp-4 (germ line) CON	152.5	121.4 to 183.6	Yes	****	<0.0001
N2 PDStv vs. glp-4(bn2) PDStv	-10.48	-41.45 to 20.49	No	ns	0.9107
N2 PDStv vs. glp-4; Pglp-4::glp-4 PDStv	1.675	-29.13 to 32.48	No	ns	>0.9999
N2 PDStv vs. glp-4; Pnhx-2::glp-4 (intestine) PDStv	-5.85	-36.65 to 24.95	No	ns	0.9925
N2 PDStv vs. glp-4; Pzfp-2::glp-4 (somatic gonad) PDStv	10.37	-20.60 to 41.34	No	ns	0.9144
N2 PDStv vs. glp-4; Ppgl-1::glp-4 (germ line) PDStv	91.6	60.63 to 122.6	Yes	****	<0.0001
glp-4(bn2) CON vs. glp-4; Pglp-4::glp-4 CON	-32.78	-60.61 to -4.960	Yes	*	0.0134
glp-4(bn2) CON vs. glp-4; Pnhx-2::glp-4 (intestine) CON	-15.65	-43.30 to 12.00	No	ns	0.4963
glp-4(bn2) CON vs. glp-4; Pzfp-2::glp-4 (somatic gonad) CON	-8.225	-35.87 to 19.42	No	ns	0.9132
glp-4(bn2) CON vs. glp-4; Ppgl-1::glp-4 (germ line) CON	72.78	45.13 to 100.4	Yes	****	<0.0001
glp-4(bn2) PDStv vs. glp-4; Pglp-4::glp-4 PDStv	12.15	-15.67 to 39.98	No	ns	0.724
glp-4(bn2) PDStv vs. glp-4; Pnhx-2::glp-4 (intestine) PDStv	4.629	-23.19 to 32.45	No	ns	0.9892
glp-4(bn2) PDStv vs. glp-4; Pzfp-2::glp-4 (somatic gonad) PDStv	20.85	-7.154 to 48.85	No	ns	0.23
glp-4(bn2) PDStv vs. glp-4; Ppgl-1::glp-4 (germ line) PDStv	102.1	74.08 to 130.1	Yes	****	<0.0001
