# Supplementary material for: エンドトキシン吸着療法(PMX) (特集 間質性肺炎治療法の新展開)
Source: eLife journal article supplement (doi:10.7554/elife.61459), 2010-04-01
Supplement: supp [file elife-61459-supp-v1.zip › elife_poa_e61459_Appendix_1_figure_2_source_data_1.xlsx]

## Sheet: Data
Appendix 1-figure 2-Source Data 1: Total, mitotic, and meiotic cell rows in control and PDStv animals in wild type and kri-1(ok1254)
Total cell rows					Mitotic cell rows					Meiotic cell rows
N2 CON	N2 PDstv	kri-1(ok1251) CON	kri-1(ok1251) PDstv		N2 CON	N2 PDstv	kri-1(ok1251) CON	kri-1(ok1251) PDstv		N2 CON	N2 PDstv	kri-1(ok1251) CON	kri-1(ok1251) PDstv
35	16	19	12		24	12	15	7		11	4	4	5
23	20	17	18		13	16	14	13		10	4	3	5
28	21	19	18		14	15	13	13		14	6	6	5
22	19	24	20		15	13	17	13		7	6	7	7
26	24	21	19		12	17	16	13		14	7	5	6
21	18	19	18		12	13	14	15		9	5	5	3
28	22	20	19		14	16	14	14		14	6	6	5
21	18	19	17		13	12	13	14		8	6	6	3
27	19	19	17		17	15	15	15		10	4	4	2
21	18	21	17		15	14	14	13		6	4	7	4
25	20	22	17		13	11	14	14		12	9	8	3
24	18	23	17		18	15	17	14		6	3	6	3
24	21	22	19		14	14	16	12		10	7	6	7
28	23	21	23		17	13	17	11		11	10	4	12
23	16	19	20		13	11	14	15		10	5	5	5
25	21	15	22		11	16	12	12		14	5	3	10
24	20	18	20		14	13	12	14		10	7	6	6
27	18	16	22		15	13	14	15		12	5	2	7
27	16	17	20		15	15	12	15		12	1	5	5
23	18	16	18		14	14	15	14		9	4	1	4
25	17	19	18		15	13	14	15		10	4	5	3
21	20	21	15		17	15	13	12		4	5	8	3
26	17	20	21		17	13	16	16		9	4	4	5
26	21	18	20		14	16	15	15		12	5	3	5
24	19	21	20		15	15	14	13		9	4	7	7
26	19	21	20		13	15	15	11		13	4	6	9
24	21	21	25		13	16	14	14		11	5	7	11
21	16	17	12		16	16	12	12		5	0	5	0
19	19	15	23		15	14	15	15		4	5	0	8
23	18	28	18		15	13	16	14		8	5	12	4
22	18	17	19		14	12	12	14		8	6	5	5
26	15	17	18		12	15	13	14		14	0	4	4
22	20	19	16		15	14	14	11		7	6	5	5
17	13	18	17		14	13	12	13		3	0	6	4
21	24	20	16		14	16	14	11		7	8	6	5
24	19	23	16		14	12	9	12		10	7	14	4
26	19	20	19		15	16	14	16		11	3	6	3
24	18	20	18		14	15	15	15		10	3	5	3
23	25	21	20		13	14	7	14		10	11	14	6
27	19	18	22		16	14	12	16		11	5	6	6
24	18	19	18		14	13	12	18		10	5	7	0
22	20	20	17		13	16	12	14		9	4	8	3
25	25	24	18		14	15	9	12		11	10	15	6
23	22	22	14		13	14	11	14		10	8	11	0
23	22	20	23		14	15	12	18		9	7	8	5
24	21	19	16		13	11	12	13		11	10	7	3
32	19	18	15		19	16	13	15		13	3	5	0
18	19	17	19		11	12	11	14		7	7	6	5
33	21	21	17		15	16	14	14		18	5	7	3
27	17	19	20		15	13	12	15		12	4	7	5
26	13	18	20		15	10	6	14		11	3	12	6
25	17	22	19		12	13	16	11		13	4	6	8
23	21	22	19		16	15	12	14		7	6	10	5
19	18	18	22		11	13	13	15		8	5	5	7
27	15	19	23		14	14	11	15		13	1	8	8
29	22	17	21		13	15	13	16		16	7	4	5
22	19	17	19		14	13	14	14		8	6	3	5
25	22	19	17		14	16	13	15		11	6	6	2
24	22	17	26		16	15	13	14		8	7	4	12
21	18	17	23		16	15	12	17		5	3	5	6
24	14	19	21		15	14	13	15		9	0	6	6
17	16	20	21		10	11	12	11		7	5	8	10
22	14	18	25		13	14	13	17		9	0	5	8
21	14	18	19		13	14	14	16		8	0	4	3
26	17	21	26		12	16	13	15		14	1	8	11
18	18	18	19		13	13	13	14		5	5	5	5
19	21	25	20		14	16	13	14		5	5	12	6
26	21	20	18		16	14	16	12		10	7	4	6
21	19	20	19		14	15	14	13		7	4	6	6
24	17	19	19		13	13	13	12		11	4	6	7
23	19	21	19		16	16	14	15		7	3	7	4
25	14	18	14		15	14	10	11		10	0	8	3
26	17	19	20		15	13	14	13		11	4	5	7
21	17	23	19		14	13	13	12		7	4	10	7
29	18	23	16		15	14	13	13		14	4	10	3
22	19	18	16		13	13	12	11		9	6	6	5
24	17	21	19		16	9	10	15		8	8	11	4
20	19	22	20		15	15	15	13		5	4	7	7
22	17	21	20		17	14	14	15		5	3	7	5
24	18	21	15		15	14	13	15		9	4	8	0
26	16	20	21		15	15	18	15		11	1	2	6
22	16	19	19		15	15	15	14		7	1	4	5
22	17	20	18		15	14	13	15		7	3	7	3
24	20	20	21		13	13	14	15		11	7	6	6
24	12		17		14	12		16		10	0		1
24	15		22		15	12		14		9	3		8
24	20				12	13				12	7
21	19				15	15				6	4
24	17				16	11				8	6
	16					15					1
	18					14					4
	17					17					0
	19					16					3
	16					13					3
	15					12					3
	14					14					0

## Sheet: Statistical analysis
Statistical analysis
Tukey's multiple comparisons test	Mean Diff.	95.00% CI of diff.	Below threshold?	Summary	Adjusted P Value
N2 CON vs. N2 PDStv	5.481	4.304 to 6.658	Yes	****	<0.0001
N2 CON vs. kri-1(ok1251) CON	4.245	3.028 to 5.462	Yes	****	<0.0001
N2 CON vs. kri-1(ok1251) PDStv	4.876	3.667 to 6.086	Yes	****	<0.0001
N2 CON vs. N2 CON	9.506	8.307 to 10.70	Yes	****	<0.0001
N2 CON vs. N2 PDStv	9.919	8.742 to 11.10	Yes	****	<0.0001
N2 CON vs. kri-1(ok1251) CON	10.59	9.373 to 11.81	Yes	****	<0.0001
N2 CON vs. kri-1(ok1251) PDStv	10.03	8.818 to 11.24	Yes	****	<0.0001
N2 CON vs. N2 CON	14.38	13.18 to 15.58	Yes	****	<0.0001
N2 CON vs. N2 PDStv	19.45	18.27 to 20.63	Yes	****	<0.0001
N2 CON vs. kri-1(ok1251) CON	17.54	16.33 to 18.76	Yes	****	<0.0001
N2 CON vs. kri-1(ok1251) PDStv	18.74	17.53 to 19.95	Yes	****	<0.0001
N2 PDStv vs. kri-1(ok1251) CON	-1.237	-2.432 to -0.04153	Yes	*	0.035
N2 PDStv vs. kri-1(ok1251) PDStv	-0.6054	-1.793 to 0.5823	No	ns	0.8817
N2 PDStv vs. N2 CON	4.024	2.847 to 5.201	Yes	****	<0.0001
N2 PDStv vs. N2 PDStv	4.438	3.283 to 5.592	Yes	****	<0.0001
N2 PDStv vs. kri-1(ok1251) CON	5.109	3.914 to 6.304	Yes	****	<0.0001
N2 PDStv vs. kri-1(ok1251) PDStv	4.546	3.358 to 5.733	Yes	****	<0.0001
N2 PDStv vs. N2 CON	8.901	7.724 to 10.08	Yes	****	<0.0001
N2 PDStv vs. N2 PDStv	13.97	12.81 to 15.12	Yes	****	<0.0001
N2 PDStv vs. kri-1(ok1251) CON	12.06	10.87 to 13.26	Yes	****	<0.0001
N2 PDStv vs. kri-1(ok1251) PDStv	13.26	12.07 to 14.44	Yes	****	<0.0001
kri-1(ok1251) CON vs. kri-1(ok1251) PDStv	0.6312	-0.5958 to 1.858	No	ns	0.875
kri-1(ok1251) CON vs. N2 CON	5.261	4.044 to 6.478	Yes	****	<0.0001
kri-1(ok1251) CON vs. N2 PDStv	5.674	4.479 to 6.869	Yes	****	<0.0001
kri-1(ok1251) CON vs. kri-1(ok1251) CON	6.345	5.111 to 7.580	Yes	****	<0.0001
kri-1(ok1251) CON vs. kri-1(ok1251) PDStv	5.782	4.555 to 7.009	Yes	****	<0.0001
kri-1(ok1251) CON vs. N2 CON	10.14	8.920 to 11.35	Yes	****	<0.0001
kri-1(ok1251) CON vs. N2 PDStv	15.21	14.01 to 16.40	Yes	****	<0.0001
kri-1(ok1251) CON vs. kri-1(ok1251) CON	13.3	12.06 to 14.53	Yes	****	<0.0001
kri-1(ok1251) CON vs. kri-1(ok1251) PDStv	14.49	13.26 to 15.72	Yes	****	<0.0001
kri-1(ok1251) PDStv vs. N2 CON	4.63	3.420 to 5.839	Yes	****	<0.0001
kri-1(ok1251) PDStv vs. N2 PDStv	5.043	3.855 to 6.231	Yes	****	<0.0001
kri-1(ok1251) PDStv vs. kri-1(ok1251) CON	5.714	4.487 to 6.941	Yes	****	<0.0001
kri-1(ok1251) PDStv vs. kri-1(ok1251) PDStv	5.151	3.931 to 6.371	Yes	****	<0.0001
kri-1(ok1251) PDStv vs. N2 CON	9.506	8.297 to 10.72	Yes	****	<0.0001
kri-1(ok1251) PDStv vs. N2 PDStv	14.57	13.39 to 15.76	Yes	****	<0.0001
kri-1(ok1251) PDStv vs. kri-1(ok1251) CON	12.67	11.44 to 13.89	Yes	****	<0.0001
kri-1(ok1251) PDStv vs. kri-1(ok1251) PDStv	13.86	12.64 to 15.08	Yes	****	<0.0001
N2 CON vs. N2 PDStv	0.4133	-0.7638 to 1.590	No	ns	0.9922
N2 CON vs. kri-1(ok1251) CON	1.084	-0.1324 to 2.301	No	ns	0.1356
N2 CON vs. kri-1(ok1251) PDStv	0.5216	-0.6880 to 1.731	No	ns	0.9611
N2 CON vs. N2 CON	4.876	3.677 to 6.076	Yes	****	<0.0001
N2 CON vs. N2 PDStv	9.945	8.767 to 11.12	Yes	****	<0.0001
N2 CON vs. kri-1(ok1251) CON	8.037	6.820 to 9.254	Yes	****	<0.0001
N2 CON vs. kri-1(ok1251) PDStv	9.231	8.021 to 10.44	Yes	****	<0.0001
N2 PDStv vs. kri-1(ok1251) CON	0.6711	-0.5239 to 1.866	No	ns	0.7958
N2 PDStv vs. kri-1(ok1251) PDStv	0.1083	-1.079 to 1.296	No	ns	>0.9999
N2 PDStv vs. N2 CON	4.463	3.286 to 5.640	Yes	****	<0.0001
N2 PDStv vs. N2 PDStv	9.531	8.377 to 10.69	Yes	****	<0.0001
N2 PDStv vs. kri-1(ok1251) CON	7.624	6.428 to 8.819	Yes	****	<0.0001
N2 PDStv vs. kri-1(ok1251) PDStv	8.818	7.630 to 10.01	Yes	****	<0.0001
kri-1(ok1251) CON vs. kri-1(ok1251) PDStv	-0.5628	-1.790 to 0.6642	No	ns	0.94
kri-1(ok1251) CON vs. N2 CON	3.792	2.575 to 5.009	Yes	****	<0.0001
kri-1(ok1251) CON vs. N2 PDStv	8.86	7.665 to 10.06	Yes	****	<0.0001
kri-1(ok1251) CON vs. kri-1(ok1251) CON	6.952	5.718 to 8.187	Yes	****	<0.0001
kri-1(ok1251) CON vs. kri-1(ok1251) PDStv	8.146	6.919 to 9.374	Yes	****	<0.0001
kri-1(ok1251) PDStv vs. N2 CON	4.355	3.145 to 5.564	Yes	****	<0.0001
kri-1(ok1251) PDStv vs. N2 PDStv	9.423	8.235 to 10.61	Yes	****	<0.0001
kri-1(ok1251) PDStv vs. kri-1(ok1251) CON	7.515	6.288 to 8.742	Yes	****	<0.0001
kri-1(ok1251) PDStv vs. kri-1(ok1251) PDStv	8.709	7.489 to 9.929	Yes	****	<0.0001
N2 CON vs. N2 PDStv	5.068	3.891 to 6.245	Yes	****	<0.0001
N2 CON vs. kri-1(ok1251) CON	3.16	1.944 to 4.377	Yes	****	<0.0001
N2 CON vs. kri-1(ok1251) PDStv	4.354	3.145 to 5.564	Yes	****	<0.0001
N2 PDStv vs. kri-1(ok1251) CON	-1.908	-3.103 to -0.7127	Yes	****	<0.0001
N2 PDStv vs. kri-1(ok1251) PDStv	-0.7137	-1.901 to 0.4740	No	ns	0.715
kri-1(ok1251) CON vs. kri-1(ok1251) PDStv	1.194	-0.03300 to 2.421	No	ns	0.0651
