# Supplementary material for: エンドトキシン吸着療法(PMX) (特集 間質性肺炎治療法の新展開)
Source: eLife journal article supplement (doi:10.7554/elife.61459), 2010-04-01
Supplement: supp [file elife-61459-supp-v1.zip › elife_poa_e61459_Appendix_1_figure_3_source_data_1.xlsx]

## Sheet: Data
Appendix 1-figure 3-Source Data 1: Decreased fecundity in postdauer animals results from a reduction of sperm available for self-fertilization.
Strain	Mean brood size	Maximum brood size	Minimum brood size	Standard Error of Mean	Number of biological replicates	Total sample size
N2 CON ⚥ self	328.9	485	181	8.74	4	42
N2 CON ♂ x N2 CON ⚥	689.8	870	33	29.69	4	35
N2 PDstv ⚥ self	275.2	383	0	16.23	4	40
N2 CON ♂ x N2 PDstv ⚥	754.3	1013	227	27.12	4	37
Brood size
N2 CON ⚥ self	N2 CON ♂ x N2 CON ⚥	N2 PDstv ⚥ self	N2 CON ♂ x N2 PDstv ⚥
270	762	301	704
181	640	321	749
395	628	359	764
413	862	264	634
373	870	340	566
337	752	329	620
375	678	323	1013
407	759	305	736
343	696	367	925
346	499	317	677
238	779	344	690
362	33	352	872
369	621	323	413
301	789	311	760
287	727	289	989
339	778	319	227
310	829	340	857
360	784	140	976
277	687	290	748
324	851	132	755
325	779	303	823
342	605	291	680
372	722	328	1009
414	268	342	845
320	833	383	724
382	799	314	991
322	852	295	916
348	804	200	875
485	808	246	801
342	434	346	596
335	617	2	851
252	806	46	716
289	550	319	612
284	521	318	656
328	720	340	661
309		282	842
236		282	636
337		0
267		0
258		306
300
359

## Sheet: Statistical analysis
Statistical analysis
Unpaired t test	PDStv ⚥ self vs. CON ⚥ self	CON ♂ vs. CON ⚥ self x CON ⚥	CON ♂ vs. PDStv ⚥ self x PDStv ⚥
P value	0.0042	<0.0001	<0.0001
P value summary	**	****	****
Significantly different (P < 0.05)?	Yes	Yes	Yes
One- or two-tailed P value?	Two-tailed	Two-tailed	Two-tailed
t, df	t=2.950, df=80	t=12.57, df=75	t=15.43, df=75
