# Supplementary material for: エンドトキシン吸着療法(PMX) (特集 間質性肺炎治療法の新展開)
Source: eLife journal article supplement (doi:10.7554/elife.61459), 2010-04-01
Supplement: supp [file elife-61459-supp-v1.zip › elife_poa_e61459_Figure_1_figure_supplement_1_source_data_1.xlsx]

## Sheet: Data
Figure 1-figure supplement 1-Source Data 1: Brood size comparison between PDStv grown in the presence of delta7-dafachronic acid (PDStv + DA) and PDStv grown in the absence of (delta7-DA (PDStv - DA).
PDstv
Strain	Mean brood size	Maximum brood size	Minimum brood size	Standard Error of Mean	Number of biological replicates	Total sample size
N2	189.6	317	32	10.54	4	40
RG1228 daf-9(rh50)	239.5	349	0	9.693	4	40
AA292 daf-36(k114)	250.4	350	0	10.72	4	40
CF2052 kri-1(ok1251)	147.5	274	0	10.47	4	40
CF2167 tcer-1(tm1452)	136.5	242	0	10.81	4	40
PDstv + DA
Strain	Mean brood size	Maximum brood size	Minimum brood size	Standard Error of Mean	Number of biological replicates	Total sample size
N2	190	286	52	9.17	4	39
RG1228 daf-9(rh50)	180.8	285	0	12.87	4	37
AA292 daf-36(k114)	254.8	333	2	10.21	4	38
CF2052 kri-1(ok1251)	128.5	246	28	9.115	4	40
CF2167 tcer-1(tm1452)	135.7	242	11	10.07	4	40
Brood size
N2 PDstv	N2 PDstv + DA	RG1228 daf-9(rh50) PDstv	RG1228 daf-9(rh50) PDstv + DA	AA292 daf-36(k114) PDstv	AA292 daf-36(k114) PDstv + DA	CF2052 kri-1(ok1251) PDstv	CF2052 kri-1(ok1251) PDstv + DA	CF2167 tcer-1(tm1452) PDstv	CF2167 tcer-1(tm1452) PDstv + DA
231	237	234	60	144	170	122	246	222	183
134	247	236	166	350	282	274	202	151	171
188	162	174	162	301	300	130	222	114	33
167	83	214	242	273	174	155	202	113	76
154	193	249	260	271	234	139	220	165	228
161	198	203	221	270	172	56	68	157	207
66	276	349	202	276	239	169	180	0	199
208	256	234	195	311	333	111	189	219	241
272	225	273	271	150	251	248	164	222	154
243	162	156	173	180	238	1	131	179	197
306	52	348	229	250	190	58	106	202	40
290	151	243	0	201	2	49	141	121	131
132	210	206	285	275	178	153	159	242	62
314	142	190	151	216	281	102	56	159	185
305	166	253	0	210	262	235	103	2	240
208	268	288	208	270	310	157	126	7	190
176	151	258	143	205	331	0	51	106	166
32	157	208	174	328	202	237	103	150	129
160	286	267	210	321	267	120	63	225	110
197	253	281	12	266	229	119	136	146	179
242	121	312	266	288	325	213	89	27	202
167	145	164	284	111	288	235	92	213	128
144	164	281	0	229	265	212	54	210	91
166	128	245	194	286	320	189	152	114	84
244	161	183	176	263	279	136	29	186	152
230	242	286	274	282	286	132	30	126	11
173	242	265	192	267	243	167	28	148	242
235	179	278	201	133	268	196	148	178	192
118	257	261	250	0	255	117	75	154	101
107	130	251	124	284	286	229	129	141	161
195	111	277	191	307	332	75	154	174	171
159	150	204	239	287	283	134	165	163	75
172	233	266	179	296	304	122	104	0	98
317	188	270	206	288	330	62	187	138	103
174	259	269	149	287	239	129	126	83	90
169	153	240	204	238	252	168	149	4	133
179	217	186	196	309	231	171	114	111	80
227	195	316		271	253	161	110	173	15
80	261	160		255		171	112	59	74
143		0		265		244	223	156	103

## Sheet: Statistical analysis
Statistical analysis
Šídák's multiple comparisons test	Mean Diff.	95.00% CI of diff.	Below threshold?	Summary	Adjusted P Value
N2 PDStv vs. N2 PDStv + DA	-0.4006	-38.27 to 37.47	No	ns	>0.9999
daf-9(rh50) PDStv vs. daf-9(rh50) PDStv + DA	58.67	20.28 to 97.05	Yes	***	0.0005
daf-36(k114) PDStv vs. daf-36(k114) PDStv + DA	-4.492	-42.62 to 33.63	No	ns	0.9992
kri-1(ok1251) PDStv vs. kri-1(ok1251) PDStv + DA	19	-18.63 to 56.63	No	ns	0.6582
tcer-1(tm1425) PDStv vs. tcer-1(tm1425) PDStv + DA	0.825	-36.81 to 38.46	No	ns	>0.9999
