# Supplementary material for: エンドトキシン吸着療法(PMX) (特集 間質性肺炎治療法の新展開)
Source: eLife journal article supplement (doi:10.7554/elife.61459), 2010-04-01
Supplement: supp [file elife-61459-supp-v1.zip › elife_poa_e61459_Figure_1_figure_supplement_1_source_data_2.xlsx]

## Sheet: Data
Figure 1-figure supplement 1-Source Data 2: Brood size comparison of PDStv relative to CON.
CON
Strain	Mean brood size	Maximum brood size	Minimum brood size	Standard Error of Mean	Number of biological replicates	Total sample size
N2	307.5	367	223	5.954	4	40
SH351 kri-1(ok1251); daf-12(rh284)	0.1667	5	0	0.1667	3	30
SH353 tcer-1(tm1452); daf-12(rh284)	20.2	122	0	5.889	3	30
SH352 kri-1(ok1251); daf-12(rh285)	18	73	0	4.156	3	30
SH354 tcer-1(tm1452); daf-12(rh285)	30.73	99	0	4.173	3	30
PDstv
Strain	Mean brood size	Maximum brood size	Minimum brood size	Standard Error of Mean	Number of biological replicates	Total sample size
N2	240	393	68	11.54	4	40
SH351 kri-1(ok1251); daf-12(rh284)	77.17	184	0	10.08	3	30
SH353 tcer-1(tm1452); daf-12(rh284)	96.4	200	0	9.784	3	30
SH352 kri-1(ok1251); daf-12(rh285)	53.36	146	0	8.052	3	30
SH354 tcer-1(tm1452); daf-12(rh285)	48.19	152	0	7.542	3	30
Brood size
N2 CON	N2 PDstv	SH351 kri-1(ok1251); daf-12(rh284) CON	SH351 kri-1(ok1251); daf-12(rh284) PDstv	SH353 tcer-1(tm1452); daf-12(rh284) CON	SH353 tcer-1(tm1452); daf-12(rh284) PDstv	SH352 kri-1(ok1251); daf-12(rh285) CON	SH352 kri-1(ok1251); daf-12(rh285) PDstv	SH354 tcer-1(tm1452); daf-12(rh285) CON	SH354 tcer-1(tm1452); daf-12(rh285) PDstv
321	283	0	111	0	73	6	39	48	94
367	339	0	0	0	81	38	6	33	116
239	190	0	121	59	137	34	50	0	0
316	175	0	17	7	172	1	70	0	35
317	389	0	5	0	185	52	105	0	113
321	234	0	13	0	162	5	63	43	152
248	393	0	0	10	90	26	70	25	78
323	302	0	184	0	0	7	82	57	68
346	260	0	2	0	110	12	73	0	82
352	359	1	0	0	84	1	45	29	0
341	134	0	149	59	116	73	0	14	6
367	290	0	113	0	200	3	0	60	35
306	93	0	143	29	160	23	61	9	63
356	253	0	164	26	24	0	68	0	116
336	238	0	31	83	142	0	0	1	62
320	264	0	138	54	140	0	0	92	30
321	246	0	92	39	99	26	0	87	16
261	202	0	37	84	145	5	39	1	0
296	295	0	75	122	161	0	146	54	53
276	121	1	98	2	78	0	79	42	108
300	218	0	142	3	65	0	95	99	60
308	212	0	28	0	80	0	96	13	18
223	220	0	81	0	64	72	0	49	0
249	68	0	129	21	50	23	47	24	35
247	141	0	70	0	26	11	26	25	42
305	195	0	63	0	44	3	109	16	8
309	181	0	87	8	54	38	1	18	75
296	244	0	45	0	17	13	124	6	48
351	195	0	83	0	66	67		32	0
295	263	5	94	0	67	1		15	29
320	190
226	262
320	311
310	271
299	291
349	248
345	191
313	252
327	266
279	320

## Sheet: Statistical analysis
Statistical analysis
Šídák's multiple comparisons test	Mean Diff.	95.00% CI of diff.	Below threshold?	Summary	Adjusted P Value
N2 CON vs. N2 PDStv	67.55	41.96 to 93.14	Yes	****	<0.0001
kri-1(ok1251); daf-12(rh284) CON vs. kri-1(ok1251); daf-12(rh284) PDStv	-76.93	-106.5 to -47.39	Yes	****	<0.0001
tcer-1(tm1452); daf-12(rh284) CON vs. tcer-1(tm1452); daf-12(rh284) PDStv	-76.2	-105.7 to -46.65	Yes	****	<0.0001
kri-1(ok1251); daf-12(rh285) CON vs. kri-1(ok1251); daf-12(rh285) PDStv	-35.36	-65.43 to -5.287	Yes	*	0.0128
tcer-1(tm1452); daf-12(rh285) CON vs. tcer-1(tm1452); daf-12(rh285) PDStv	-21.67	-51.21 to 7.881	No	ns	0.2621
