# Supplementary material for: エンドトキシン吸着療法(PMX) (特集 間質性肺炎治療法の新展開)
Source: eLife journal article supplement (doi:10.7554/elife.61459), 2010-04-01
Supplement: supp [file elife-61459-supp-v1.zip › elife_poa_e61459_Figure_1_source_data_1.xlsx]

## Sheet: Data
Figure 1-Source Data 1: Dafachronic acid-dependent DAF-12 signaling is required for decreased fecundity after starvation-induced dauer formation
CON
Strain	Mean brood size	Maximum brood size	Minimum brood size	Standard Error of Mean	Number of biological replicates	Total sample size
N2	289.4	399	102	4.206	15	135
AA82 daf-12(rh284)	55.47	111	16	18.09	3	23
AA85 daf-12(rh285)	32.01	100	0	5.541	3	23
RG1228 daf-9(rh50)	44.17	149	0	7.014	3	30
AA292 daf-36(k114)	133.2	277	0	15.33	4	33
GR2063 hsd-1(mg433)	265.9	398	99	11.62	3	30
AE501 nhr-8(ok186)	335.2	437	260	7.567	3	30
AA1052 dhs-16(tm1890)	248.6	332	48	8.288	5	49
PDstv
Strain	Mean brood size	Maximum brood size	Minimum brood size	Standard Error of Mean	Number of biological replicates	Total sample size
N2	245.6	402	0	6.194	5	138
AA82 daf-12(rh284)	191.9	310	0	5.541	3	23
AA85 daf-12(rh285)	66.79	130	0	6.801	3	23
RG1228 daf-9(rh50)	185.5	331	0	15.58	3	30
AA292 daf-36(k114)	190.5	315	0	14.57	4	33
GR2063 hsd-1(mg433)	213.9	295	82	9.545	3	30
AE501 nhr-8(ok186)	269.9	376	140	13.34	3	28
AA1052 dhs-16(tm1890)	219.6	321	1	12.62	5	49
Brood size
N2 CON	N2 PDstv	AA82 daf-12(rh284) CON	AA82 daf-12(rh284) PDstv	AA85 daf-12(rh285) CON	AA85 daf-12(rh285) PDstv	RG1228 daf-9(rh50) CON	RG1228 daf-9(rh50) PDstv	AA292 daf-36(k114) CON	AA292 daf-36(k114) PDstv	GR2063 hsd-1(mg433) CON	GR2063 hsd-1(mg433) PDstv	AE501 nhr-8(ok186) CON	AE501 nhr-8(ok186) PDstv	AA1052 dhs-16(tm1890) CON	AA1052 dhs-16(tm1890) PDstv
248	206	58.3333	140	63	39.3333	113	210	192.333	177.333	237	175	369	270	232	199
308.667	136.5	68	138	20.3333	59.6667	86	220	148	260	293	284	391	354	233	248
249	311	51.5	192.5	34	104.25	7	247	83.5	241.5	300	211	320	322	267	192
328	261	76	310	23	63	17	243	7	240	145	135	393	196	239	282
286	240	46	237	3	0	54	216	126	183	370	237	295	240	276	287
290	237	109	252	23	84	31	0	233	211	273	225	330	140	310	114
378	262	34	259	53	56	58	0	46	311	241	129	357	187	181	235
264	265	47	209	30	26	25	186	118	242	245	187	289	193	272	1
274	362	45	186	7	80	78	44	0	249	306	211	362	305	270	282
371	281	61	253	53	54	91	331	187	217	99	210	310	372	123	61
311	304	59	236	49	54	39	176	260	232	226	233	312	263	332	2
309	232	64	135	5	42	75	148	142	315	297	226	297	184	260	218
260	243	73	251	16	92	20	218	0	216	309	293	372	200	265	2
329	206	39	4	40	30	85	215	203	91	245	253	298	376	252	1
219	298	43	0	0	116	43	86	236	187	193	172	355	177	234	245
332	106	111	233	15	72	84	157	1	99	265	216	364	275	267	3
320	177	48	231	7	54	46	213	230	278	237	232	260	285	241	264
295	187	60	257	7	88	0	168	40	0	323	95	319	317	277	316
313	136	44	248	43	45	0	271	195	279	214	241	437	312	100	288
313	261	40	248	21	100	17	0	125	250	276	251	380	355	48	264
313	138	16	212	36	36	0	188	0	24	265	82	283	316	229	299
265	129	65	183	100	130	37	248	250	226	304	275	373	155	292	217
292	229	18	0	88	111	14	259	249	3	318	231	314	237	275	263
253	372					32	292	214	57	317	295	322	291	321	186
279	263					0	251	277	135	398	193	330	362	259	208
315	392					58	157	71	199	291	225	381	294	239	236
307	379					0	141	117	130	140	233	274	231	272	265
267	310					66	257	83	144	277	192	305	347	262	260
333	246					0	198	88	213	291	258	348		296	210
301	295					149	225	125	275	281	216	315		243	274
279	213							51	179					290	248
267	239							222	237					263	233
238	320							76	185					244	270
263	225													237	192
236	145													245	249
306	304													308	249
303	251													123	247
297	242													268	201
268	241													248	248
239	317													280	317
269	231													276	264
242	286													258	268
287	236													308	307
296	220													279	290
235	264													110	220
310	183													262	321
183	199													268	278
272	155													233	178
243	271													313	258
275	217
234	193
303	275
263	252
288	312
167	218
272	301
344	302
215	178
230	247
310	243
305	248
343	205
325	119
296	168
272	146
352	155
263	259
291	196
281	154
384	164
346	402
280	159
254	265
303	348
343	274
376	72
343	260
322	116
329	141
258	105
332	195
271	314
266	300
251	294
249	266
276	336
305	271
238	308
273	311
272	207
257	273
200	358
292	328
343	302
262	301
250	262
318	335
202	4
303	269
268	276
319	204
310	273
327	352
265	292
189	328
261	301
350	257
102	247
306	272
331	266
357	0
319	73
296	254
311	287
248	99
206	250
279	301
306	242
215	207
331	351
399	267
333	267
240	248
347	290
367	288
347	260
340	318
327	256
359	159
387	300
229	273
325	294
392	273
281	272
211	288
	271
	226
	281

## Sheet: Statistical analysis
Statistical analysis
Šídák's multiple comparisons test	Mean Diff.	95.00% CI of diff.	Below threshold?	Summary	Adjusted P Value
N2 CON vs. N2 PDStv	43.72	22.25 to 65.19	Yes	****	<0.0001
daf-12(rh284) CON vs. daf-12(rh284) PDStv	-136.5	-188.8 to -84.17	Yes	****	<0.0001
daf-12(rh285) CON vs. daf-12(rh285) PDStv	-34.78	-87.08 to 17.52	No	ns	0.4372
daf-9(rh50) CON vs. daf­9(rh50) PDStv	-141.3	-187.1 to -95.54	Yes	****	<0.0001
daf-36(k114) CON vs. daf-36(k114) PDStv	-57.27	-100.9 to -13.61	Yes	**	0.0028
hsd-1(mg433) CON vs. hsd-1(mg433) PDStv	52	6.208 to 97.79	Yes	*	0.0157
nhr-8(ok186) CON vs. nhr-8(ok186) PDStv	65.31	18.71 to 111.9	Yes	**	0.0011
dhs-16(tm1890) CON vs. dhs-16(tm1890) PDStv	28.98	-6.851 to 64.81	No	ns	0.1984
N2 CON vs. daf-12(rh284) CON	233.9	194.5 to 273.2	Yes	****	<0.0001
N2 CON vs. daf-12(rh285) CON	257.3	218.0 to 296.7	Yes	****	<0.0001
N2 CON vs. daf-9(rh50) CON	245.2	210.0 to 280.4	Yes	****	<0.0001
N2 CON vs. daf-36(k114) CON	156.1	122.3 to 190.0	Yes	****	<0.0001
N2 CON vs. hsd-1(mg433) CON	23.49	-11.73 to 58.70	No	ns	0.4124
N2 CON vs. nhr-8(ok186) CON	-45.81	-81.03 to -10.60	Yes	**	0.0035
N2 CON vs. dhs-16(tm1890) CON	40.78	11.68 to 69.88	Yes	**	0.0012
N2 PDStv vs. daf-12(rh284) PDStv	53.7	14.41 to 92.99	Yes	**	0.0018
N2 PDStv vs. daf-12(rh285) PDStv	178.8	139.5 to 218.1	Yes	****	<0.0001
N2 PDStv vs. daf­9(rh50) PDStv	60.13	24.99 to 95.28	Yes	****	<0.0001
N2 PDStv vs. daf-36(k114) PDStv	55.15	21.35 to 88.96	Yes	****	<0.0001
N2 PDStv vs. hsd-1(mg433) PDStv	31.77	-3.377 to 66.91	No	ns	0.1021
N2 PDStv vs. nhr-8(ok186) PDStv	-24.22	-60.38 to 11.94	No	ns	0.4069
N2 PDStv vs. dhs-16(tm1890) PDStv	26.04	-2.970 to 55.05	No	ns	0.1066
