# Supplementary material for: エンドトキシン吸着療法(PMX) (特集 間質性肺炎治療法の新展開)
Source: eLife journal article supplement (doi:10.7554/elife.61459), 2010-04-01
Supplement: supp [file elife-61459-supp-v1.zip › elife_poa_e61459_Figure_2_figure_supplement_1_source_data_1.xlsx]

## Sheet: Sheet
Figure 2-figure supplement 1-Source Data 1: Comparison of DAF-16 and PQM-1 targets (Tepper et al. 2013) with differentially expressed genes in N2 PDStv to N2 CON (Ow et al. 2018).
DAF-16 Class I target genes (Tepper et al. 2013)	PDstv (DE down) genes present in Class I gene list	PDstv (DE up) genes present in Class I gene list	PQM-1 Class II target genes (Tepper et al. 2013)	PDstv (DE down) genes present in Class II gene list	PDstv (DE up) genes present in Class II gene list
WBGene00003473	WBGene00004798	WBGene00016655	WBGene00009898	WBGene00009897	WBGene00009898
WBGene00018602	WBGene00019381	WBGene00022245	WBGene00010125	WBGene00003777	WBGene00007875
WBGene00019978	WBGene00001686	WBGene00016716	WBGene00007875	WBGene00003792	WBGene00022645
WBGene00001500	WBGene00001683	WBGene00009221	WBGene00022610	WBGene00002077	WBGene00009237
WBGene00003096	WBGene00022037	WBGene00007228	WBGene00009429	WBGene00010113	WBGene00017592
WBGene00011869	WBGene00020696	WBGene00011474	WBGene00022645	WBGene00000257	WBGene00010266
WBGene00016052	WBGene00021035	WBGene00010769	WBGene00009237	WBGene00009368	WBGene00021224
WBGene00018195	WBGene00009662	WBGene00000207	WBGene00018643	WBGene00015499	WBGene00003828
WBGene00019780	WBGene00016178	WBGene00017881	WBGene00003877	WBGene00007048	WBGene00000785
WBGene00001685		WBGene00000216	WBGene00010745	WBGene00012360	WBGene00004020
WBGene00077701		WBGene00000217	WBGene00017592	WBGene00009460	WBGene00010128
WBGene00001684		WBGene00016957	WBGene00010266	WBGene00018362	WBGene00009433
WBGene00011362		WBGene00015116	WBGene00021224	WBGene00007225	WBGene00018910
WBGene00016716		WBGene00018755	WBGene00020182	WBGene00001599	WBGene00019738
WBGene00012404		WBGene00000273	WBGene00010070	WBGene00019510	WBGene00000136
WBGene00001397		WBGene00018195	WBGene00003828	WBGene00010056	WBGene00012201
WBGene00000929		WBGene00015355	WBGene00000785	WBGene00022586	WBGene00003813
WBGene00008296		WBGene00007336	WBGene00003571	WBGene00001563	WBGene00009397
WBGene00013972		WBGene00007365	WBGene00007508	WBGene00001259	WBGene00010660
WBGene00017336		WBGene00015605	WBGene00011979	WBGene00004042	WBGene00012592
WBGene00007440		WBGene00007440	WBGene00007867	WBGene00003508	WBGene00009048
WBGene00019472		WBGene00007474	WBGene00019565	WBGene00018862	WBGene00007812
WBGene00009803		WBGene00007598	WBGene00007872	WBGene00017800	WBGene00019411
WBGene00017303		WBGene00015887	WBGene00010749	WBGene00008053	WBGene00002259
WBGene00019719		WBGene00015947	WBGene00003730	WBGene00004955	WBGene00007685
WBGene00016848		WBGene00007689	WBGene00006915	WBGene00004392	WBGene00008199
WBGene00018174		WBGene00016097	WBGene00007873	WBGene00003785	WBGene00001993
WBGene00015116		WBGene00007758	WBGene00004020	WBGene00017738	WBGene00006609
WBGene00013079		WBGene00007765	WBGene00011486	WBGene00008921	WBGene00013947
WBGene00043187		WBGene00016316	WBGene00017594	WBGene00001829	WBGene00007153
WBGene00022713		WBGene00016407	WBGene00007833	WBGene00008218	WBGene00022201
WBGene00008446		WBGene00008032	WBGene00008132	WBGene00001511	WBGene00001786
WBGene00004997		WBGene00008211	WBGene00008584	WBGene00008733	WBGene00007097
WBGene00019803		WBGene00016785	WBGene00010128	WBGene00000098	WBGene00020579
WBGene00020397		WBGene00008228	WBGene00009433	WBGene00001827	WBGene00011291
WBGene00015044		WBGene00016875	WBGene00009488	WBGene00003789	WBGene00000776
WBGene00010790		WBGene00016894	WBGene00010123	WBGene00004326	WBGene00012968
WBGene00008341		WBGene00045400	WBGene00016103	WBGene00013038	WBGene00016669
WBGene00020909		WBGene00000277	WBGene00018910	WBGene00004337	WBGene00002137
WBGene00004798		WBGene00000282	WBGene00008565	WBGene00001860	WBGene00016425
WBGene00004932		WBGene00006861	WBGene00019738	WBGene00004110	WBGene00019682
WBGene00018448		WBGene00015660	WBGene00011262	WBGene00010353	WBGene00007811
WBGene00016097		WBGene00000370	WBGene00012018	WBGene00017546	WBGene00015932
WBGene00001564		WBGene00008296	WBGene00000136	WBGene00009701	WBGene00007536
WBGene00007363		WBGene00010470	WBGene00007509	WBGene00006977	WBGene00019760
WBGene00007452		WBGene00010471	WBGene00016585	WBGene00011036	WBGene00022644
WBGene00013888		WBGene00009393	WBGene00002090	WBGene00003413	WBGene00002054
WBGene00001852		WBGene00021895	WBGene00012201	WBGene00000871	WBGene00008726
WBGene00001841		WBGene00021872	WBGene00003813	WBGene00005023	WBGene00020760
WBGene00008040		WBGene00000677	WBGene00011676	WBGene00012341	WBGene00012464
WBGene00013887		WBGene00000698	WBGene00000007	WBGene00003157	WBGene00015050
WBGene00004068		WBGene00000699	WBGene00014138	WBGene00016534	WBGene00009902
WBGene00017621		WBGene00000728	WBGene00011800	WBGene00004243	WBGene00002257
WBGene00011733		WBGene00000733	WBGene00019017	WBGene00004166	WBGene00017964
WBGene00011232		WBGene00000641	WBGene00009397	WBGene00001832	WBGene00018562
WBGene00019376		WBGene00000671	WBGene00010660	WBGene00009285	WBGene00017417
WBGene00006603		WBGene00000673	WBGene00007808	WBGene00003800	WBGene00015403
WBGene00018200		WBGene00021487	WBGene00003999	WBGene00017816	WBGene00002058
WBGene00003778		WBGene00021491	WBGene00003572	WBGene00003230	WBGene00000557
WBGene00017970		WBGene00000535	WBGene00017969	WBGene00009203	WBGene00010274
WBGene00016894		WBGene00000534	WBGene00000539	WBGene00008789	WBGene00007565
WBGene00001391		WBGene00000779	WBGene00012592	WBGene00000386	WBGene00008621
WBGene00011894		WBGene00000789	WBGene00009048	WBGene00021470	WBGene00017691
WBGene00018460		WBGene00000822	WBGene00003957	WBGene00011376	WBGene00009984
WBGene00023425		WBGene00000830	WBGene00019660	WBGene00004217	WBGene00004789
WBGene00044045		WBGene00000831	WBGene00011803	WBGene00002080	WBGene00009453
WBGene00001752		WBGene00008810	WBGene00008042	WBGene00010621	WBGene00020938
WBGene00019730		WBGene00011672	WBGene00015965	WBGene00018950	WBGene00018971
WBGene00013078		WBGene00008519	WBGene00020382	WBGene00002169	WBGene00018731
WBGene00002263		WBGene00007963	WBGene00012819	WBGene00010061	WBGene00021060
WBGene00000535		WBGene00007964	WBGene00017703	WBGene00006739	WBGene00004196
WBGene00020593		WBGene00014697	WBGene00007812	WBGene00008385	WBGene00003539
WBGene00012122		WBGene00011830	WBGene00019411	WBGene00007042	WBGene00000788
WBGene00015947		WBGene00017108	WBGene00021979	WBGene00008387	WBGene00009434
WBGene00044284		WBGene00019962	WBGene00008068	WBGene00004775	WBGene00002273
WBGene00000989		WBGene00007848	WBGene00010238	WBGene00003154	WBGene00020516
WBGene00013481		WBGene00008390	WBGene00016314	WBGene00019940	WBGene00011006
WBGene00022597		WBGene00000929	WBGene00002259	WBGene00000939	WBGene00017241
WBGene00021183		WBGene00017773	WBGene00007685	WBGene00001596	WBGene00018760
WBGene00021079		WBGene00000981	WBGene00022593	WBGene00000101	WBGene00013037
WBGene00019464		WBGene00000966	WBGene00008199	WBGene00003158	WBGene00000081
WBGene00018532		WBGene00000983	WBGene00022130	WBGene00019608	WBGene00000522
WBGene00000551		WBGene00000993	WBGene00013901	WBGene00002225	WBGene00001501
WBGene00011870		WBGene00000973	WBGene00017962		WBGene00016756
WBGene00019232		WBGene00016052	WBGene00016632		WBGene00011222
WBGene00010377		WBGene00017128	WBGene00007810		WBGene00015933
WBGene00017659		WBGene00001156	WBGene00001993		WBGene00045417
WBGene00018400		WBGene00001169	WBGene00008123		WBGene00002056
WBGene00014213		WBGene00001240	WBGene00007753		WBGene00009706
WBGene00003524		WBGene00001244	WBGene00004023		WBGene00007807
WBGene00016172		WBGene00008572	WBGene00006609		WBGene00015791
WBGene00012294		WBGene00017303	WBGene00007866		WBGene00001770
WBGene00001763		WBGene00008654	WBGene00019164		WBGene00012834
WBGene00021491		WBGene00008739	WBGene00008258		WBGene00045461
WBGene00003652		WBGene00008777	WBGene00017093		WBGene00020446
WBGene00017773		WBGene00017484	WBGene00013947		WBGene00020340
WBGene00014030		WBGene00017485	WBGene00019533		WBGene00016061
WBGene00009617		WBGene00008865	WBGene00007153		WBGene00014244
WBGene00013975		WBGene00017539	WBGene00015259		WBGene00020847
WBGene00016845		WBGene00008979	WBGene00022201		WBGene00000190
WBGene00011831		WBGene00017659	WBGene00001786		WBGene00022181
WBGene00001578		WBGene00017660	WBGene00007054		WBGene00009226
WBGene00000830		WBGene00009049	WBGene00003959		WBGene00006798
WBGene00008335		WBGene00017717	WBGene00000412		WBGene00015713
WBGene00017128		WBGene00009091	WBGene00015695		WBGene00007283
WBGene00013882		WBGene00017756	WBGene00009830		WBGene00007506
WBGene00008388		WBGene00017789	WBGene00008741		WBGene00021977
WBGene00003528		WBGene00017838	WBGene00000391		WBGene00001761
WBGene00009486		WBGene00017971	WBGene00007097		WBGene00008358
WBGene00011718		WBGene00018145	WBGene00016474		WBGene00008357
WBGene00020329		WBGene00018146	WBGene00012529		WBGene00015389
WBGene00020135		WBGene00009512	WBGene00020579		WBGene00015455
WBGene00015163		WBGene00018174	WBGene00020256		WBGene00008393
WBGene00013633		WBGene00018217	WBGene00007857		WBGene00019100
WBGene00017673		WBGene00009635	WBGene00000022		WBGene00015216
WBGene00008415		WBGene00018384	WBGene00014135		WBGene00008359
WBGene00012085		WBGene00018400	WBGene00011291		WBGene00010007
WBGene00017429		WBGene00018459	WBGene00002139		WBGene00018823
WBGene00019489		WBGene00009723	WBGene00018779		WBGene00019097
WBGene00021043		WBGene00009724	WBGene00017398		WBGene00000281
WBGene00010001		WBGene00009787	WBGene00000776		WBGene00018811
WBGene00021587		WBGene00018519	WBGene00002057		WBGene00015141
WBGene00002013		WBGene00018522	WBGene00017892		WBGene00012757
WBGene00000983		WBGene00018532	WBGene00008205		WBGene00021518
WBGene00010135		WBGene00018601	WBGene00008793		WBGene00019914
WBGene00020710		WBGene00018602	WBGene00012968		WBGene00009621
WBGene00001787		WBGene00009877	WBGene00010083		WBGene00010050
WBGene00007660		WBGene00018702	WBGene00016669		WBGene00001396
WBGene00015067		WBGene00009947	WBGene00021590		WBGene00000179
WBGene00016407		WBGene00009957	WBGene00022673		WBGene00017262
WBGene00010115		WBGene00018758	WBGene00002137		WBGene00009982
WBGene00007357		WBGene00010001	WBGene00009897		WBGene00009971
WBGene00004811		WBGene00010049	WBGene00016425		WBGene00008494
WBGene00019495		WBGene00010065	WBGene00009259		WBGene00012251
WBGene00009805		WBGene00010085	WBGene00004052		WBGene00008564
WBGene00016506		WBGene00010086	WBGene00016064		WBGene00017103
WBGene00017698		WBGene00010135	WBGene00003738		WBGene00016763
WBGene00001957		WBGene00019022	WBGene00020359		WBGene00021852
WBGene00006602		WBGene00019060	WBGene00015828		WBGene00006530
WBGene00000083		WBGene00044792	WBGene00010644		WBGene00013393
WBGene00015076		WBGene00001387	WBGene00020128		WBGene00013541
WBGene00001387		WBGene00022200	WBGene00019682		WBGene00012462
WBGene00017488		WBGene00001397	WBGene00016004		WBGene00019564
WBGene00016274		WBGene00001398	WBGene00017648		WBGene00002021
WBGene00000013		WBGene00007453	WBGene00020813		WBGene00008922
WBGene00018701		WBGene00010183	WBGene00014666		WBGene00019479
WBGene00020895		WBGene00007989	WBGene00007419		WBGene00013284
WBGene00022781		WBGene00044686	WBGene00018237		WBGene00016893
WBGene00008390		WBGene00020082	WBGene00007507		WBGene00000214
WBGene00017443		WBGene00001578	WBGene00008560		WBGene00000215
WBGene00011263		WBGene00014030	WBGene00044642		WBGene00008602
WBGene00000212		WBGene00001604	WBGene00007811		WBGene00013136
WBGene00015605		WBGene00001684	WBGene00007362		WBGene00044081
WBGene00009963		WBGene00001685	WBGene00020280		WBGene00000556
WBGene00009820		WBGene00001699	WBGene00015932		WBGene00007913
WBGene00008044		WBGene00001702	WBGene00007536		WBGene00011407
WBGene00012810		WBGene00001692	WBGene00019760		WBGene00002255
WBGene00008850		WBGene00001694	WBGene00022644		WBGene00009493
WBGene00008304		WBGene00001758	WBGene00016174		WBGene00015684
WBGene00001751		WBGene00001777	WBGene00000005		WBGene00016769
WBGene00006685		WBGene00001787	WBGene00020992		WBGene00001476
WBGene00011495		WBGene00001790	WBGene00018540		WBGene00022856
WBGene00015599		WBGene00001753	WBGene00010887		WBGene00013392
WBGene00017166		WBGene00016204	WBGene00012058		WBGene00017574
WBGene00011420		WBGene00006863	WBGene00013557		WBGene00022382
WBGene00004930		WBGene00010424	WBGene00013946		WBGene00077593
WBGene00012121		WBGene00019978	WBGene00002054		WBGene00012747
WBGene00014140		WBGene00009663	WBGene00018647		WBGene00002138
WBGene00016204		WBGene00020509	WBGene00010158		WBGene00009710
WBGene00016628		WBGene00001843	WBGene00009008		WBGene00008354
WBGene00015043		WBGene00001945	WBGene00008726		WBGene00019895
WBGene00044201		WBGene00002012	WBGene00044356		WBGene00001784
WBGene00008332		WBGene00002017	WBGene00021222		WBGene00016788
WBGene00013636		WBGene00002016	WBGene00018917		WBGene00000067
WBGene00010065		WBGene00002023	WBGene00011938		WBGene00018342
WBGene00011325		WBGene00001564	WBGene00020760		WBGene00012358
WBGene00008038		WBGene00010488	WBGene00022813		WBGene00017012
WBGene00020739		WBGene00019298	WBGene00012464		WBGene00000116
WBGene00020784		WBGene00010507	WBGene00016294		WBGene00015803
WBGene00001692		WBGene00019368	WBGene00004093		WBGene00016379
WBGene00011424		WBGene00010597	WBGene00015050		WBGene00008936
WBGene00018755		WBGene00019489	WBGene00010595		WBGene00017658
WBGene00002267		WBGene00010727	WBGene00017948		WBGene00021190
WBGene00006610		WBGene00019656	WBGene00009902		WBGene00004358
WBGene00008396		WBGene00002188	WBGene00017500		WBGene00003773
WBGene00010528		WBGene00016848	WBGene00021978		WBGene00015802
WBGene00017089		WBGene00002253	WBGene00009487		WBGene00000784
WBGene00021379		WBGene00002258	WBGene00007103		WBGene00018874
WBGene00007384		WBGene00002265	WBGene00002257		WBGene00009192
WBGene00016875		WBGene00002267	WBGene00017964		WBGene00000178
WBGene00010695		WBGene00002268	WBGene00018562		WBGene00021869
WBGene00016511		WBGene00002269	WBGene00010277		WBGene00020788
WBGene00019381		WBGene00002891	WBGene00003977		WBGene00010456
WBGene00044697		WBGene00022500	WBGene00010872		WBGene00011190
WBGene00010424		WBGene00009773	WBGene00011330		WBGene00003958
WBGene00022546		WBGene00003091	WBGene00021709		WBGene00045457
WBGene00018459		WBGene00003096	WBGene00017417		WBGene00017105
WBGene00018461		WBGene00003097	WBGene00015403		WBGene00016450
WBGene00006816		WBGene00010901	WBGene00012217		WBGene00005002
WBGene00001182		WBGene00019780	WBGene00012583		WBGene00012213
WBGene00013220		WBGene00010681	WBGene00000938		WBGene00017448
WBGene00016984		WBGene00021772	WBGene00015333		WBGene00021354
WBGene00001113		WBGene00003235	WBGene00018907		WBGene00015469
WBGene00012398		WBGene00003444	WBGene00008629		WBGene00003934
WBGene00006861		WBGene00003473	WBGene00017775		WBGene00015382
WBGene00016863		WBGene00003588	WBGene00002058		WBGene00003090
WBGene00001693		WBGene00003589	WBGene00008596		WBGene00008669
WBGene00002012		WBGene00010117	WBGene00021565		WBGene00009634
WBGene00012491		WBGene00003766	WBGene00007455		WBGene00003495
WBGene00010321		WBGene00008295	WBGene00007717		WBGene00009595
WBGene00003124		WBGene00003778	WBGene00000557		WBGene00007315
WBGene00011692		WBGene00003891	WBGene00000512		WBGene00008486
WBGene00001441		WBGene00021043	WBGene00010274		WBGene00009347
WBGene00016310		WBGene00011232	WBGene00007533		WBGene00013559
WBGene00020736		WBGene00019803	WBGene00018966		WBGene00002024
WBGene00020373		WBGene00003990	WBGene00012961		WBGene00012253
WBGene00010018		WBGene00004062	WBGene00000799		WBGene00044107
WBGene00012886		WBGene00022781	WBGene00007565		WBGene00003982
WBGene00010368		WBGene00004131	WBGene00020269		WBGene00010960
WBGene00016849		WBGene00011105	WBGene00001164		WBGene00006438
WBGene00016535		WBGene00004311	WBGene00021603		WBGene00008499
WBGene00007680		WBGene00011392	WBGene00044094		WBGene00013394
WBGene00020674		WBGene00009895	WBGene00006608		WBGene00020456
WBGene00021081		WBGene00019495	WBGene00020144		WBGene00016874
WBGene00022474		WBGene00004809	WBGene00011235		WBGene00001395
WBGene00011105		WBGene00004810	WBGene00016496		WBGene00009691
WBGene00017374		WBGene00004811	WBGene00008621		WBGene00007112
WBGene00012444		WBGene00010790	WBGene00017691		WBGene00016335
WBGene00005644		WBGene00015716	WBGene00018343		WBGene00016998
WBGene00020929		WBGene00004986	WBGene00000172
WBGene00012585		WBGene00004997	WBGene00010746
WBGene00000782		WBGene00004987	WBGene00010833
WBGene00019477		WBGene00005005	WBGene00015768
WBGene00013971		WBGene00004990	WBGene00010859
WBGene00019203		WBGene00004993	WBGene00003474
WBGene00018491		WBGene00012759	WBGene00017874
WBGene00000966		WBGene00023417	WBGene00014224
WBGene00021817		WBGene00020143	WBGene00007375
WBGene00015052		WBGene00020158	WBGene00009984
WBGene00008538		WBGene00011399	WBGene00006929
WBGene00000103		WBGene00011445	WBGene00000541
WBGene00016283		WBGene00011733	WBGene00004789
WBGene00018057		WBGene00011831	WBGene00022585
WBGene00008032		WBGene00011844	WBGene00010750
WBGene00018744		WBGene00020736	WBGene00001522
WBGene00011416		WBGene00011984	WBGene00016494
WBGene00008607		WBGene00012122	WBGene00018645
WBGene00000973		WBGene00012140	WBGene00018708
WBGene00017789		WBGene00012144	WBGene00020258
WBGene00011052		WBGene00009628	WBGene00016883
WBGene00022386		WBGene00006539	WBGene00001638
WBGene00016013		WBGene00009215	WBGene00009453
WBGene00003588		WBGene00006649	WBGene00019344
WBGene00007303		WBGene00007142	WBGene00021594
WBGene00012668		WBGene00013078	WBGene00007864
WBGene00005005		WBGene00013079	WBGene00012295
WBGene00008865		WBGene00017688	WBGene00044797
WBGene00009420		WBGene00044605	WBGene00010648
WBGene00016046		WBGene00017374	WBGene00000239
WBGene00015598		WBGene00008341	WBGene00018543
WBGene00000912		WBGene00011571	WBGene00020022
WBGene00008436		WBGene00019203	WBGene00020938
WBGene00044271		WBGene00022515	WBGene00018971
WBGene00044273		WBGene00010440	WBGene00022765
WBGene00044272		WBGene00020339	WBGene00019432
WBGene00044274		WBGene00010661	WBGene00044299
WBGene00044275		WBGene00012158	WBGene00002994
WBGene00016987		WBGene00007650	WBGene00018194
WBGene00002258		WBGene00006890	WBGene00013101
WBGene00017971		WBGene00020917	WBGene00018731
WBGene00020218		WBGene00020981	WBGene00006917
WBGene00021818		WBGene00021048	WBGene00021060
WBGene00001604		WBGene00021079	WBGene00018646
WBGene00004234		WBGene00013633	WBGene00013007
WBGene00011042		WBGene00021253	WBGene00004196
WBGene00016316		WBGene00021263	WBGene00020911
WBGene00015778		WBGene00021336	WBGene00011852
WBGene00016302		WBGene00021339	WBGene00003763
WBGene00007990		WBGene00012554	WBGene00009824
WBGene00021658		WBGene00012548	WBGene00023490
WBGene00017748		WBGene00021379	WBGene00017667
WBGene00012279		WBGene00012668	WBGene00001581
WBGene00018395		WBGene00021543	WBGene00006636
WBGene00007131		WBGene00012783	WBGene00000155
WBGene00022495		WBGene00012813	WBGene00008119
WBGene00011196		WBGene00012910	WBGene00003539
WBGene00019233		WBGene00021161	WBGene00000788
WBGene00021337		WBGene00021768	WBGene00009981
WBGene00009213		WBGene00013104	WBGene00009434
WBGene00000831		WBGene00021835	WBGene00002273
WBGene00000627		WBGene00013216	WBGene00001025
WBGene00001777		WBGene00021909	WBGene00001214
WBGene00021965		WBGene00013366	WBGene00003059
WBGene00012727		WBGene00013481	WBGene00000708
WBGene00017881		WBGene00022178	WBGene00020516
WBGene00017806		WBGene00022194	WBGene00019213
WBGene00016655		WBGene00022252	WBGene00009700
WBGene00021336		WBGene00022307	WBGene00011006
WBGene00000002		WBGene00013587	WBGene00003777
WBGene00016531		WBGene00022562	WBGene00007626
WBGene00017864		WBGene00022572	WBGene00017246
WBGene00001491		WBGene00022582	WBGene00020660
WBGene00003163		WBGene00022597	WBGene00044898
WBGene00012216		WBGene00013882	WBGene00007000
WBGene00023407		WBGene00013884	WBGene00022532
WBGene00009964		WBGene00022474	WBGene00016457
WBGene00011935		WBGene00022847	WBGene00017241
WBGene00000756		WBGene00022848	WBGene00020247
WBGene00020566		WBGene00014252	WBGene00000266
WBGene00002269		WBGene00013986	WBGene00018760
WBGene00007304		WBGene00014000	WBGene00013037
WBGene00000779		WBGene00014088	WBGene00001795
WBGene00002118		WBGene00014150	WBGene00000081
WBGene00011927			WBGene00000522
WBGene00007958			WBGene00009189
WBGene00010723			WBGene00016136
WBGene00020917			WBGene00022671
WBGene00001755			WBGene00011771
WBGene00011584			WBGene00018393
WBGene00008832			WBGene00001501
WBGene00013516			WBGene00017762
WBGene00011462			WBGene00019779
WBGene00008110			WBGene00008483
WBGene00010522			WBGene00016756
WBGene00018217			WBGene00019617
WBGene00015694			WBGene00006913
WBGene00007036			WBGene00015157
WBGene00011874			WBGene00011167
WBGene00013091			WBGene00019713
WBGene00002200			WBGene00016084
WBGene00009802			WBGene00011222
WBGene00000273			WBGene00010646
WBGene00009773			WBGene00022858
WBGene00022199			WBGene00013874
WBGene00007364			WBGene00004273
WBGene00020509			WBGene00007341
WBGene00016809			WBGene00003792
WBGene00016789			WBGene00008399
WBGene00009677			WBGene00000283
WBGene00017484			WBGene00010127
WBGene00010810			WBGene00015933
WBGene00020941			WBGene00011798
WBGene00007404			WBGene00009211
WBGene00050904			WBGene00008216
WBGene00019597			WBGene00003980
WBGene00018056			WBGene00045417
WBGene00009049			WBGene00001231
WBGene00001439			WBGene00002056
WBGene00015865			WBGene00006404
WBGene00022814			WBGene00077698
WBGene00015597			WBGene00009706
WBGene00022848			WBGene00016721
WBGene00010183			WBGene00012130
WBGene00009858			WBGene00021026
WBGene00012140			WBGene00016912
WBGene00019113			WBGene00019563
WBGene00018758			WBGene00008063
WBGene00001156			WBGene00006926
WBGene00010216			WBGene00010124
WBGene00000102			WBGene00007807
WBGene00012399			WBGene00015791
WBGene00019550			WBGene00020403
WBGene00018051			WBGene00017764
WBGene00015402			WBGene00019146
WBGene00010236			WBGene00006876
WBGene00017660			WBGene00000176
WBGene00011427			WBGene00001770
WBGene00011841			WBGene00022012
WBGene00016513			WBGene00012834
WBGene00015596			WBGene00045461
WBGene00012118			WBGene00017467
WBGene00021156			WBGene00020446
WBGene00019975			WBGene00022122
WBGene00015561			WBGene00020340
WBGene00001444			WBGene00017101
WBGene00020703			WBGene00017490
WBGene00012164			WBGene00011333
WBGene00044988			WBGene00011441
WBGene00000108			WBGene00017596
WBGene00021772			WBGene00022688
WBGene00020735			WBGene00021448
WBGene00020865			WBGene00016245
WBGene00008246			WBGene00017082
WBGene00000712			WBGene00012618
WBGene00017840			WBGene00000562
WBGene00010422			WBGene00016061
WBGene00013090			WBGene00014244
WBGene00021161			WBGene00004000
WBGene00016697			WBGene00017364
WBGene00012034			WBGene00007008
WBGene00013986			WBGene00015522
WBGene00007525			WBGene00001333
WBGene00001789			WBGene00020847
WBGene00000677			WBGene00001591
WBGene00015355			WBGene00006379
WBGene00010049			WBGene00018797
WBGene00017747			WBGene00018921
WBGene00011596			WBGene00003248
WBGene00017509			WBGene00017593
WBGene00008992			WBGene00000835
WBGene00018739			WBGene00019473
WBGene00015219			WBGene00000190
WBGene00004902			WBGene00022181
WBGene00007737			WBGene00016781
WBGene00007132			WBGene00006447
WBGene00007414			WBGene00020756
WBGene00007024			WBGene00019825
WBGene00009876			WBGene00011439
WBGene00020786			WBGene00008067
WBGene00016101			WBGene00020245
WBGene00018249			WBGene00003577
WBGene00007200			WBGene00009226
WBGene00021768			WBGene00013721
WBGene00019298			WBGene00002077
WBGene00021445			WBGene00009649
WBGene00010356			WBGene00006798
WBGene00011832			WBGene00009565
WBGene00007765			WBGene00015713
WBGene00008155			WBGene00010113
WBGene00017485			WBGene00007283
WBGene00003151			WBGene00007506
WBGene00022562			WBGene00021977
WBGene00023417			WBGene00050940
WBGene00001455			WBGene00012445
WBGene00007365			WBGene00011185
WBGene00007214			WBGene00001761
WBGene00007614			WBGene00015693
WBGene00015549			WBGene00014057
WBGene00010109			WBGene00015813
WBGene00009724			WBGene00000099
WBGene00003589			WBGene00007549
WBGene00011400			WBGene00003607
WBGene00008515			WBGene00017069
WBGene00011428			WBGene00010498
WBGene00010401			WBGene00007642
WBGene00006890			WBGene00004058
WBGene00004131			WBGene00022270
WBGene00011063			WBGene00009671
WBGene00017688			WBGene00008358
WBGene00000017			WBGene00000475
WBGene00011274			WBGene00008830
WBGene00011046			WBGene00008357
WBGene00008588			WBGene00015389
WBGene00017743			WBGene00008392
WBGene00044472			WBGene00015168
WBGene00015393			WBGene00015455
WBGene00016349			WBGene00044243
WBGene00017124			WBGene00007254
WBGene00018257			WBGene00012930
WBGene00012812			WBGene00004815
WBGene00001244			WBGene00043980
WBGene00001389			WBGene00013996
WBGene00018519			WBGene00010747
WBGene00007302			WBGene00016705
WBGene00021403			WBGene00014073
WBGene00009215			WBGene00013703
WBGene00002023			WBGene00008338
WBGene00010470			WBGene00008393
WBGene00018207			WBGene00015577
WBGene00014016			WBGene00002241
WBGene00009421			WBGene00001430
WBGene00002116			WBGene00021814
WBGene00004062			WBGene00008417
WBGene00018521			WBGene00000257
WBGene00021396			WBGene00012988
WBGene00013169			WBGene00008360
WBGene00000523			WBGene00008091
WBGene00010399			WBGene00001228
WBGene00011397			WBGene00019100
WBGene00022245			WBGene00006617
WBGene00016666			WBGene00004759
WBGene00008389			WBGene00015216
WBGene00000117			WBGene00008359
WBGene00019885			WBGene00006822
WBGene00011010			WBGene00013716
WBGene00009091			WBGene00022794
WBGene00007689			WBGene00011801
WBGene00021442			WBGene00001040
WBGene00009383			WBGene00019589
WBGene00008680			WBGene00022881
WBGene00007453			WBGene00003904
WBGene00006965			WBGene00015746
WBGene00012005			WBGene00011880
WBGene00009804			WBGene00018892
WBGene00017537			WBGene00009642
WBGene00007296			WBGene00018340
WBGene00017756			WBGene00019323
WBGene00001702			WBGene00012339
WBGene00008707			WBGene00018594
WBGene00006504			WBGene00003645
WBGene00015716			WBGene00019547
WBGene00012514			WBGene00022720
WBGene00022500			WBGene00010007
WBGene00020301			WBGene00001630
WBGene00020567			WBGene00019544
WBGene00009892			WBGene00018823
WBGene00015040			WBGene00020360
WBGene00011244			WBGene00003803
WBGene00013477			WBGene00017322
WBGene00007474			WBGene00014031
WBGene00018262			WBGene00010622
WBGene00001756			WBGene00010659
WBGene00018522			WBGene00022261
WBGene00009419			WBGene00015486
WBGene00008506			WBGene00009102
WBGene00004810			WBGene00017677
WBGene00019006			WBGene00019215
WBGene00011884			WBGene00013435
WBGene00018380			WBGene00016644
WBGene00020604			WBGene00008917
WBGene00017539			WBGene00006062
WBGene00004809			WBGene00017595
WBGene00010901			WBGene00010189
WBGene00002163			WBGene00009098
WBGene00017329			WBGene00006925
WBGene00010597			WBGene00018261
WBGene00016923			WBGene00016431
WBGene00007472			WBGene00019097
WBGene00000073			WBGene00009368
WBGene00012564			WBGene00016947
WBGene00014150			WBGene00013697
WBGene00007650			WBGene00015499
WBGene00003097			WBGene00011035
WBGene00018280			WBGene00002694
WBGene00006416			WBGene00017442
WBGene00000686			WBGene00006936
WBGene00000789			WBGene00015908
WBGene00008654			WBGene00001602
WBGene00008333			WBGene00013725
WBGene00010681			WBGene00000281
WBGene00018218			WBGene00018811
WBGene00011251			WBGene00020761
WBGene00018601			WBGene00018435
WBGene00010661			WBGene00008127
WBGene00002093			WBGene00002035
WBGene00018466			WBGene00004094
WBGene00002891			WBGene00015141
WBGene00002268			WBGene00003136
WBGene00045297			WBGene00018210
WBGene00005189			WBGene00008318
WBGene00008905			WBGene00001403
WBGene00019961			WBGene00015085
WBGene00001572			WBGene00020932
WBGene00022847			WBGene00004135
WBGene00009340			WBGene00012757
WBGene00021263			WBGene00010472
WBGene00001240			WBGene00016422
WBGene00008739			WBGene00019629
WBGene00011159			WBGene00016629
WBGene00008975			WBGene00021518
WBGene00004130			WBGene00006512
WBGene00001674			WBGene00007048
WBGene00017126			WBGene00019914
WBGene00009532			WBGene00005949
WBGene00012434			WBGene00009621
WBGene00001793			WBGene00015217
WBGene00010593			WBGene00009520
WBGene00020343			WBGene00004814
WBGene00015436			WBGene00018970
WBGene00007969			WBGene00012360
WBGene00020869			WBGene00022456
WBGene00015077			WBGene00000722
WBGene00001686			WBGene00012890
WBGene00015600			WBGene00013694
WBGene00002265			WBGene00016890
WBGene00016957			WBGene00006518
WBGene00013896			WBGene00008787
WBGene00007930			WBGene00009507
WBGene00000673			WBGene00010050
WBGene00009723			WBGene00006736
WBGene00007071			WBGene00006394
WBGene00008492			WBGene00000226
WBGene00013884			WBGene00009460
WBGene00011461			WBGene00013207
WBGene00008760			WBGene00008991
WBGene00020307			WBGene00001396
WBGene00022252			WBGene00004888
WBGene00010769			WBGene00015037
WBGene00007758			WBGene00018375
WBGene00001699			WBGene00016415
WBGene00022050			WBGene00012211
WBGene00019657			WBGene00000179
WBGene00012544			WBGene00017262
WBGene00006779			WBGene00016786
WBGene00007336			WBGene00021420
WBGene00011252			WBGene00010256
WBGene00017804			WBGene00022015
WBGene00012069			WBGene00009854
WBGene00013548			WBGene00022865
WBGene00008809			WBGene00008485
WBGene00003965			WBGene00020989
WBGene00006774			WBGene00004033
WBGene00016131			WBGene00011975
WBGene00012057			WBGene00003835
WBGene00017168			WBGene00019005
WBGene00020651			WBGene00009007
WBGene00008678			WBGene00007564
WBGene00003053			WBGene00004400
WBGene00016924			WBGene00018890
WBGene00007989			WBGene00018362
WBGene00018702			WBGene00017855
WBGene00008297			WBGene00002999
WBGene00008421			WBGene00006919
WBGene00016095			WBGene00004779
WBGene00006462			WBGene00018422
WBGene00008076			WBGene00011016
WBGene00006762			WBGene00009342
WBGene00020806			WBGene00009982
WBGene00021492			WBGene00044169
WBGene00000107			WBGene00020504
WBGene00000715			WBGene00013958
WBGene00020613			WBGene00009971
WBGene00013889			WBGene00006047
WBGene00022254			WBGene00016676
WBGene00001000			WBGene00015805
WBGene00009935			WBGene00015609
WBGene00001623			WBGene00006059
WBGene00003891			WBGene00015859
WBGene00007964			WBGene00013709
WBGene00009618			WBGene00000055
WBGene00019090			WBGene00000040
WBGene00022614			WBGene00018303
WBGene00001768			WBGene00008494
WBGene00019060			WBGene00012251
WBGene00016403			WBGene00001816
WBGene00004740			WBGene00018893
WBGene00008311			WBGene00017751
WBGene00011429			WBGene00009629
WBGene00011417			WBGene00005138
WBGene00044686			WBGene00007721
WBGene00011305			WBGene00012683
WBGene00015435			WBGene00008718
WBGene00015919			WBGene00008564
WBGene00005602			WBGene00016760
WBGene00016846			WBGene00016063
WBGene00022515			WBGene00017201
WBGene00012987			WBGene00021745
WBGene00008539			WBGene00004721
WBGene00008777			WBGene00017990
WBGene00001631			WBGene00006910
WBGene00004921			WBGene00022482
WBGene00000110			WBGene00044796
WBGene00011763			WBGene00017103
WBGene00001694			WBGene00008891
WBGene00017445			WBGene00015697
WBGene00001463			WBGene00011494
WBGene00001749			WBGene00006590
WBGene00009789			WBGene00022114
WBGene00005533			WBGene00013311
WBGene00009623			WBGene00016763
WBGene00020251			WBGene00007225
WBGene00012107			WBGene00021852
WBGene00010086			WBGene00001599
WBGene00016315			WBGene00009672
WBGene00018912			WBGene00019510
WBGene00021997			WBGene00004684
WBGene00007848			WBGene00006530
WBGene00008572			WBGene00011893
WBGene00010062			WBGene00020821
WBGene00017463			WBGene00004823
WBGene00017331			WBGene00013677
WBGene00004818			WBGene00021585
WBGene00017428			WBGene00003402
WBGene00007395			WBGene00009883
WBGene00010707			WBGene00013393
WBGene00001843			WBGene00012989
WBGene00003603			WBGene00004762
WBGene00009628			WBGene00011713
WBGene00015889			WBGene00010056
WBGene00002133			WBGene00004508
WBGene00004226			WBGene00017247
WBGene00016896			WBGene00001973
WBGene00004998			WBGene00009499
WBGene00017468			WBGene00019379
WBGene00015896			WBGene00044793
WBGene00018145			WBGene00016577
WBGene00006923			WBGene00017092
WBGene00013637			WBGene00021112
WBGene00015593			WBGene00009660
WBGene00000277			WBGene00015501
WBGene00015042			WBGene00011543
WBGene00013216			WBGene00004752
WBGene00008519			WBGene00022458
WBGene00011474			WBGene00008099
WBGene00017563			WBGene00002043
WBGene00016059			WBGene00009798
WBGene00001683			WBGene00022459
WBGene00009339			WBGene00018413
WBGene00000111			WBGene00017159
WBGene00007591			WBGene00019546
WBGene00009600			WBGene00013541
WBGene00004182			WBGene00003653
WBGene00008980			WBGene00007391
WBGene00016500			WBGene00003996
WBGene00000975			WBGene00022586
WBGene00016028			WBGene00016840
WBGene00018911			WBGene00019087
WBGene00019311			WBGene00008429
WBGene00020079			WBGene00009451
WBGene00010197			WBGene00004103
WBGene00011154			WBGene00003815
WBGene00017640			WBGene00012462
WBGene00001450			WBGene00001563
WBGene00003167			WBGene00015237
WBGene00000698			WBGene00019564
WBGene00020738			WBGene00007515
WBGene00021876			WBGene00022025
WBGene00021446			WBGene00008317
WBGene00009635			WBGene00003409
WBGene00008810			WBGene00002021
WBGene00009663			WBGene00011147
WBGene00016195			WBGene00021186
WBGene00022037			WBGene00022831
WBGene00045400			WBGene00008990
WBGene00019944			WBGene00009177
WBGene00017054			WBGene00008922
WBGene00020158			WBGene00007463
WBGene00003786			WBGene00022869
WBGene00011276			WBGene00000911
WBGene00019294			WBGene00001259
WBGene00020577			WBGene00015829
WBGene00009388			WBGene00001910
WBGene00022788			WBGene00009483
WBGene00004924			WBGene00003648
WBGene00007957			WBGene00018782
WBGene00016657			WBGene00019479
WBGene00004993			WBGene00001543
WBGene00010407			WBGene00001978
WBGene00019521			WBGene00013284
WBGene00017507			WBGene00016793
WBGene00010473			WBGene00019763
WBGene00008591			WBGene00007278
WBGene00020741			WBGene00004269
WBGene00000993			WBGene00012105
WBGene00018055			WBGene00011864
WBGene00010730			WBGene00016740
WBGene00000250			WBGene00006886
WBGene00001790			WBGene00019644
WBGene00021701			WBGene00015400
WBGene00015041			WBGene00008676
WBGene00006060			WBGene00004042
WBGene00003664			WBGene00004813
WBGene00010408			WBGene00001241
WBGene00010079			WBGene00016893
WBGene00018576			WBGene00044789
WBGene00008477			WBGene00011668
WBGene00021540			WBGene00013575
WBGene00077691			WBGene00004186
WBGene00012783			WBGene00000214
WBGene00001453			WBGene00011032
WBGene00011264			WBGene00018424
WBGene00019963			WBGene00020693
WBGene00021011			WBGene00016544
WBGene00011419			WBGene00013080
WBGene00004742			WBGene00009515
WBGene00011849			WBGene00007748
WBGene00020497			WBGene00007972
WBGene00011445			WBGene00016601
WBGene00003774			WBGene00014230
WBGene00012162			WBGene00011353
WBGene00000749			WBGene00009987
WBGene00003633			WBGene00010541
WBGene00000978			WBGene00000731
WBGene00012610			WBGene00006928
WBGene00017315			WBGene00013603
WBGene00044989			WBGene00017086
WBGene00010471			WBGene00002879
WBGene00020276			WBGene00018100
WBGene00020045			WBGene00020419
WBGene00006411			WBGene00009504
WBGene00000699			WBGene00017289
WBGene00014017			WBGene00013197
WBGene00010705			WBGene00001819
WBGene00008254			WBGene00018508
WBGene00044179			WBGene00009264
WBGene00004819			WBGene00020376
WBGene00018286			WBGene00016589
WBGene00022307			WBGene00018605
WBGene00017483			WBGene00004001
WBGene00005900			WBGene00000215
WBGene00012258			WBGene00015311
WBGene00003703			WBGene00012593
WBGene00020200			WBGene00008222
WBGene00008352			WBGene00012950
WBGene00012175			WBGene00008602
WBGene00018076			WBGene00044637
WBGene00003998			WBGene00017310
WBGene00009754			WBGene00006963
WBGene00021089			WBGene00013136
WBGene00013587			WBGene00044081
WBGene00009787			WBGene00000556
WBGene00018274			WBGene00020903
WBGene00017719			WBGene00010122
WBGene00018657			WBGene00017832
WBGene00015452			WBGene00012923
WBGene00012673			WBGene00044302
WBGene00021452			WBGene00003508
WBGene00019108			WBGene00001017
WBGene00020617			WBGene00015112
WBGene00000133			WBGene00003845
WBGene00014088			WBGene00010126
WBGene00020962			WBGene00022412
WBGene00000531			WBGene00019532
WBGene00003458			WBGene00011000
WBGene00004222			WBGene00007913
WBGene00015427			WBGene00019824
WBGene00003534			WBGene00011407
WBGene00003755			WBGene00013668
WBGene00022383			WBGene00018862
WBGene00005684			WBGene00022465
WBGene00020696			WBGene00017800
WBGene00019979			WBGene00002008
WBGene00013013			WBGene00016790
WBGene00009838			WBGene00006353
WBGene00019471			WBGene00021797
WBGene00009947			WBGene00004393
WBGene00000012			WBGene00044734
WBGene00020386			WBGene00008502
WBGene00006594			WBGene00007447
WBGene00021157			WBGene00003555
WBGene00017781			WBGene00000567
WBGene00012152			WBGene00010015
WBGene00004004			WBGene00022631
WBGene00012629			WBGene00010899
WBGene00022539			WBGene00017853
WBGene00002260			WBGene00008765
WBGene00016914			WBGene00002255
WBGene00002253			WBGene00022732
WBGene00013577			WBGene00020954
WBGene00077771			WBGene00018809
WBGene00019449			WBGene00013116
WBGene00018637			WBGene00015950
WBGene00044917			WBGene00019769
WBGene00009201			WBGene00004378
WBGene00007218			WBGene00004115
WBGene00007858			WBGene00005552
WBGene00011583			WBGene00020887
WBGene00008412			WBGene00009493
WBGene00010666			WBGene00020862
WBGene00009554			WBGene00016411
WBGene00007340			WBGene00011812
WBGene00019841			WBGene00008034
WBGene00001516			WBGene00011776
WBGene00012582			WBGene00010386
WBGene00002106			WBGene00022722
WBGene00011984			WBGene00010459
WBGene00017478			WBGene00016461
WBGene00012910			WBGene00013448
WBGene00011392			WBGene00015684
WBGene00003091			WBGene00016769
WBGene00003903			WBGene00000793
WBGene00007877			WBGene00016837
WBGene00011957			WBGene00000467
WBGene00013643			WBGene00022045
WBGene00002974			WBGene00001476
WBGene00018268			WBGene00006927
WBGene00009586			WBGene00006515
WBGene00017333			WBGene00010844
WBGene00003497			WBGene00022663
WBGene00015062			WBGene00017431
WBGene00018035			WBGene00022856
WBGene00020618			WBGene00021743
WBGene00011372			WBGene00009230
WBGene00003749			WBGene00016129
WBGene00002089			WBGene00017010
WBGene00018515			WBGene00016376
WBGene00009778			WBGene00021602
WBGene00008116			WBGene00021123
WBGene00020971			WBGene00015017
WBGene00006999			WBGene00019813
WBGene00006063			WBGene00013474
WBGene00021543			WBGene00016892
WBGene00018903			WBGene00017780
WBGene00004184			WBGene00022350
WBGene00021703			WBGene00009124
WBGene00008211			WBGene00008431
WBGene00000288			WBGene00013392
WBGene00019211			WBGene00020131
WBGene00018506			WBGene00017574
WBGene00022797			WBGene00019214
WBGene00021898			WBGene00020358
WBGene00010012			WBGene00008749
WBGene00011399			WBGene00006577
WBGene00004228			WBGene00017690
WBGene00007058			WBGene00010130
WBGene00008577			WBGene00022382
WBGene00011844			WBGene00022176
WBGene00003759			WBGene00001112
WBGene00015286			WBGene00019029
WBGene00017464			WBGene00020587
WBGene00001990			WBGene00003123
WBGene00021521			WBGene00077593
WBGene00018384			WBGene00016158
WBGene00044242			WBGene00008053
WBGene00021478			WBGene00011879
WBGene00017297			WBGene00018409
WBGene00008505			WBGene00018934
WBGene00015027			WBGene00004955
WBGene00009722			WBGene00020418
WBGene00010004			WBGene00003640
WBGene00002131			WBGene00020048
WBGene00019666			WBGene00012747
WBGene00007072			WBGene00012911
WBGene00003736			WBGene00004392
WBGene00000719			WBGene00002138
WBGene00009512			WBGene00018885
WBGene00015019			WBGene00022850
WBGene00011770			WBGene00050955
WBGene00019518			WBGene00011758
WBGene00022194			WBGene00001468
WBGene00015045			WBGene00012032
WBGene00007313			WBGene00020228
WBGene00013111			WBGene00009710
WBGene00019962			WBGene00009101
WBGene00001779			WBGene00001431
WBGene00020550			WBGene00008354
WBGene00009476			WBGene00007537
WBGene00017243			WBGene00019895
WBGene00012141			WBGene00009563
WBGene00012176			WBGene00001784
WBGene00016093			WBGene00023483
WBGene00019156			WBGene00010983
WBGene00000671			WBGene00010205
WBGene00010727			WBGene00007152
WBGene00007142			WBGene00002070
WBGene00006649			WBGene00011182
WBGene00019649			WBGene00013980
WBGene00003449			WBGene00015509
WBGene00013060			WBGene00016788
WBGene00009081			WBGene00010258
WBGene00007473			WBGene00006440
WBGene00003722			WBGene00001997
WBGene00044605			WBGene00007368
WBGene00019021			WBGene00020759
WBGene00022002			WBGene00009880
WBGene00000883			WBGene00003950
WBGene00010589			WBGene00018335
WBGene00009393			WBGene00002001
WBGene00021366			WBGene00017283
WBGene00016292			WBGene00000067
WBGene00020139			WBGene00021321
WBGene00011097			WBGene00007876
WBGene00001454			WBGene00019402
WBGene00012554			WBGene00015581
WBGene00003682			WBGene00002075
WBGene00016522			WBGene00015608
WBGene00019909			WBGene00018342
WBGene00017233			WBGene00021073
WBGene00008228			WBGene00012358
WBGene00018756			WBGene00020028
WBGene00019655			WBGene00015839
WBGene00009888			WBGene00015631
WBGene00016738			WBGene00010847
WBGene00006310			WBGene00009161
WBGene00008395			WBGene00016460
WBGene00001169			WBGene00017012
WBGene00011009			WBGene00017875
WBGene00014152			WBGene00015665
WBGene00021260			WBGene00004120
WBGene00000065			WBGene00012110
WBGene00020046			WBGene00004315
WBGene00021220			WBGene00019380
WBGene00008490			WBGene00003475
WBGene00012443			WBGene00000116
WBGene00016281			WBGene00020915
WBGene00015227			WBGene00022534
WBGene00004889			WBGene00016120
WBGene00018282			WBGene00016412
WBGene00019939			WBGene00020263
WBGene00000733			WBGene00012647
WBGene00016734			WBGene00011107
WBGene00003471			WBGene00013275
WBGene00007247			WBGene00004887
WBGene00016150			WBGene00020034
WBGene00018345			WBGene00022021
WBGene00010058			WBGene00010339
WBGene00008963			WBGene00012136
WBGene00015583			WBGene00022584
WBGene00003643			WBGene00012530
WBGene00007855			WBGene00003785
WBGene00014826			WBGene00017005
WBGene00002017			WBGene00015803
WBGene00020590			WBGene00018625
WBGene00008575			WBGene00016159
WBGene00019859			WBGene00018319
WBGene00009839			WBGene00019767
WBGene00016266			WBGene00012240
WBGene00006862			WBGene00009354
WBGene00006660			WBGene00019457
WBGene00010085			WBGene00016379
WBGene00005983			WBGene00008936
WBGene00022582			WBGene00010495
WBGene00005642			WBGene00009665
WBGene00009077			WBGene00009564
WBGene00007886			WBGene00017658
WBGene00013898			WBGene00021190
WBGene00022178			WBGene00010479
WBGene00022336			WBGene00018698
WBGene00015059			WBGene00012604
WBGene00010610			WBGene00012660
WBGene00002188			WBGene00017163
WBGene00005433			WBGene00008476
WBGene00017838			WBGene00020015
WBGene00016706			WBGene00017738
WBGene00013840			WBGene00008143
WBGene00017653			WBGene00000393
WBGene00016110			WBGene00016395
WBGene00020215			WBGene00003625
WBGene00001994			WBGene00005160
WBGene00021407			WBGene00001566
WBGene00007653			WBGene00015256
WBGene00000135			WBGene00008010
WBGene00021981			WBGene00015910
WBGene00000981			WBGene00019605
WBGene00013515			WBGene00016795
WBGene00012915			WBGene00011033
WBGene00006820			WBGene00002201
WBGene00014187			WBGene00003837
WBGene00008295			WBGene00017356
WBGene00015876			WBGene00001050
WBGene00012750			WBGene00023422
WBGene00021909			WBGene00021311
WBGene00007992			WBGene00013701
WBGene00019182			WBGene00010178
WBGene00003710			WBGene00004358
WBGene00019789			WBGene00000483
WBGene00020861			WBGene00008921
WBGene00003515			WBGene00004981
WBGene00001711			WBGene00017632
WBGene00013570			WBGene00009030
WBGene00008059			WBGene00013729
WBGene00009221			WBGene00009204
WBGene00015434			WBGene00018597
WBGene00002026			WBGene00001829
WBGene00004758			WBGene00003773
WBGene00013904			WBGene00007705
WBGene00000703			WBGene00011064
WBGene00045183			WBGene00019673
WBGene00015660			WBGene00004746
WBGene00000732			WBGene00015565
WBGene00008745			WBGene00015802
WBGene00002242			WBGene00008218
WBGene00003733			WBGene00011908
WBGene00004097			WBGene00011906
WBGene00000932			WBGene00006593
WBGene00004311			WBGene00013761
WBGene00017945			WBGene00020631
WBGene00013023			WBGene00016602
WBGene00007791			WBGene00013607
WBGene00021159			WBGene00016156
WBGene00020881			WBGene00012645
WBGene00011681			WBGene00001511
WBGene00007228			WBGene00014106
WBGene00020104			WBGene00018278
WBGene00022572			WBGene00019934
WBGene00021835			WBGene00008733
WBGene00021872			WBGene00019736
WBGene00013963			WBGene00017025
WBGene00020592			WBGene00017636
WBGene00000534			WBGene00016145
WBGene00022179			WBGene00010341
WBGene00014252			WBGene00000098
WBGene00009106			WBGene00022860
WBGene00014053			WBGene00000383
WBGene00020844			WBGene00000784
WBGene00019187			WBGene00004100
WBGene00020063			WBGene00022258
WBGene00018405			WBGene00000275
WBGene00022144			WBGene00022463
WBGene00011672			WBGene00006893
WBGene00005703			WBGene00020037
WBGene00019436			WBGene00020107
WBGene00001202			WBGene00003246
WBGene00007566			WBGene00017830
WBGene00003452			WBGene00007615
WBGene00015294			WBGene00001827
WBGene00021487			WBGene00013321
WBGene00006539			WBGene00017553
WBGene00011593			WBGene00022801
WBGene00001457			WBGene00016714
WBGene00006570			WBGene00004895
WBGene00019178			WBGene00015734
WBGene00004986			WBGene00018874
WBGene00016981			WBGene00010941
WBGene00021566			WBGene00007832
WBGene00009806			WBGene00012109
WBGene00020732			WBGene00011926
WBGene00018146			WBGene00015956
WBGene00003990			WBGene00012451
WBGene00012424			WBGene00001029
WBGene00015700			WBGene00022888
WBGene00015262			WBGene00013042
WBGene00011452			WBGene00009145
WBGene00021883			WBGene00009192
WBGene00008859			WBGene00001983
WBGene00000526			WBGene00022078
WBGene00002129			WBGene00003789
WBGene00007679			WBGene00021680
WBGene00021158			WBGene00013496
WBGene00017108			WBGene00022864
WBGene00020279			WBGene00044063
WBGene00077761			WBGene00021651
WBGene00010789			WBGene00014219
WBGene00013572			WBGene00015710
WBGene00008060			WBGene00022882
WBGene00015440			WBGene00000178
WBGene00019946			WBGene00007018
WBGene00009957			WBGene00008665
WBGene00009440			WBGene00019406
WBGene00000217			WBGene00010405
WBGene00011099			WBGene00021715
WBGene00010440			WBGene00018007
WBGene00019016			WBGene00019771
WBGene00001753			WBGene00013762
WBGene00019466			WBGene00003132
WBGene00021397			WBGene00017867
WBGene00001502			WBGene00010624
WBGene00017504			WBGene00001477
WBGene00011021			WBGene00022579
WBGene00015867			WBGene00012135
WBGene00017265			WBGene00010057
WBGene00021894			WBGene00018101
WBGene00013737			WBGene00004189
WBGene00011522			WBGene00044469
WBGene00019047			WBGene00020798
WBGene00000775			WBGene00013128
WBGene00006479			WBGene00017002
WBGene00011573			WBGene00011308
WBGene00008170			WBGene00021869
WBGene00000768			WBGene00012300
WBGene00016194			WBGene00019361
WBGene00020211			WBGene00007236
WBGene00012158			WBGene00018827
WBGene00001461			WBGene00000163
WBGene00017470			WBGene00015270
WBGene00018656			WBGene00004340
WBGene00008323			WBGene00011806
WBGene00009958			WBGene00009620
WBGene00015544			WBGene00017435
WBGene00013848			WBGene00022496
WBGene00008454			WBGene00003764
WBGene00020981			WBGene00018595
WBGene00009387			WBGene00006307
WBGene00006754			WBGene00001571
WBGene00014000			WBGene00011231
WBGene00022501			WBGene00016326
WBGene00000454			WBGene00012803
WBGene00044404			WBGene00020788
WBGene00015954			WBGene00001070
WBGene00017654			WBGene00009965
WBGene00008897			WBGene00002152
WBGene00016378			WBGene00016333
WBGene00000950			WBGene00010456
WBGene00006760			WBGene00011190
WBGene00016018			WBGene00003958
WBGene00016539			WBGene00018864
WBGene00001649			WBGene00019604
WBGene00001767			WBGene00004326
WBGene00013485			WBGene00000502
WBGene00007691			WBGene00015814
WBGene00016970			WBGene00021132
WBGene00011753			WBGene00006997
WBGene00015492			WBGene00003418
WBGene00010501			WBGene00020669
WBGene00008979			WBGene00017679
WBGene00007288			WBGene00020445
WBGene00044889			WBGene00000182
WBGene00017717			WBGene00013931
WBGene00003739			WBGene00011076
WBGene00001887			WBGene00016418
WBGene00019106			WBGene00003843
WBGene00018250			WBGene00015461
WBGene00020339			WBGene00007647
WBGene00020195			WBGene00010104
WBGene00018403			WBGene00019460
WBGene00019111			WBGene00012234
WBGene00001730			WBGene00012342
WBGene00012448			WBGene00045457
WBGene00011997			WBGene00022188
WBGene00014175			WBGene00016508
WBGene00003546			WBGene00015557
WBGene00015726			WBGene00008277
WBGene00006226			WBGene00021742
WBGene00019888			WBGene00019089
WBGene00011158			WBGene00016261
WBGene00007697			WBGene00018978
WBGene00002132			WBGene00000854
WBGene00016686			WBGene00007683
WBGene00045356			WBGene00016282
WBGene00007091			WBGene00013038
WBGene00018043			WBGene00023423
WBGene00004192			WBGene00002071
WBGene00010343			WBGene00011230
WBGene00001945			WBGene00004013
WBGene00011682			WBGene00013608
WBGene00008593			WBGene00001523
WBGene00021326			WBGene00010850
WBGene00000251			WBGene00020383
WBGene00000728			WBGene00044315
WBGene00005270			WBGene00001877
WBGene00012869			WBGene00009239
WBGene00000370			WBGene00008781
WBGene00018766			WBGene00009925
WBGene00021486			WBGene00009980
WBGene00001129			WBGene00020919
WBGene00001621			WBGene00021766
WBGene00008497			WBGene00008924
WBGene00022070			WBGene00010328
WBGene00003766			WBGene00017300
WBGene00002176			WBGene00006933
WBGene00011108			WBGene00008664
WBGene00010488			WBGene00017105
WBGene00021048			WBGene00044332
WBGene00010614			WBGene00005826
WBGene00016484			WBGene00018930
WBGene00021264			WBGene00017799
WBGene00021406			WBGene00017829
WBGene00020697			WBGene00007043
WBGene00017578			WBGene00016607
WBGene00021339			WBGene00019902
WBGene00008168			WBGene00001393
WBGene00001172			WBGene00001005
WBGene00017637			WBGene00017680
WBGene00011286			WBGene00007087
WBGene00001764			WBGene00009128
WBGene00012143			WBGene00016450
WBGene00019098			WBGene00012824
WBGene00003166			WBGene00013652
WBGene00003610			WBGene00007545
WBGene00000216			WBGene00009477
WBGene00000670			WBGene00004337
WBGene00006815			WBGene00011366
WBGene00018044			WBGene00009069
WBGene00043984			WBGene00021660
WBGene00010224			WBGene00006607
WBGene00008198			WBGene00005002
WBGene00001758			WBGene00044636
WBGene00018054			WBGene00008084
WBGene00008320			WBGene00012947
WBGene00011106			WBGene00015233
WBGene00023172			WBGene00012213
WBGene00009001			WBGene00011929
WBGene00007141			WBGene00017499
WBGene00008369			WBGene00001785
WBGene00010918			WBGene00011375
WBGene00008322			WBGene00001860
WBGene00006163			WBGene00008694
WBGene00021915			WBGene00000409
WBGene00000224			WBGene00020223
WBGene00004212			WBGene00013336
WBGene00011270			WBGene00001102
WBGene00020082			WBGene00020982
WBGene00000742			WBGene00020156
WBGene00017808			WBGene00011759
WBGene00002048			WBGene00010641
WBGene00012062			WBGene00017448
WBGene00005007			WBGene00018430
WBGene00003225			WBGene00005662
WBGene00012778			WBGene00022031
WBGene00010299			WBGene00012123
WBGene00009848			WBGene00010619
WBGene00021623			WBGene00008528
WBGene00007916			WBGene00007609
WBGene00020801			WBGene00014063
WBGene00008792			WBGene00021354
WBGene00018099			WBGene00020348
WBGene00045215			WBGene00015021
WBGene00011671			WBGene00018895
WBGene00007598			WBGene00017098
WBGene00003752			WBGene00018964
WBGene00007408			WBGene00012933
WBGene00015781			WBGene00015469
WBGene00010169			WBGene00004110
WBGene00003084			WBGene00001027
WBGene00007725			WBGene00008768
WBGene00000554			WBGene00010569
WBGene00000237			WBGene00019062
WBGene00017850			WBGene00008117
WBGene00005735			WBGene00003009
WBGene00006640			WBGene00006856
WBGene00016187			WBGene00019712
WBGene00013104			WBGene00021930
WBGene00020873			WBGene00008674
WBGene00021544			WBGene00003095
WBGene00007993			WBGene00003934
WBGene00011643			WBGene00016387
WBGene00001236			WBGene00009207
WBGene00000942			WBGene00010353
WBGene00001462			WBGene00013566
WBGene00000207			WBGene00003518
WBGene00018093			WBGene00020054
WBGene00011639			WBGene00017546
WBGene00045180			WBGene00020935
WBGene00000899			WBGene00018045
WBGene00021035			WBGene00012013
WBGene00004145			WBGene00012106
WBGene00044738			WBGene00015310
WBGene00008450			WBGene00019757
WBGene00019845			WBGene00010629
WBGene00007324			WBGene00003601
WBGene00022142			WBGene00005762
WBGene00018804			WBGene00017345
WBGene00007881			WBGene00017642
WBGene00011595			WBGene00010284
WBGene00017715			WBGene00017216
WBGene00007267			WBGene00008069
WBGene00013973			WBGene00004416
WBGene00014697			WBGene00015382
WBGene00003535			WBGene00012916
WBGene00044548			WBGene00012138
WBGene00015252			WBGene00009535
WBGene00004369			WBGene00015011
WBGene00000421			WBGene00009701
WBGene00020118			WBGene00006740
WBGene00008464			WBGene00006844
WBGene00018857			WBGene00004024
WBGene00011750			WBGene00006977
WBGene00019070			WBGene00009943
WBGene00019112			WBGene00021464
WBGene00020297			WBGene00016420
WBGene00017599			WBGene00009744
WBGene00020185			WBGene00019433
WBGene00011292			WBGene00008923
WBGene00011571			WBGene00004221
WBGene00014093			WBGene00015128
WBGene00016417			WBGene00043156
WBGene00000743			WBGene00003707
WBGene00019816			WBGene00009012
WBGene00012885			WBGene00006718
WBGene00009268			WBGene00000213
WBGene00013859			WBGene00015023
WBGene00017979			WBGene00009179
WBGene00018771			WBGene00012450
WBGene00021895			WBGene00006586
WBGene00001109			WBGene00019658
WBGene00017314			WBGene00012231
WBGene00007517			WBGene00001584
WBGene00005430			WBGene00020120
WBGene00022200			WBGene00014223
WBGene00012425			WBGene00009985
WBGene00001531			WBGene00003522
WBGene00001750			WBGene00007282
WBGene00018732			WBGene00011747
WBGene00000952			WBGene00011036
WBGene00007044			WBGene00020507
WBGene00016785			WBGene00017452
WBGene00016828			WBGene00045490
WBGene00006975			WBGene00022752
WBGene00018590			WBGene00045479
WBGene00020892			WBGene00001230
WBGene00077684			WBGene00016737
WBGene00017959			WBGene00077490
WBGene00010518			WBGene00000262
WBGene00000282			WBGene00013233
WBGene00008967			WBGene00013438
WBGene00022675			WBGene00018925
WBGene00021531			WBGene00015881
WBGene00001178			WBGene00043707
WBGene00020341			WBGene00000122
WBGene00001644			WBGene00013698
WBGene00012144			WBGene00004180
WBGene00015261			WBGene00006911
WBGene00020157			WBGene00018166
WBGene00012605			WBGene00004006
WBGene00002107			WBGene00007742
WBGene00021134			WBGene00022880
WBGene00021873			WBGene00003090
WBGene00001955			WBGene00019076
WBGene00010879			WBGene00003413
WBGene00000204			WBGene00001600
WBGene00019022			WBGene00021193
WBGene00003173			WBGene00008852
WBGene00004751			WBGene00013360
WBGene00001404			WBGene00008107
WBGene00019286			WBGene00023409
WBGene00008052			WBGene00008366
WBGene00011534			WBGene00003400
WBGene00004321			WBGene00008669
WBGene00003729			WBGene00019157
WBGene00014262			WBGene00000254
WBGene00021527			WBGene00007538
WBGene00009835			WBGene00000500
WBGene00008031			WBGene00019766
WBGene00003676			WBGene00011340
WBGene00014194			WBGene00008400
WBGene00016255			WBGene00011916
WBGene00008592			WBGene00006784
WBGene00015887			WBGene00020453
WBGene00022185			WBGene00017705
WBGene00020960			WBGene00000871
WBGene00007397			WBGene00009634
WBGene00002113			WBGene00005012
WBGene00017572			WBGene00005023
WBGene00011830			WBGene00013073
WBGene00002262			WBGene00019729
WBGene00013458			WBGene00003495
WBGene00021947			WBGene00021558
WBGene00022563			WBGene00020678
WBGene00016006			WBGene00008774
WBGene00019663			WBGene00011229
WBGene00006794			WBGene00002223
WBGene00003969			WBGene00017339
WBGene00004927			WBGene00007248
WBGene00003584			WBGene00017286
WBGene00019204			WBGene00009141
WBGene00019656			WBGene00009595
WBGene00015879			WBGene00000095
WBGene00000115			WBGene00015853
WBGene00003179			WBGene00012341
WBGene00008844			WBGene00022754
WBGene00005303			WBGene00003157
WBGene00018060			WBGene00010540
WBGene00009877			WBGene00015905
WBGene00001158			WBGene00016534
WBGene00021516			WBGene00020701
WBGene00019748			WBGene00019659
WBGene00004364			WBGene00000767
WBGene00000057			WBGene00044283
WBGene00007057			WBGene00020007
WBGene00009816			WBGene00007740
WBGene00004987			WBGene00008131
WBGene00003235			WBGene00000236
WBGene00003876			WBGene00004243
WBGene00015551			WBGene00006492
WBGene00001559			WBGene00004166
WBGene00000660			WBGene00001832
WBGene00020805			WBGene00010500
WBGene00000198			WBGene00006976
WBGene00012548			WBGene00022046
WBGene00016514			WBGene00009285
WBGene00008270			WBGene00009588
WBGene00017841			WBGene00001028
WBGene00016768			WBGene00015369
WBGene00017618			WBGene00006473
WBGene00138714			WBGene00003800
WBGene00004279			WBGene00017816
WBGene00005844			WBGene00011972
WBGene00006780			WBGene00007677
WBGene00022744			WBGene00006618
WBGene00011554			WBGene00014141
WBGene00015117			WBGene00016249
WBGene00004382			WBGene00016303
WBGene00006254			WBGene00003230
WBGene00003404			WBGene00009352
WBGene00017200			WBGene00017998
WBGene00015433			WBGene00010560
WBGene00013366			WBGene00005521
WBGene00018568			WBGene00013383
WBGene00044792			WBGene00011808
WBGene00009572			WBGene00001099
WBGene00008681			WBGene00017102
WBGene00003907			WBGene00010231
WBGene00009809			WBGene00020205
WBGene00019368			WBGene00009448
WBGene00008370			WBGene00012029
WBGene00020950			WBGene00015860
WBGene00016516			WBGene00001497
WBGene00000726			WBGene00019788
WBGene00011335			WBGene00010234
WBGene00000614			WBGene00009203
WBGene00004990			WBGene00013436
WBGene00020275			WBGene00015211
WBGene00007466			WBGene00019058
WBGene00008037			WBGene00000514
WBGene00001464			WBGene00017226
WBGene00009119			WBGene00009485
WBGene00011313			WBGene00004312
WBGene00015293			WBGene00006061
WBGene00022825			WBGene00008561
WBGene00006066			WBGene00016157
WBGene00015510			WBGene00006510
WBGene00012813			WBGene00013024
WBGene00012759			WBGene00022792
WBGene00011577			WBGene00016766
WBGene00017610			WBGene00009966
WBGene00018263			WBGene00021828
WBGene00017836			WBGene00013740
WBGene00002239			WBGene00012922
WBGene00007898			WBGene00020422
WBGene00022391			WBGene00018498
WBGene00010117			WBGene00021589
WBGene00007986			WBGene00004245
WBGene00010507			WBGene00010421
WBGene00000063			WBGene00013695
WBGene00006863			WBGene00002007
WBGene00021921			WBGene00007429
WBGene00001560			WBGene00010361
WBGene00021942			WBGene00008932
WBGene00011551			WBGene00017782
WBGene00016630			WBGene00008789
WBGene00018861			WBGene00007315
WBGene00001398			WBGene00015815
WBGene00009895			WBGene00000426
WBGene00001588			WBGene00006382
WBGene00009528			WBGene00009758
WBGene00022324			WBGene00050892
WBGene00006419			WBGene00017066
WBGene00009632			WBGene00011415
WBGene00001899			WBGene00017096
WBGene00008825			WBGene00018009
WBGene00013295			WBGene00016958
WBGene00019652			WBGene00014042
WBGene00000641			WBGene00000386
WBGene00018614			WBGene00009885
WBGene00018284			WBGene00008486
WBGene00007339			WBGene00008646
WBGene00009358			WBGene00019762
WBGene00014259			WBGene00022689
WBGene00019160			WBGene00004493
WBGene00021731			WBGene00018371
WBGene00021457			WBGene00016421
WBGene00020142			WBGene00006442
WBGene00012686			WBGene00011034
WBGene00011580			WBGene00016621
WBGene00016934			WBGene00021294
WBGene00000667			WBGene00015206
WBGene00021593			WBGene00020311
WBGene00008747			WBGene00009347
WBGene00015753			WBGene00007412
WBGene00044347			WBGene00001776
WBGene00012589			WBGene00045498
WBGene00000693			WBGene00015156
WBGene00018434			WBGene00011348
WBGene00022202			WBGene00022044
WBGene00012594			WBGene00011638
WBGene00015735			WBGene00001263
WBGene00000170			WBGene00013559
WBGene00006509			WBGene00021470
WBGene00012439			WBGene00014999
WBGene00002016			WBGene00002024
WBGene00015866			WBGene00011376
WBGene00017489			WBGene00015582
WBGene00077762			WBGene00020207
WBGene00017663			WBGene00007874
WBGene00020143			WBGene00007871
WBGene00015788			WBGene00043985
WBGene00010936			WBGene00023503
WBGene00000879			WBGene00021187
WBGene00012606			WBGene00004217
WBGene00000951			WBGene00010989
WBGene00017529			WBGene00012253
WBGene00003444			WBGene00015007
WBGene00019375			WBGene00002080
WBGene00004083			WBGene00044107
WBGene00008895			WBGene00007627
WBGene00014096			WBGene00018512
WBGene00008986			WBGene00012471
WBGene00015253			WBGene00017275
WBGene00008334			WBGene00003586
WBGene00010868			WBGene00021537
WBGene00020025			WBGene00007443
WBGene00015748			WBGene00008411
WBGene00018579			WBGene00010621
WBGene00044087			WBGene00018950
WBGene00007285			WBGene00017308
WBGene00019263			WBGene00018853
WBGene00003464			WBGene00016154
WBGene00007937			WBGene00020346
WBGene00020137			WBGene00010657
WBGene00018465			WBGene00005150
WBGene00000822			WBGene00003982
WBGene00003688			WBGene00013932
WBGene00017936			WBGene00017001
WBGene00010809			WBGene00017584
WBGene00018113			WBGene00002169
WBGene00010667			WBGene00010960
WBGene00020149			WBGene00043537
WBGene00020226			WBGene00019307
WBGene00016092			WBGene00012151
WBGene00021253			WBGene00010061
WBGene00008985			WBGene00005484
WBGene00008889			WBGene00006438
WBGene00012035			WBGene00008877
WBGene00009662			WBGene00010684
WBGene00010653			WBGene00003520
WBGene00086563			WBGene00008499
WBGene00018610			WBGene00012260
WBGene00012512			WBGene00010340
WBGene00009380			WBGene00010325
WBGene00008626			WBGene00006739
WBGene00017671			WBGene00044099
WBGene00008239			WBGene00008385
WBGene00021969			WBGene00018897
WBGene00022328			WBGene00007042
WBGene00010411			WBGene00011917
WBGene00003685			WBGene00044321
WBGene00011436			WBGene00018417
WBGene00020406			WBGene00019640
WBGene00001065			WBGene00021317
WBGene00009386			WBGene00010645
WBGene00009085			WBGene00013394
WBGene00007405			WBGene00007274
WBGene00000593			WBGene00008387
WBGene00017013			WBGene00020717
WBGene00006424			WBGene00020456
WBGene00018406			WBGene00001817
WBGene00011186			WBGene00016189
WBGene00001888			WBGene00002046
WBGene00008435			WBGene00016874
WBGene00011817			WBGene00016325
WBGene00022274			WBGene00001395
WBGene00008842			WBGene00014124
WBGene00017257			WBGene00021499
WBGene00016509			WBGene00000264
WBGene00017865			WBGene00007186
WBGene00015376			WBGene00045050
WBGene00022325			WBGene00007918
WBGene00008233			WBGene00021248
WBGene00016556			WBGene00010638
WBGene00006527			WBGene00008553
WBGene00016178			WBGene00009691
WBGene00011680			WBGene00012633
WBGene00017350			WBGene00015362
WBGene00019846			WBGene00020326
WBGene00016207			WBGene00004775
WBGene00019844			WBGene00000430
WBGene00003000			WBGene00013234
WBGene00020335			WBGene00009501
WBGene00009790			WBGene00015146
WBGene00003569			WBGene00016731
WBGene00021340			WBGene00000746
WBGene00010890			WBGene00019931
WBGene00004317			WBGene00018025
WBGene00019568			WBGene00012546
WBGene00008796			WBGene00011773
WBGene00006368			WBGene00019791
WBGene00020076			WBGene00004297
WBGene00019514			WBGene00009373
WBGene00021576			WBGene00021520
WBGene00011732			WBGene00012337
WBGene00010095			WBGene00008878
WBGene00010736			WBGene00008422
WBGene00013784			WBGene00006645
WBGene00022285			WBGene00006726
WBGene00008315			WBGene00044638
WBGene00015381			WBGene00003154
WBGene00005228			WBGene00004958
WBGene00007963			WBGene00022375
WBGene00016389			WBGene00008677
WBGene00016212			WBGene00008776
WBGene00020385			WBGene00003507
WBGene00003468			WBGene00019984
WBGene00000068			WBGene00015702
WBGene00010525			WBGene00001031
WBGene00019450			WBGene00013092
WBGene00007295			WBGene00019940
WBGene00020597			WBGene00010616
WBGene00019964			WBGene00011122
WBGene00015179			WBGene00013653
WBGene00019091			WBGene00013956
WBGene00021428			WBGene00010136
WBGene00000714			WBGene00015091
WBGene00015951			WBGene00007393
WBGene00015088			WBGene00015025
WBGene00000069			WBGene00000939
WBGene00016858			WBGene00001568
WBGene00022656			WBGene00010953
WBGene00019653			WBGene00011962
WBGene00045387			WBGene00014119
WBGene00011726			WBGene00005291
WBGene00004485			WBGene00003020
WBGene00001152			WBGene00019998
WBGene00005148			WBGene00015034
			WBGene00001596
			WBGene00015229
			WBGene00012259
			WBGene00022232
			WBGene00010044
			WBGene00009685
			WBGene00001056
			WBGene00021141
			WBGene00018156
			WBGene00003561
			WBGene00013441
			WBGene00003953
			WBGene00022110
			WBGene00007258
			WBGene00016701
			WBGene00019148
			WBGene00003014
			WBGene00016408
			WBGene00008514
			WBGene00009116
			WBGene00021830
			WBGene00011488
			WBGene00021427
			WBGene00004753
			WBGene00009922
			WBGene00007112
			WBGene00015912
			WBGene00013710
			WBGene00002249
			WBGene00005467
			WBGene00018169
			WBGene00021015
			WBGene00004201
			WBGene00007366
			WBGene00004879
			WBGene00003635
			WBGene00015894
			WBGene00021352
			WBGene00006734
			WBGene00000101
			WBGene00015308
			WBGene00004461
			WBGene00006405
			WBGene00010636
			WBGene00011622
			WBGene00011839
			WBGene00013192
			WBGene00016844
			WBGene00000211
			WBGene00016335
			WBGene00003158
			WBGene00017732
			WBGene00016663
			WBGene00016140
			WBGene00010496
			WBGene00012591
			WBGene00008221
			WBGene00018017
			WBGene00009907
			WBGene00019933
			WBGene00020883
			WBGene00021109
			WBGene00019608
			WBGene00002225
			WBGene00010822
			WBGene00003825
			WBGene00016998
			WBGene00004152
			WBGene00021334
			WBGene00005019
