# Supplementary material for: エンドトキシン吸着療法(PMX) (特集 間質性肺炎治療法の新展開)
Source: eLife journal article supplement (doi:10.7554/elife.61459), 2010-04-01
Supplement: supp [file elife-61459-supp-v1.zip › elife_poa_e61459_Figure_2_figure_supplement_1_source_data_2.xlsx]

## Sheet: Sheet
Figure 2-figure supplement 1-Source Data 2: Comparison of DAF-16 and TCER-1 targets with functions in lipid metabolism from germ line-less glp-1(e2141ts) animals (Amrit et al. 2016) with differentially expressed genes in N2 PDStv to N2 CON (Ow et al. 2018).
Lipid Synthesis and Storage genes (Amrit et al. 2016)	PDstv (DE up) genes that overlap with Lipid Synthesis & Storage genes	Lipid Hydrolysis genes (Amrit et al. 2016)	PDstv (DE up) genes that overlap with Lipid Hydrolysis genes
WBGene00018657	WBGene00017012	WBGene00009952	WBGene00016943
WBGene00011106	WBGene00010296	WBGene00016943	WBGene00008564
WBGene00017012	WBGene00001240	WBGene00012860	WBGene00016716
WBGene00010296	WBGene00001394	WBGene00015894	WBGene00009221
WBGene00001239	WBGene00001397	WBGene00017874	WBGene00017012
WBGene00001240	WBGene00001399	WBGene00008564	WBGene00008167
WBGene00001394	WBGene00002891	WBGene00016716	WBGene00001156
WBGene00001397		WBGene00009221	WBGene00008567
WBGene00001399		WBGene00017012	WBGene00019978
WBGene00019464		WBGene00015484	WBGene00009773
WBGene00002891		WBGene00008167	WBGene00022642
WBGene00010408		WBGene00011122	WBGene00008803
WBGene00009439		WBGene00008629
WBGene00004076		WBGene00020347
WBGene00021818		WBGene00001156
		WBGene00008565
		WBGene00008566
		WBGene00008567
		WBGene00019978
		WBGene00010062
		WBGene00009773
		WBGene00022642
		WBGene00008803
		WBGene00019208
