# Supplementary material for: エンドトキシン吸着療法(PMX) (特集 間質性肺炎治療法の新展開)
Source: eLife journal article supplement (doi:10.7554/elife.61459), 2010-04-01
Supplement: supp [file elife-61459-supp-v1.zip › elife_poa_e61459_Figure_2_source_data_1.xlsx]

## Sheet: Data
Figure 2-Source Data 1: TCER-1 and KRI-1 regulate the decreased fecundity phenotype in PDStv adults
CON
Strain	Mean brood size	Maximum brood size	Minimum brood size	Standard Error of Mean	Number of biological replicates	Total sample size
N2	281.2	384	143	4.114	14	139
CB1375 daf-18(e1375)	225.7	394	0	11.93	6	58
SH350 pqm-1(ok485)	282.8	354	181	6.128	4	40
SH312 daf-16(mu86); daf-16AM::gfp	187.3	252	103	7.002	3	30
SP488 smk-1(mn156)	217.1	332	0	14.69	3	29
CF2052 kri-1(ok1251)	151.6	218	77	6.945	3	30
CF2167 tcer-1(tm1452)	74.86	214	0	11.43	3	29
PDstv
Strain	Mean brood size	Maximum brood size	Minimum brood size	Standard Error of Mean	Number of biological replicates	Total sample size
N2	232.1	402	27	6.125	14	130
CB1375 daf-18(e1375)	175	263	68	6.543	6	55
SH350 pqm-1(ok485)	241	328	124	7.887	4	40
SH312 daf-16(mu86); daf-16AM::gfp	142	267	4	13.28	3	30
SP488 smk-1(mn156)	145.9	304	3	15.16	3	30
CF2052 kri-1(ok1251)	148.4	247	25	9.728	3	30
CF2167 tcer-1(tm1452)	110.2	251	0	13.81	3	30
Brood size
N2 CON	N2 PDstv	CB1375 daf-18(e1375) CON	CB1375 daf-18(e1375) PDstv	SH350 pqm-1(ok485) CON	SH350 pqm-1(ok485) PDstv	SH312 daf-16(mu86); daf-16AM::gfp CON	SH312 daf-16(mu86); daf-16AM::gfp PDstv	SP488 smk-1(mn156) CON	SP488 smk-1(mn156) PDstv	CF2052 kri-1(ok1251) CON	CF2052 kri-1(ok1251) PDstv	CF2167 tcer-1(tm1452) CON	CF2167 tcer-1(tm1452) PDstv
269	289	298	241	301	265	186	154	283	301	77	94	44	34
260	363	276	114	273	293	170	86	271	170	107	171	29	125
244	285	283	159	318	292	176	169	214	57	158	170	115	153
266	342	276	212	265	284	148	166	248	250	168	195	98	104
247	331	335	245	317	313	192	134	268	241	138	102	129	165
274	253	289	220	200	328	161	101	268	67	158	168	127	187
230	161	171	263	274	201	172	143	304	28	122	193	1	0
290	291	6	255	300	251	169	77	228	304	146	161	96	228
245	286	168	214	253	305	201	204	264	119	140	167	26	40
305	310	264	211	338	180	103	201	332	206	95	171	120	204
353	199	41	167	271	246	173	41	147	164	154	247	45	69
240	194	221	70	248	240	183	164	253	183	163	164	101	0
335	63	293	139	305	255	221	56	209	243	206	207	29	219
242	304	338	186	300	124	219	148	154	166	133	183	0	56
294	241	187	161	274	239	191	217	233	157	193	141	21	133
293	182	262	179	263	170	175	118	247	232	204	172	4	122
231	195	306	140	253	258	111	164	44	262	206	206	182	194
250	196	110	233	314	194	226	194	210	79	165	154	214	182
228	187	336	99	292	207	141	211	237	201	156	221	0	67
273	259	202	203	259	238	120	222	256	159	142	221	178	54
339	174	0	203	216	200	164	254	206	96	218	145	93	121
348	173	10	188	314	226	237	166	0	73	209	126	170	151
345	281	106	119	262	161	183	78	6	120	135	120	107	156
374	257	140	129	284	208	252	267	266	39	126	70	41	3
278	262	282	207	326	240	231	176	237	115	134	121	63	5
300	256	131	193	307	270	225	225	242	3	183	104	0	6
358	367	273	160	276	263	220	4	220	56	126	99	65	251
359	309	120	116	256	212	230	101	215	70	93	54	47	70
330	200	203	68	354	310	219	8	233	108	100	25	26	148
271	195	285	238	287	327	221	10		109	194	79		58
227	244			321	241
312	248			228	267
313	170			254	242
312	295			250	292
308	221			289	170
331	259			351	246
328	343			292	245
301	298			308	165
318	221			336	178
278	314			181	292
258	208
193	180
231	255
247	187
247	277
261	184
262	249
340	145
143	218
324	310
258	208
304	269
341	188
309	273
301	237
231	195
206	301
292	169
321	193
213	145
340	241
320	175
377	119
228	168
153	146
264	155
178	259
143	196
330	154
343	164
325	402
296	159
272	265
352	348
263	274
291	72
281	260
384	116
346	141
280	105
254	195
303	314
343	300
376	294
343	266
322	336
329	271
258	308
332	311
271	207
266	279
251	231
249	213
276	27
305	253
238	300
273	197
272	191
257	279
317	148
284	291
246	148
345	160
208	98
245	271
318	206
173	259
246	249
265	231
249	268
308	305
170	169
261	260
233	235
264	184
283	241
305	174
268	94
323	131
307	153
278	328
310	303
243	340
262	207
261	286
252	314
296	260
249	311
272	182
281	271
345
285
295
272
233
207
306
243
320

## Sheet: Statistical analysis
Statistical analysis
Šídák's multiple comparisons test	Mean Diff.	95.00% CI of diff.	Below threshold?	Summary	Adjusted P Value
N2 CON vs. N2 PDStv	49.11	28.61 to 69.62	Yes	****	<0.0001
daf-18(e1375) CON vs. daf-18(e1375) PDStv	50.71	19.08 to 82.34	Yes	***	0.0001
pqm-1(ok485) CON vs. pqm-1(ok485) PDStv	41.8	4.226 to 79.37	Yes	*	0.0198
daf-16(mu86) I; muEx158 [daf-16AM::gfp + sur-5p::gfp] CON vs. daf-16(mu86) I; muEx158 [daf-16AM::gfp + sur-5p::gfp] PDStv	45.37	1.980 to 88.75	Yes	*	0.0347
smk-1(mn156) CON vs. smk-1(mn156) PDStv	71.14	27.38 to 114.9	Yes	****	<0.0001
kri-1(ok1251) CON vs. kri-1(ok1251) PDStv	3.267	-40.12 to 46.65	No	ns	>0.9999
tcer-1(tm1425) CON vs. tcer-1(tm1425) PDStv	-35.3	-79.06 to 8.455	No	ns	0.1936
N2 CON vs. daf-18(e1375) CON	55.57	29.81 to 81.33	Yes	****	<0.0001
N2 CON vs. pqm-1(ok485) CON	-1.505	-31.07 to 28.06	No	ns	>0.9999
N2 CON vs. daf-16(mu86) I; muEx158 [daf-16AM::gfp + sur-5p::gfp] CON	93.91	60.74 to 127.1	Yes	****	<0.0001
N2 CON vs. smk-1(mn156) CON	64.18	30.54 to 97.82	Yes	****	<0.0001
N2 CON vs. kri-1(ok1251) CON	129.6	96.44 to 162.8	Yes	****	<0.0001
N2 CON vs. tcer-1(tm1425) CON	206.4	172.7 to 240.0	Yes	****	<0.0001
N2 PDStv vs. daf-18(e1375) PDStv	57.17	30.66 to 83.67	Yes	****	<0.0001
N2 PDStv vs. pqm-1(ok485) PDStv	-8.819	-38.61 to 20.97	No	ns	0.9675
N2 PDStv vs. daf-16(mu86) I; muEx158 [daf-16AM::gfp + sur-5p::gfp] PDStv	90.16	56.79 to 123.5	Yes	****	<0.0001
N2 PDStv vs. smk-1(mn156) PDStv	86.2	52.82 to 119.6	Yes	****	<0.0001
N2 PDStv vs. kri-1(ok1251) PDStv	83.76	50.39 to 117.1	Yes	****	<0.0001
N2 PDStv vs. tcer-1(tm1425) PDStv	122	88.59 to 155.3	Yes	****	<0.0001
