# Supplementary material for: エンドトキシン吸着療法(PMX) (特集 間質性肺炎治療法の新展開)
Source: eLife journal article supplement (doi:10.7554/elife.61459), 2010-04-01
Supplement: supp [file elife-61459-supp-v1.zip › elife_poa_e61459_Figure_3_source_data_1.xlsx]

## Sheet: Data
Figure 3-Source Data 1: Fatty acid metabolism pathways modulate adult reproductive plasticity.
CON
Strain	Mean brood size	Maximum brood size	Minimum brood size	Standard Error of Mean	Number of biological replicates	Total sample size
N2	292.2	384	75	4.388	15	133
STE68 nhr-49(nr2041)	215.8	296	110	8.006	3	29
SH344 nhr-49(ok2165)	235.3	339	178	7.334	3	30
SH343 nhr-49(gk405)	230.7	286	86	8.647	3	30
SH319 nhr-49(et8)	228.6	300	39	10.83	3	30
SH327 nhr-49(et7)	237.3	340	0	12.06	3	29
SH326 nhr-49(et13)	206	236	137	4.679	3	30
STE70 nhr-80(tm1011)	238.7	327	1	10.95	4	42
SH301 nhr-13(gk796)	321.5	408	235	8.617	3	30
STE69 nhr-66(ok940)	225.4	313	38	9.713	4	40
XA7702 mdt-15(tm2182)	19.13	54	0	2.894	3	30
CE541 sbp-1(ep79)	30.73	104	1	4.512	3	30
PDstv
Strain	Mean brood size	Maximum brood size	Minimum brood size	Standard Error of Mean	Number of biological replicates	Total sample size
N2	231.9	402	3	6.398	15	131
STE68 nhr-49(nr2041)	208.4	347	65	13.47	3	29
SH344 nhr-49(ok2165)	136.2	264	6	12.54	3	30
SH343 nhr-49(gk405)	244.6	314	72	10.15	3	30
SH319 nhr-49(et8)	190.7	275	113	7.938	3	29
SH327 nhr-49(et7)	181.2	244	0	8.268	3	30
SH326 nhr-49(et13)	134.6	222	5	8.957	3	30
STE70 nhr-80(tm1011)	114.1	300.3	11	11.1	4	43
SH301 nhr-13(gk796)	254.7	369	130	11.31	3	29
STE69 nhr-66(ok940)	193.6	279	65	7.711	4	40
XA7702 mdt-15(tm2182)	1.433	15	0	0.5481	3	30
CE541 sbp-1(ep79)	37.13	78	6	3.366	3	30
Brood size
N2 CON	N2 PDstv	STE68 nhr-49(nr2041) CON	STE68 nhr-49(nr2041) PDstv	SH344 nhr-49(ok2165) CON	SH344 nhr-49(ok2165) PDstv	SH343 nhr-49(gk405) CON	SH343 nhr-49(gk405) PDstv	SH319 nhr-49(et8) CON	SH319 nhr-49(et8) PDstv	SH327 nhr-49(et7) CON	SH327 nhr-49(et7) PDstv	SH326 nhr-49(et13) CON	SH326 nhr-49(et13) PDstv	STE70 nhr-80(tm1011) CON	STE70 nhr-80(tm1011) PDstv
248	206	203	65	227	208	166	263	285	127	269	0
308.667	136.5	208	92	197	100	262	280	285	180	257	197	227	110	283	300.333
213.667	257.333	218	134	211	144	228	270	274	236	316	196	224	59	262.667	272.667
279	284	213	111	268	75	211	292	290	182	296	108	217	5	273	294.25
277.25	260.25	110	233	181	195	86	252	251	229	268	182	228	153	279	138
249	311	189	184	226	109	252	273	252	142	216	152	235	144	110	11	SH301 nhr-13(gk796) CON	SH301 nhr-13(gk796) PDstv	STE69 nhr-66(ok940) CON	STE69 nhr-66(ok940) PDstv	XA7702 mdt-15(tm2182) CON	XA7702 mdt-15(tm2182) PDstv	CE541 sbp-1(ep79) CON	CE541 sbp-1(ep79) PDstv
328	261	211	181	192	83	213	289	282	216	240	154	191	58	144	69
286	240	217	224	221	195	225	246	266	263	340	167	235	173	278	161	297	338	255	202	10	15	8	78
290	237	241	121	180	238	232	247	240	275	284	175	225	161	275	80	272	301	269	279	22	0	17	58
378	262	227	132	186	125	252	314	261	191	235	203	193	121	253	47	244	229	238	200	50	3	1	6
264	265	118	317	190	155	273	279	149	176	246	193	226	134	232	58	315	248	210	225	7	0	35	37
274	362	165	347	245	142	245	246	300	157	218	165	236	110	301	99	255	369	260	203	3	5	8	43
371	281	270	221	207	70	208	72	262	143	255	206	187	161	206	34	286	224	249	201	2	0	25	11
311	304	193	185	270	109	228	201	129	224	247	149	229	79	301	90	336	243	244	275	38	4	20	35
309	232	273	303	279	60	237	130	237	211	204	176	171	129	236	90	295	298	278	196	4	0	18	17
260	243	296	238	339	228	286	238	252	190	226	225	220	179	251	53	249	341	239	217	8	1	35	18
329	206	160	279	234	6	265	274	189	214	237	168	224	167	292	27	247	170	280	267	54	3	21	21
219	298	231	255	237	87	275	275	237	226	240	147	211	104	303	206	341	243	203	239	29	0	60	26
332	106	252	269	287	219	120	176	39	229	230	208	205	161	305	186	347	192	207	197	0	1	27	58
320	177	256	300	192	38	149	256	231	152	85	162	223	111	150	23	366	171	157	192	0	0	5	24
295	187	236	194	242	197	255	250	137	200	292	219	182	168	119	83	331	277	240	217	43	0	15	20
313	136	199	265	301	113	262	259	236	227	0	216	202	161	243	137	345	291	256	195	25	0	5	20
313	261	228	240	262	264	265	296	137	156	168	244	230	222	222	147	367	315	235	172	40	0	26	18
313	138	246	107	247	196	264	254	205	113	231	211	188	163	1	99	354	242	254	97	15	0	20	46
265	129	185	252	243	117	272	267	193	242	272	220	194	24	327	53	369	260	251	214	0	0	30	20
300	165	198	189	266	211	256	284	225	156	257	165	222	163	279	11	408	352	251	250	46	0	28	60
363	199	238	168	269	187	272	228	272	154	236	199	173	177	233	139	336	248	265	245	23	0	20	46
324	65	277	181	220	108	191	139	273	125	238	207	137	152	287	102	312	327	293	139	13	1	88	33
273	355	199	258	178	15	229	308	243	193	280	209	168	158	299	175	303	231	234	182	30	5	26	56
316	193			263	93	242	179	225			214	212	182	94	179	374	284	53	194	6	0	104	31
318	168											164	149	327	82	390	206	253	65	15	0	57	48
231	111													243	136	342	200	142	178	14	0	67	53
295	293													251	23	235	269	245	121	20	3	40	34
289	183													199	142	384	130	146	141	11	0	61	64
262	176													260	83	309	225	282	211	15	1	28	48
370	232													262	236	291	162	165	189	7	0	23	24
272	253													238	110	346		38	238	24	1	4	61
356	266													271	99			238	247
329	279													263	107			311	185
267	376													254	102			147	190
223	398													88	178			226	120
236	199													266	118			261	114
294	304													266	26			313	253
326	245														100			207	147
136	262																	272	203
291	213																	222	146
351	334																	127	198
205	227
319	270
267	148
327	273
376	268
106	3
366	201
273	222
303	330
276	192
312	130
262	188
75	169
316	270
286	29
243	122
263	262
191	232
273	254
239	180
298	200
345	209
328	94
339	203
275	329
281	272
336	249
248	292
296	239
295	211
272	258
294	232
286	290
257	189
273	292
275	234
307	290
375	249
345	302
356	210
350	241
376	224
353	292
307	269
291	257
372	274
299	228
267	184
310	294
259	277
264	247
260	228
183	325
286	321
314	236
300	309
343	119
325	168
296	146
272	155
352	259
263	196
291	154
281	164
384	402
346	159
280	265
254	348
303	274
343	72
376	260
343	116
322	141
329	105
258	195
332	314
271	300
266	294
251	266
249	336
276	271
305	308
238	311
273	207
272
257

## Sheet: Statistical analysis
Statistical analysis
Šídák's multiple comparisons test	Mean Diff.	95.00% CI of diff.	Below threshold?	Summary	Adjusted P Value
N2 CON vs. N2 PDStv	60.38	41.08 to 79.68	Yes	****	<0.0001
nhr-49(nr2041) CON vs. nhr-49(nr2041) PDStv	7.31	-33.86 to 48.48	No	ns	>0.9999
nhr-49(ok2165) CON vs. nhr-49(ok2165) PDStv	99.1	58.62 to 139.6	Yes	****	<0.0001
nhr-49(gk405) CON vs. nhr-49(gk405) PDStv	-13.87	-54.35 to 26.62	No	ns	0.9913
nhr-49(et8) CON vs. nhr-49(et8) PDStv	36.87	-3.284 to 77.02	No	ns	0.0992
nhr-49(et7) CON vs. nhr-49(et7) PDStv	58.16	18.65 to 97.67	Yes	***	0.0003
nhr-49(et13) CON vs. nhr-49(et13) PDStv	71.37	32.77 to 110.0	Yes	****	<0.0001
nhr-80(tm1011) CON vs. nhr-80(tm1011) PDStv	125.5	91.73 to 159.4	Yes	****	<0.0001
nhr-13(gk796) CON vs. nhr-13(gk796) PDStv	66.84	26.01 to 107.7	Yes	****	<0.0001
nhr-66(ok940) CON vs. nhr-66(ok940) PDStv	31.33	-2.486 to 65.14	No	ns	0.0928
mdt-15(tm2182) CON vs. mdt-15(tm2182) PDStv	17.7	-22.78 to 58.18	No	ns	0.9415
sbp-1(ep79) CON vs. sbp-1(ep79) PDStv	-6.4	-46.88 to 34.08	No	ns	>0.9999
N2 CON vs. nhr-49(nr2041) CON	76.49	44.67 to 108.3	Yes	****	<0.0001
N2 CON vs. nhr-49(ok2165) CON	56.91	25.53 to 88.29	Yes	****	<0.0001
N2 CON vs. nhr-49(gk405) CON	61.54	30.16 to 92.93	Yes	****	<0.0001
N2 CON vs. nhr-49(et8) CON	64.52	33.55 to 95.49	Yes	****	<0.0001
N2 CON vs. nhr-49(et7) CON	53.76	22.79 to 84.73	Yes	****	<0.0001
N2 CON vs. nhr-49(et13) CON	86.28	56.08 to 116.5	Yes	****	<0.0001
N2 CON vs. nhr-80(tm1011) CON	52.72	25.48 to 79.96	Yes	****	<0.0001
N2 CON vs. nhr-13(gk796) CON	-29.29	-60.67 to 2.094	No	ns	0.087
N2 CON vs. nhr-66(ok940) CON	67.01	39.77 to 94.25	Yes	****	<0.0001
N2 CON vs. mdt-15(tm2182) CON	273.1	241.7 to 304.5	Yes	****	<0.0001
N2 CON vs. sbp-1(ep79) CON	261.5	230.1 to 292.9	Yes	****	<0.0001
N2 PDStv vs. nhr-49(nr2041) PDStv	23.41	-8.449 to 55.28	No	ns	0.3422
N2 PDStv vs. nhr-49(ok2165) PDStv	95.63	64.20 to 127.1	Yes	****	<0.0001
N2 PDStv vs. nhr-49(gk405) PDStv	-12.7	-44.13 to 18.72	No	ns	0.9588
N2 PDStv vs. nhr-49(et8) PDStv	41.01	9.582 to 72.43	Yes	**	0.0025
N2 PDStv vs. nhr-49(et7) PDStv	51.54	20.92 to 82.16	Yes	****	<0.0001
N2 PDStv vs. nhr-49(et13) PDStv	97.26	67.02 to 127.5	Yes	****	<0.0001
N2 PDStv vs. nhr-80(tm1011) PDStv	117.9	90.60 to 145.2	Yes	****	<0.0001
N2 PDStv vs. nhr-13(gk796) PDStv	-22.83	-54.69 to 9.037	No	ns	0.3791
N2 PDStv vs. nhr-66(ok940) PDStv	37.95	10.67 to 65.24	Yes	***	0.0009
N2 PDStv vs. mdt-15(tm2182) PDStv	230.4	199.0 to 261.9	Yes	****	<0.0001
N2 PDStv vs. sbp-1(ep79) PDStv	194.7	163.3 to 226.2	Yes	****	<0.0001
