# Supplementary material for: エンドトキシン吸着療法(PMX) (特集 間質性肺炎治療法の新展開)
Source: eLife journal article supplement (doi:10.7554/elife.61459), 2010-04-01
Supplement: supp [file elife-61459-supp-v1.zip › elife_poa_e61459_Figure_3_source_data_2.xlsx]

## Sheet: Data
Figure 3-Source Data 2: Fatty acid metabolism pathways modulate adult reproductive plasticity.
CON
Strain	Mean brood size	Maximum brood size	Minimum brood size	Standard Error of Mean	Number of biological replicates	Total sample size
N2	286.9	376	75	7.664	6	60
SH302 nhr-49(nr2041); nhr-80(tm1011)	200.1	305	82	9.095	3	30
STE73 nhr-80(tm1011); nhr-13(gk796)	278.1	347	181	8.326	3	30
SH303 nhr-49(nr2041); nhr-13(gk796)	222.6	320	2	10.14	3	30
SH304 nhr-49(nr2041); nhr-80(tm1011); nhr-13(gk796)	185.3	225	124	4.439	3	30
SH342 nhr-49(nr2041); nhr-66(ok940)	195.6	269	104	6.226	3	30
PDstv
Strain	Mean brood size	Maximum brood size	Minimum brood size	Standard Error of Mean	Number of biological replicates	Total sample size
N2	225.5	378	3	9.703	6	58
SH302 nhr-49(nr2041); nhr-80(tm1011)	173.2	336	70	10.4	3	30
STE73 nhr-80(tm1011); nhr-13(gk796)	192.5	335	62	11.26	3	30
SH303 nhr-49(nr2041); nhr-13(gk796)	244	329	142	8.728	3	39
SH304 nhr-49(nr2041); nhr-80(tm1011); nhr-13(gk796)	171.5	256	16	9.502	3	30
SH342 nhr-49(nr2041); nhr-66(ok940)	178.5	318	99	8.889	3	30
Brood size
N2 CON	N2 PDstv	SH302 nhr-49(nr2041); nhr-80(tm1011) CON	SH302 nhr-49(nr2041); nhr-80(tm1011) PDstv	STE73 nhr-80(tm1011); nhr-13(gk796) CON	STE73 nhr-80(tm1011); nhr-13(gk796) PDstv	SH303 nhr-49(nr2041); nhr-13(gk796) CON	SH303 nhr-49(nr2041); nhr-13(gk796) PDstv	SH304 nhr-49(nr2041); nhr-80(tm1011); nhr-13(gk796) CON	SH304 nhr-49(nr2041); nhr-80(tm1011); nhr-13(gk796) PDstv	SH342 nhr-49(nr2041); nhr-66(ok940) CON	SH342 nhr-49(nr2041); nhr-66(ok940) PDstv
343	77	216	181	313	197	207	226	171	16	122	208
291	235	82	278	295	216	186	166	178	161	218	104
271	177	199	188	312	188	242	142	180	132	269	131
299	270	241	74	287	235	209	259	187	230	202	146
296	293	152	100	307	107	230	230	195	235	242	128
291	378	204	151	307	164	2	189	172	72	226	155
283	288	238	210	286	128	200	189	175	121	192	228
309	208	214	82	181	158	272	281	193	148	176	166
310	208	247	168	253	234	206	250	201	256	180	130
277	315	206	184	242	224	243	236	124	177	104	149
148	326	138	176	288	171	115	249	126	127	198	164
346	254	171	139	224	246	179	289	217	248	227	214
329	160	122	165	288	195	267	226	184	160	156	257
362	259	227	195	246	180	243	329	156	238	181	144
341	180	193	174	346	190	239	250	222	147	224	218
342	276	250	235	201	182	270	174	158	189	186	153
314	330	130	70	283	91	215	317	189	184	227	170
329	213	194	209	347	149	263	232	197	172	208	208
332	142	305	163	344	153	239	296	195	195	181	185
342	181	175	197	315	203	274	184	202	148	242	158
136	213	269	141	317	207	247	241	165	130	195	99
291	334	266	143	277	138	320	290	177	157	189	248
351	227	144	149	248	236	240	301	186	230	193	186
205	270	221	181	313	304	202	217	176	166	166	156
319	148	202	136	228	62	235	323	217	164	204	149
267	273	185	223	202	335	226	254	225	220	210	181
327	268	236	134	227	167	248	228	182	213	207	318
376	3	140	173	291	263	225	274	190	178	156	241
106	201	198	336	334	302	227	267	213	144	203	151
366	222	238	242	240	151	207	211	207	186	184	209
273	330
303	192
276	130
312	188
262	169
75	270
316	29
286	122
243	262
263	232
191	254
273	180
239	200
298	209
345	94
328	203
339	329
275	272
281	249
336	292
248	239
296	211
295	258
272	232
294	290
286	189
257	292
273	234
275
307

## Sheet: Statistical analysis
Statistical analysis
Šídák's multiple comparisons test	Mean Diff.	95.00% CI of diff.	Below threshold?	Summary	Adjusted P Value
N2 CON vs. N2 PDStv	61.42	34.91 to 87.93	Yes	****	<0.0001
nhr-80(tm1011); nhr-49(nr2041) CON vs. nhr-80(tm1011); nhr-49(nr2041) PDStv	26.87	-10.31 to 64.04	No	ns	0.2956
nhr-80(tm1011); nhr-13(gk796) CON vs. nhr-80(tm1011); nhr-13(gk796) PDStv	85.53	48.36 to 122.7	Yes	****	<0.0001
nhr-49(nr2041); nhr-13(gk796) CON vs. nhr-49(nr2041); nhr-13(gk796) PDStv	-21.4	-58.57 to 15.77	No	ns	0.5627
nhr-49(nr2041); nhr-80(tm1011); nhr-13(gk796) CON vs. nhr-49(nr2041); nhr-80(tm1011); nhr-13(gk796) PDStv	13.87	-23.31 to 51.04	No	ns	0.9051
nhr-66(ok940); nhr-49(nr2041) CON vs. nhr-66(ok940); nhr-49(nr2041) PDStv	17.09	-19.47 to 53.66	No	ns	0.77
N2 CON vs. nhr-80(tm1011); nhr-49(nr2041) CON	86.83	55.41 to 118.3	Yes	****	<0.0001
N2 CON vs. nhr-80(tm1011); nhr-13(gk796) CON	8.867	-22.56 to 40.29	No	ns	0.9569
N2 CON vs. nhr-49(nr2041); nhr-13(gk796) CON	64.33	32.91 to 95.76	Yes	****	<0.0001
N2 CON vs. nhr-49(nr2041); nhr-80(tm1011); nhr-13(gk796) CON	101.6	70.18 to 133.0	Yes	****	<0.0001
N2 CON vs. nhr-66(ok940); nhr-49(nr2041) CON	91.09	60.01 to 122.2	Yes	****	<0.0001
N2 PDStv vs. nhr-80(tm1011); nhr-49(nr2041) PDStv	52.28	20.68 to 83.89	Yes	***	0.0001
N2 PDStv vs. nhr-80(tm1011); nhr-13(gk796) PDStv	32.98	1.380 to 64.59	Yes	*	0.0363
N2 PDStv vs. nhr-49(nr2041); nhr-13(gk796) PDStv	-18.48	-50.09 to 13.12	No	ns	0.5073
N2 PDStv vs. nhr-49(nr2041); nhr-80(tm1011); nhr-13(gk796) PDStv	54.05	22.45 to 85.65	Yes	****	<0.0001
N2 PDStv vs. nhr-66(ok940); nhr-49(nr2041) PDStv	46.77	15.51 to 78.04	Yes	***	0.0007
