# Supplementary material for: エンドトキシン吸着療法(PMX) (特集 間質性肺炎治療法の新展開)
Source: eLife journal article supplement (doi:10.7554/elife.61459), 2010-04-01
Supplement: supp [file elife-61459-supp-v1.zip › elife_poa_e61459_Figure_3_source_data_3.xlsx]

## Sheet: Data
Figure 3-Source Data 3: Fatty acid metabolism pathways modulate adult reproductive plasticity.
CON
Strain	Mean brood size	Maximum brood size	Minimum brood size	Standard Error of Mean	Number of biological replicates	Total sample size
N2	299.4	376	75	6.706	8	79
BX106 fat-6(tm331)	248.8	314	207	5.018	3	30
BX107 fat-5(tm420)	261	344	80	9.811	3	30
BX153 fat-7(wa36)	230.9	283	51	8.207	3	30
BX26 fat-2(wa17)	50.68	119	0	6.237	3	28
BX110 fat-6(tm331); fat-5(tm420)	261.8	352	208	6.618	3	30
BX160 fat-7(wa36); fat-5(tm420)	229.4	293	105	8.125	3	30
BX156 fat-6(tm331); fat-7(wa36)	25.03	77	4	2.789	3	30
PDstv
Strain	Mean brood size	Maximum brood size	Minimum brood size	Standard Error of Mean	Number of biological replicates	Total sample size
N2	225.5	367	3	7.849	8	78
BX106 fat-6(tm331)	228.6	319	161	6.982	3	30
BX107 fat-5(tm420)	137	203	77	6.917	3	30
BX153 fat-7(wa36)	152.9	274	6	11.81	3	30
BX26 fat-2(wa17)	18.5	149	0	5.459	3	30
BX110 fat-6(tm331); fat-5(tm420)	261.4	323	185	6.487	3	30
BX160 fat-7(wa36); fat-5(tm420)	204.3	284	82	8.151	3	30
BX156 fat-6(tm331); fat-7(wa36)	26.3	66	2	2.708	3	30
Brood size
N2 CON	N2 PDstv	BX106 fat-6(tm331) CON	BX106 fat-6(tm331) PDstv	BX107 fat-5(tm420) CON	BX107 fat-5(tm420) PDstv	BX153 fat-7(wa36) CON	BX153 fat-7(wa36) PDstv	BX26 fat-2(wa17) CON	BX26 fat-2(wa17) PDstv	BX110 fat-6(tm331); fat-5(tm420) CON	BX110 fat-6(tm331); fat-5(tm420) PDstv	BX160 fat-7(wa36); fat-5(tm420) CON	BX160 fat-7(wa36); fat-5(tm420) PDstv	BX156 fat-6(tm331); fat-7(wa36) CON	BX156 fat-6(tm331); fat-7(wa36) PDstv
290	265	231	174	254	184	238	175	44	0	208	260	182	284	14	31
294	47	291	199	299	147	223	274	34	0	230	242	222	221	16	12
156	222	314	223	249	120	231	52	50	27	249	295	293	251	11	2
261	269	243	170	254	155	251	35	75	1	208	292	263	223	9	25
348	250	214	235	223	105	241	184	29	0	263	186	236	222	34	66
299	282	235	218	244	123	215	135	9	0	236	266	262	237	21	16
299	345	210	227	207	98	156	223	119	0	279	323	280	243	11	26
324	187	249	241	243	203	234	202	54	6	218	253	194	178	12	14
285	200	278	166	284	190	192	138	102	10	282	233	291	231	10	11
256	180	227	185	264	165	241	163	15	19	257	259	105	198	23	14
273	174	228	279	240	159	242	210	56	149	223	296	174	149	21	11
339	173	225	262	302	116	235	166	89	3	277	303	218	187	6	16
348	281	247	243	297	177	265	150	46	15	319	243	274	127	34	28
345	257	275	218	310	190	263	150	50	20	287	185	203	229	24	8
374	262	238	319	311	136	268	194	46	0	339	254	199	165	31	19
278	256	269	228	226	144	170	90	106	15	288	274	242	147	31	31
300	367	248	267	284	199	259	141	81	53	263	291	237	164	13	37
358	309	240	245	265	77	260	173	83	20	272	199	256	240	31	30
359	200	238	221	325	171	269	173	90	3	267	269	252	263	27	38
330	195	264	244	344	144	51	274	0	6	352	208	185	208	20	36
148	326	208	262	80	100	283	58	18	27	241	292	259	210	77	34
346	254	289	161	270	94	222	103	61	11	262	249	274	235	41	16
329	160	291	193	283	177	265	186	11	17	303	227	213	154	33	60
362	259	250	239	219	110	234	6	17	51	254	266	246	198	37	12
341	180	235	275	275	93	200	177	14	56	208	288	225	257	4	38
342	276	275	201	261	110	260	165	57	0	243	288	264	82	24	48
314	330	266	265	307	90	228	175	9	42	229	270	133	181	12	19
329	213	207	200	274	108	267	119	54	3	278	239	203	241	45	33
332	142	256	279	134	85	248	71		1	275	292	237	200	46	30
342	181	224	218	303	140	215	225		0	244	301	259	204	33	28
279	209
307	137
311	261
324	157
279	200
257	180
337	154
369	103
327	277
277	176
136	213
291	334
351	227
205	270
319	148
267	273
327	268
376	3
106	201
366	222
273	330
303	192
276	130
312	188
262	169
75	270
316	29
286	122
243	262
263	292
248	239
296	211
295	258
272	232
294	290
286	189
257	292
273	234
275	290
307	249
375	302
345	210
356	241
350	224
376	292
353	269
307	257
291	274
372

## Sheet: Statistical analysis
Statistical analysis
Šídák's multiple comparisons test	Mean Diff.	95.00% CI of diff.	Below threshold?	Summary	Adjusted P Value
N2 CON vs. N2 PDStv	73.82	53.02 to 94.61	Yes	****	<0.0001
fat-6(tm331) CON vs. fat-6(tm331) PDStv	20.27	-13.37 to 53.90	No	ns	0.5683
fat-5(tm420) CON vs. fat-5(tm420) PDStv	124	90.40 to 157.7	Yes	****	<0.0001
fat-7(wa36) CON vs. fat-7(wa36) PDstv	77.97	44.33 to 111.6	Yes	****	<0.0001
fat-2(wa17) CON vs. fat-2(wa17) PDStv	32.66	-1.001 to 66.31	No	ns	0.0633
fat-6(tm331); fat-5(tm420) CON vs. fat-6(tm331); fat-5(tm420) PDStv	0.3667	-33.27 to 34.00	No	ns	>0.9999
fat-7(wa36) fat-5(tm420) CON vs. fat-7(wa36) fat-5(tm420) PDStv	25.07	-8.572 to 58.70	No	ns	0.2896
fat-6(tm331); fat-7(wa36) CON vs. fat-6(tm331); fat-7(wa36) PDStv	-1.116	-34.21 to 31.98	No	ns	>0.9999
N2 CON vs. fat-6(tm331) CON	50.52	23.04 to 78.00	Yes	****	<0.0001
N2 CON vs. fat-5(tm420) CON	38.32	10.84 to 65.80	Yes	**	0.0013
N2 CON vs. fat-7(wa36) CON	68.49	41.00 to 95.97	Yes	****	<0.0001
N2 CON vs. fat-2(wa17) CON	248.6	220.8 to 276.4	Yes	****	<0.0001
N2 CON vs. fat-6(tm331); fat-5(tm420) CON	37.55	10.07 to 65.04	Yes	**	0.0018
N2 CON vs. fat-7(wa36) fat-5(tm420) CON	69.99	42.50 to 97.47	Yes	****	<0.0001
N2 CON vs. fat-6(tm331); fat-7(wa36) CON	274	246.8 to 301.2	Yes	****	<0.0001
N2 PDStv vs. fat-6(tm331) PDStv	-3.028	-30.56 to 24.50	No	ns	>0.9999
N2 PDStv vs. fat-5(tm420) PDStv	88.54	61.01 to 116.1	Yes	****	<0.0001
N2 PDStv vs. fat-7(wa36) PDstv	72.64	45.11 to 100.2	Yes	****	<0.0001
N2 PDStv vs. fat-2(wa17) PDStv	207.4	180.2 to 234.6	Yes	****	<0.0001
N2 PDStv vs. fat-6(tm331); fat-5(tm420) PDStv	-35.89	-63.43 to -8.363	Yes	**	0.0034
N2 PDStv vs. fat-7(wa36) fat-5(tm420) PDStv	21.24	-6.294 to 48.77	No	ns	0.2389
N2 PDStv vs. fat-6(tm331); fat-7(wa36) PDStv	199.1	171.9 to 226.3	Yes	****	<0.0001
