# Supplementary material for: エンドトキシン吸着療法(PMX) (特集 間質性肺炎治療法の新展開)
Source: eLife journal article supplement (doi:10.7554/elife.61459), 2010-04-01
Supplement: supp [file elife-61459-supp-v1.zip › elife_poa_e61459_Figure_4_figure_supplement_1_source_data_1.xlsx]

## Sheet: Data
Figure 4-figure supplement 1-Source Data 1: Fatty acid composition of N2 CON and PDStv one-day-old adults.
	Percent of total fat			Concentration (µg/mg of worms)
Fatty acid	CON (replicates 1, 2, and 3)	PDstv (replicates 1, 2, and 3)		CON (replicates 1, 2, and 3)	PDstv (replicates 1, 2, and 3)
C16:0 (Palmitic)	6.22	5.68		0.472565	0.334371
	6.64	6.59		0.386823	0.384464
	6.12	6.73		0.383799	0.368468
C18:0 (Stearic)	8.01	7.78		0.608773	0.457645
	8.31	8.81		0.484069	0.513999
	8.28	8.71		0.519525	0.476376
C18:1n9 (Oleic)	27.68	28.22		2.10369	1.66008
	27.43	25.17		1.59844	1.46899
	25.6	25.55		1.6066	1.39768
C18:2n6 (Linoleic (LA))	12.71	11.59		0.965548	0.68199
	12.36	12.09		0.720095	0.705824
	12.95	12.46		0.812843	0.681945
C18:3n6 (γ-Linolenic (GLA))	2.28	2.13		0.17328	0.125313
	2.26	2.47		0.131537	0.143862
	2.14	2.52		0.134046	0.137739
C18:3n3 (α-Linolenic (ALA))	0.81	0.55		0.0612719	0.0325703
	0.81	0.62		0.0470607	0.0361393
	0.86	0.62		0.0538667	0.0336896
C20:3n6 (Dihomo-γ-linolenic (DGLA))	4.42	5.9		0.335832	0.347202
	4.53	5.98		0.264145	0.348813
	4.83	5.72		0.303006	0.313029
C20:4n6 (Arachidonic (AA))	2.16	2.02		0.164301	0.118695
	2.18	2.1		0.126929	0.122491
	2.27	2.14		0.142264	0.117024
C20:5n3 (Eicosapentaenoic (EPA))	23.37	24.56		1.77627	1.44475
	23.38	24.82		1.36211	1.44837
	24.97	24.41		1.56709	1.33543

## Sheet: Statistical analysis
Statistical analysis
	PDStv C16:0 (Palmitic) vs. CON C16:0 (Palmitic)	"PDStv C18:0 (Stearic)" vs. "CON C18:0 (Stearic)"	"PDStv C18:1n9 (Oleic)" vs. "CON C18:1n9 (Oleic)"	"PDStv C18:2n6 (Linoleic (LA))" vs. "CON C18:2n6 (Linoleic (LA))"	"PDStv C18:3n6 (γ-Linolenic (GLA))" vs. "CON C18:3n6 (γ-Linolenic (GLA))"	"PDStv C18:3n3 (α-Linolenic (ALA))" vs. "CON C18:3n3 (α-Linolenic (ALA))"	"PDStv C20:3n6 (Dihomo-g-linolenic (DGLA))" vs. "CON C20:3n6 (Dihomo-g-linolenic (DGLA))"	"PDStv C20:4n6 (Arachidonic (AA))" vs. "CON C20:4n6 (Arachidonic (AA))"	"PDStv C20:5n3 (Eicosapentaenoic (EPA))" vs. "CON C20:5n3 (Eicosapentaenoic (EPA))"
Unpaired t test
P value	0.9863	0.532	0.6384	0.1089	0.3226	0.0013	0.0009	0.0754	0.2742
P value summary	ns	ns	ns	ns	ns	**	***	ns	ns
Significantly different (P < 0.05)?	No	No	No	No	No	Yes	Yes	No	No
One- or two-tailed P value?	Two-tailed	Two-tailed	Two-tailed	Two-tailed	Two-tailed	Two-tailed	Two-tailed	Two-tailed	Two-tailed
t, df	t=0.01823, df=4	t=0.6832, df=4	t=0.5076, df=4	t=2.056, df=4	t=1.127, df=4	t=8.021, df=4	t=8.803, df=4	t=2.387, df=4	t=1.266, df=4
