# Supplementary material for: エンドトキシン吸着療法(PMX) (特集 間質性肺炎治療法の新展開)
Source: eLife journal article supplement (doi:10.7554/elife.61459), 2010-04-01
Supplement: supp [file elife-61459-supp-v1.zip › elife_poa_e61459_Figure_4_source_data_1.xlsx]

## Sheet: Data
Figure 4-Source Data 1: Brood size of wild-type N2 PDStv and mutant PDStv with or without oleic acid (OA) supplementation.
PDstv
Strain	Mean brood size	Maximum brood size	Minimum brood size	Standard Error of Mean	Number of biological replicates	Total sample size
N2	188	337	57	5.018	10	97
STE68 nhr-49(nr2041)	109.6	189	45	6.644	3	30
SH343 nhr-49(gk405)	228.6	303	109	6.806	3	30
SH302 nhr-49(nr2041); nhr-80(tm1011)	156.6	232	91	5.925	3	30
BX110 fat-6(tm331); fat-5(tm420)	149.8	242	20	8.614	5	40
BX160 fat-7(wa36); fat-5(tm420)	207.3	289	141	6.582	4	34
BX156 fat-6(tm331); fat-7(wa36)	0.4857	3	0	0.1607	3	35
PDstv + OA
Strain	Mean brood size	Maximum brood size	Minimum brood size	Standard Error of Mean	Number of biological replicates	Total sample size
N2	249.3	372	96	6.037	10	93
STE68 nhr-49(nr2041)	201.9	248	108	5.757	3	30
SH343 nhr-49(gk405)	271.1	355	165	8.741	3	30
SH302 nhr-49(nr2041); nhr-80(tm1011)	195.6	275	57	8.617	3	30
BX110 fat-6(tm331); fat-5(tm420)	183.2	339	133	6.19	5	46
BX160 fat-7(wa36); fat-5(tm420)	191.5	285	78	7.931	4	37
BX156 fat-6(tm331); fat-7(wa36)	18.92	80	0	3.669	3	37
Brood size
N2 PDstv	N2 PDstv + OA	STE68 nhr-49(nr2041) PDstv	STE68 nhr-49(nr2041) PDstv + OA	SH343 nhr-49(gk405) PDstv	SH343 nhr-49(gk405) PDstv + OA	SH302 nhr-49(nr2041); nhr-80(tm1011) PDstv	SH302 nhr-49(nr2041); nhr-80(tm1011) PDstv + OA	BX110 fat-6(tm331); fat-5(tm420) PDstv	BX110 fat-6(tm331); fat-5(tm420) PDstv + OA	BX160 fat-7(wa36); fat-5(tm420) PDstv	BX160 fat-7(wa36); fat-5(tm420) PDstv + OA	BX156 fat-6(tm331); fat-7(wa36) PDstv	BX156 fat-6(tm331); fat-7(wa36) PDstv + OA
200	319	67	200	303	303	131	213	242	190	234	240	3	0
200	278	166	191	247	165	189	197	110	167	201	200	3	12
57	328	189	240	200	266	167	195	165	224	171	279	1	0
156	223	103	229	210	289	101	275	148	229	250	230	3	34
223	237	172	199	249	249	136	248	166	339	230	258	0	14
180	96	102	248	208	281	111	213	154	141	244	219	0	15
200	267	133	170	233	228	168	214	176	151	226	153	2	35
145	289	45	164	210	259	170	199	209	207	272	180	0	19
144	259	81	231	288	178	193	227	60	210	212	190	0	2
264	216	92	165	184	259	153	204	130	195	204	226	0	4
128	289	142	185	234	169	156	218	215	151	141	156	0	16
200	369	81	170	230	231	232	193	84	148	233	138	0	10
121	293	148	108	222	317	188	196	97	183	260	223	0	1
220	168	113	178	257	287	174	180	164	184	254	285	0	4
90	277	118	220	109	320	162	198	225	142	289	235	0	15
164	260	80	236	207	339	140	147	163	214	163	196	0	0
178	342	47	248	240	295	175	133	116	170	205	166	0	1
287	317	57	229	204	278	177	155	220	145	188	238	0	0
254	291	132	179	247	355	157	57	230	152	223	194	0	0
122	211	120	224	266	302	112	245	185	209	150	220	0	0
159	251	150	229	223	275	132	90	119	154	215	158	0	52
208	240	121	233	218	258	155	206	100	244	248	192	0	9
148	336	87	189	271	279	91	218	155	192	166	224	0	36
192	315	128	181	279	314	116	229	107	239	163	191	0	61
182	268	100	209	235	202	202	242	144	201	246	146	0	1
210	315	82	216	203	307	130	179	20	143	183	209	1	31
174	372	127	171	179	247	145	147	126	219	209	194	2	32
212	276	117	196	255	330	195	261	222	144	146	144	0	0
208	254	120	205	220	285	162	220	161	133	163	90	0	61
144	252	68	213	228	265	179	170	99	177	178	97	1	9
238	219							190	146	173	217	0	40
146	224							212	253	214	131	0	20
192	166							41	168	209	196	0	4
206	260							165	192	186	78	0	72
189	303							186	253		182	1	80
142	192							163	195		183		3
203	214							66	137		229		7
184	264							172	137
161	284							187	133
173	323							97	182
162	358								171
118	208								218
195	269								197
172	258								161
195	357								144
169	341								144
136	276
136	245
178	312
277	226
253	305
272	272
248	323
270	284
324	198
194	333
217	144
212	152
135	182
131	210
141	170
156	206
120	223
118	210
153	209
126	212
139	230
166	263
169	223
155	192
229	244
176	242
214	236
192	214
224	121
225	266
191	168
162	213
211	205
189	232
135	237
337	256
196	249
164	110
191	270
265	307
248	166
266	176
194	236
196	226
185	309
227	191
196	261
128
232
272
154

## Sheet: Statistical analysis
Statistical analysis
Tukey's multiple comparisons test	Mean Diff.	95.00% CI of diff.	Below threshold?	Summary	Adjusted P Value
N2 PDstv vs. N2 PDstv + OA	-61.24	-83.01 to -39.46	Yes	****	<0.0001
N2 PDstv vs. nhr-49(nr2041) PDstv	78.44	47.10 to 109.8	Yes	****	<0.0001
N2 PDstv vs. nhr-49(gk405) PDstv	-40.59	-71.94 to -9.249	Yes	**	0.0013
N2 PDstv vs. nhr-49(nr2041); nhr-80(tm1011) PDstv	31.41	0.06445 to 62.75	Yes	*	0.0489
N2 PDstv vs. fat-5(tm420); fat-6(tm331) PDstv	38.27	10.07 to 66.46	Yes	***	0.0005
N2 PDstv vs. fat-5(tm420); fat-7(wa36) PDstv	-19.28	-49.18 to 10.62	No	ns	0.6503
N2 PDstv vs. fat-6(tm331); fat-7(wa36) PDstv	187.6	158.0 to 217.1	Yes	****	<0.0001
N2 PDstv + OA vs. nhr-49(nr2041) PDstv + OA	47.41	15.91 to 78.92	Yes	****	<0.0001
N2 PDstv + OA vs. nhr-49(gk405) PDstv + OA	-21.79	-53.29 to 9.715	No	ns	0.5338
N2 PDstv + OA vs. nhr-49(gk405); nhr-80(tm1011) PDstv + OA	53.65	22.14 to 85.15	Yes	****	<0.0001
N2 PDstv + OA vs. fat-5(tm420); fat-6(tm331) PDstv + OA	66.06	39.02 to 93.11	Yes	****	<0.0001
N2 PDstv + OA vs. fat-5(tm420); fat-7(wa36) PDstv + OA	57.74	28.58 to 86.90	Yes	****	<0.0001
N2 PDstv + OA vs. fat-6(tm331); fat-7(wa36) PDstv + OA	230.4	201.2 to 259.5	Yes	****	<0.0001
nhr-49(nr2041) PDstv vs. nhr-49(nr2041) PDstv + OA	-92.27	-131.0 to -53.53	Yes	****	<0.0001
nhr-49(gk405) PDstv vs. nhr-49(gk405) PDstv + OA	-42.43	-81.17 to -3.695	Yes	*	0.0173
nhr-49(nr2041); nhr-80(tm1011) PDstv vs. nhr-49(gk405); nhr-80(tm1011) PDstv + OA	-39	-77.74 to -0.2612	Yes	*	0.0466
fat-5(tm420); fat-6(tm331) PDstv vs. fat-5(tm420); fat-6(tm331) PDstv + OA	-33.44	-65.88 to -1.006	Yes	*	0.036
fat-5(tm420); fat-7(wa36) PDstv vs. fat-5(tm420); fat-7(wa36) PDstv + OA	15.78	-19.86 to 51.43	No	ns	0.9689
fat-6(tm331); fat-7(wa36) PDstv vs. fat-6(tm331); fat-7(wa36) PDstv + OA	-18.43	-53.81 to 16.94	No	ns	0.8949
