# Supplementary material for: エンドトキシン吸着療法(PMX) (特集 間質性肺炎治療法の新展開)
Source: eLife journal article supplement (doi:10.7554/elife.61459), 2010-04-01
Supplement: supp [file elife-61459-supp-v1.zip › elife_poa_e61459_Figure_4_source_data_2.xlsx]

## Sheet: Data
Figure 4-Source Data 2: Oil Red O (ORO) intensity in CON and PDStv one-day-old adults.
ORO Intensity (A.U.)
N2 CON	N2 PDstv	AA82 daf-12(rh284) CON	AA82 daf-12(rh284) PDstv	AA85 daf-12(rh285) CON	AA85 daf-12(rh285) PDstv	CF2167 tcer-1(tm1452) CON	CF2167 tcer-1(tm1452) PDstv
37.098	25.769	33.318	39.366	47.346	41.184	64.846	7.952
33.091	28.623	15.133	25.813	8.76	16.1	58.936	-4.027
47.316	31.171	18.432	65.548	43.462	13.628	44.361	19.612
55.435	4.254	41.779	35.161	64.158	8.297	55.712	6.811
47.173	46.875	4.774	39.825	32.916	46.211	15.296	-9.589
64.725	28.867	22.851	38.183	60.888	69.36	-4.683	6.225
54.282	11.793	8.594	52.719	63.279	26.289	55.272	11.127
63.746	40.292	36.74	40.491	30.152	7.032	17.387	-4.147
71.474	16.824	31.289	52	6.357	69.758	-3.267	-5.629
39.089	18.541	10.792	53.223	0.099	3.114	92.244	-0.294
64.261	53.354	54.11	32.571	35.761	30.602	0.84	11.172
56.796	40.38	-5.162	80.638	5.875	47.032	41.697	-7.317
54.469	9.003	28.564	61.012	8.597	33.529	25.995	33.18
63.255	15.512	10.729	64.862	42.349	75.185	-3.15	-4.298
64.587	1.547	1.797	20.715	85.64	-10.925	30.068	-7.134
52.642	14.467	55.104	28.753	18.001	4.463	24.113	-8.633
57.63	51.107	-4.049	43.364	31.981	61.337	73.494	-7.18
45.129	47.027	8.837	3.34	26.617	23.94	-1.722	33.369
45.16	32.329	10.179	44.5	64.867	12.861	-3.441	2.295
76.178	9.76	16.636	-9.736	28.336	64.955	-3.394	1.597
54.127	48.664	-2.902	35.973	9.41	70.611	-3.221	38.668
51.738	11.493	27.9	25.077	16.582	0.222	60.051	12.759
48.521	32.936	-3.545	34.133	-0.345	47.096	-1.958	-6.18
46.951	-2.156	14.796	55.852	-0.303	21.878	-4.304	18.738
54.003	56.436	6.66	47.134	17.814	93.062	26.2988	-7.303
66.073	11.581	12.266	40.423	44.601	18.221	9.781	5.088
59.466	10.852	23.523	45.29	11.015	62.859	4.072	15.045
51.116	42.806	27.41	-0.802	24.864	46.883	15.806	13.937
53.233	25.016	-0.88	48.127	-0.175	64.376	25.286	45.225
49.024	25.664	42.482	28.52	24.82	30.333	69.67	-5.124
75.07	13.107	1.154	54.698	54.149	51.03	95.311	8.684
37.886	45.025	7.016	39.5733	25.513	77.028	6.201	6.322
66.961	34.817	-8.213	12.327	-0.617	104.083	89.153	16.475
50.982	17.024	7.986	78.178	3.145	99.697	80.936	-1.641
72.315	4.441	32.804	22.968	63.669	62.783	43.825	42.379
56.733	48.093	5.652	16.919	45.106	71.636	83.063	35.919
53.359	5.294	14.609	23.097	24.013	42.396	29.355	1.977
45.504	11.787	1.889	12.19	67.437	15.506	22.742	6.431
50.92	6.163	39.917	31.5	21.031	38.194	10.331	6.411
54.8082	28.068	25.869	51.701	24.997	21.253	77.667	-4.683
49.862	12.765	7.006	71.66	71.927	39.121	99.716	10.341
33.989	19.954	7.256	32.958	30.01	93.991	6.934	5.297
66.686	26.195	-2.906	69.553	46.933	81.747	55.76	-3.614
45.65	9.896	16.238	26.81	44.472	24.822	71.398	-2.965
42.007	9.363	-0.632	8.756	61.198	61.704	110.019	-3.849
67.53	39.752	1.284	66.16	19.21	58.675	94.785	-3.379
76.044	48.431	-1.425	29.288	31.6504	17.743	50.424	-2.696
67.644	15.185	0.048	2.688	22.396	47.448	60.729	-0.265
68.079	41.597	1.737	67.55	-2.041	49.651	34.099	18.17
70.139	37.653	3.558	69.799	2.528	80.254	14.512	-6.831
32.589	22.659	1.935	-3.186	59.004	30.983	7.364	-6.582
67.272	25.256	-3.929	9.054	66.838	88.316	27.187	6.42835
72.122	44.466	-6.558	-3.648	43.708	76.253	21.408	2.747
47.225	68.027	1.452	63.009	19.525	45.9209	89.11	16.243
71.468	54.739	7.68	49.365	-0.077	65.729	2.331	15.727
73.196	65.16	0.803	48.137	23.695	58.588	10.83	46.762
57.253	30.093	12.6855	52.093	8.177	3.914	55.87	-13.157
64.236	63.805	8.872	58.852	12.625	37.741	60.444	8.864
49.892	90.722	16.721	3.929	-0.501	42.883	56.686	42.614
56.155	72.941	-2.71	6.641	42.224	-1.36	58.352	-9.2
67.338	59.756	16.164	6.409	38.271	2.988	59.909	40.581
61.731	59.74	4.25	52.022	32.581	25.097	66.303	53.193
63.772	58.92	22.693	19.648	44.124	3.142	70.655	20.715
71.329	10.912	3.443	-2.82	9.276	30.962	84.814	-3.716
66.16	69.969	9.467	21.474	44.987	70.491	74.565	37.483
50.566	73.746	-3.978	20.197	5.207	4.53	50.1851	-1.974
79.477	42.396	43.318	7.666	-3.198	2.05	29.594	25.571
47.771	53.318	2.061	10.259	20.321	52.578	65.351	13.317
31.866	70.74	24.986	-2.124	0.167	4.311	39.598	68.046
45.455	79.454	-2.813	62.02	63.365	16.246	33.662	48.913
21.328	81.677	34.504	30.871	0.336	55.634	19.68	38.304
78.631	36.505	7.363	62.463	3.851	52.537	-0.034	22.361
71.758	8.182	2.324	16.986	27.419	64.242	48.582	15.006
75.322	77.408	9.139	64.437	19.383	-12.327	47.041	16.7
70.158	32.882	20.78	44.251	33.553	18.357	61.889	20.545
38.646	78.27	16.325	28.771	30.591	45.48	5.377	16.025
55.423	31.577	11.843	30.301	0.147	33.851	60.289	27.766
45.321	87.86	-0.184	-10.736	3.869	3.002	67.679	16.387
48.616	90.693	26.641	3.868	47.945	41.244	8.823	10.848
60.992	75.822	5.301	33.475	15.874	6.5	65.158	45.814
99.653	69.044	18.785	12.807	42.222	58.697	6.323	14.671
47.783	90.697	17.836	3.502	47.276	17.755	90.908	49.573
65.729	70.566	10.757	80.194	72.07	-6.985	66.185	49.64
70.309	60.287	23.671	37.162	7.261	-9.377	87.409	20.988
76.734	54.628	-2.181	34.786	7.958	55.004	2.128	36.471
43.528	70.842	-2.545	87.236	-3.013	42.659	2.681	24.061
56.234	92.679	32.102	12.236	0.144	78.869	13.185	11.109
41.583	60.603	23.585	41.829	-1.473	23.628	42.148	18.422
59.0052	62.641	12.8555	53.848	1.269	47.15	54.191	13.257
57	83.894	6.714	7.781	21.6639	35.752	5.441	13.72
87.507	71.751	-1.56	76.286	-0.283	42.32	8.48	23.5368
76.361	84.447	4.294	67.726	-1.606	89.441	27.058	83.437
77.44	85.482	-0.926	22.637	-0.341	83.778	42.621	32.806
49.132	52.268	14.217	34.391	1.384	1.122	2.677	-5.803
73.705	76.43	2.099	2.728	46.919	102.41	53.896	28.998
78.638	85.317	4.294	32.986	-1.319	51.705	43.708	-7.018
52.453	90.894	-1.352	86.491	18.103	40.525	81.913	0.586
72.972	54.566	0.745	76.197	12.035	-8.335	72.497	7.428
75.004	41.066	-0.973	39.08	-1.516	32.409	78.327	-0.792
72.262	18.329	9.424	-1.098	37.35	88.164	13.494	-7.881
20.862	11.647	5.183	0.166	58.862	73.826	87.092	-8.715
82.291	62.4053	-0.146	38.295	19.47	35.5091	27.048	-3.925
104.372	48.716	13.856	11.032	67.124	40.902	12.616	-0.695
55.149	43.263	43.8	62.95	59.83	8.265	34.742	-1.154
74.78	67.358	54.437	13.68	4.644	69.175	39.7226	47.905
61.636	40.577	43.091	36.51	25.954	29.176		-3.128
64.959	32.155	9.863	2.208	3.344	37.29		-7.186
79.085	29.992	41.536	60.31	57.008	33.74		-6.876
62.43	29.95	7.134	71.802	12.857	-6.478		50.84
86.575	41.253	3.329	34.779	15.353	23.231		15.779
78.69	25.159	6.976	36.2655	0.714	70.74		-10.658
40.5	10.538	28.069		2.047	-10.707		16.295
86.668	20.296	34.799		13.788	52.236		20
42.345	52.31	25.363		39.994	66.663		21.37
90.215	19.507	-5.249		5.669	69.26		5.881
69.3473	26.067	3.172		10.327	58.211		20.366
	40.502	-7.879		47.949	42.683		6.723
	37.681	-4.613		15.9	66.685		24.626
	29.29	-2.394		13.104	2.137		1.477
	15.94	1.397		23.671	19.975		61.881
	10.403	1.451		-1.006	23.888		10.39
	42.433	-1.435		52.434	38.123		33.262
	33.115	10.749		5.365	64.289		19.931
	51.934	15.341		38.251	-1.955		-4.525
	24.936	0.853		32.852	30.068		-0.146
	22.424	35.704		22.681	67.919		12.9847
	24.091	46.571		1.9	45.409
	12.737	22.375		8.175	72.228
	22.491	3.918		-7.225	84.549
	3.663	0.449		2.253	35.552
	19.961	-3.999		-3.573	12.634
	13.748	-1.108		9.574	73.108
	23.947	-5.215		28.018	42.012
	47.691	10.5535		15.326	40.673
	17.641			44.525	32.806
	8.497			27.913	51.641
	41.611			10.856	-3.165
	43.198			21.065	0.868
	49.324			-1.547	53.353
	22.015			18.6974	56.032
	35.44				62.089
	28.8				75.28
	28.826				30.95
	42.431				24.608
	25.721				21.913
	16.515				51.707
	29.818				39.9946
	15.495
	24.591
	20.095
	43.253
	41.947
	7.41
	41.698
	29.996
	27.692
	22.46
	29.247
	29.6044

## Sheet: Statistical analysis
Statistical analysis
Šídák's multiple comparisons test	Mean Diff.	95.00% CI of diff.	Below threshold?	Summary	Adjusted P Value
N2 CON vs. N2 PDStv	21.45	14.32 to 28.58	Yes	****	<0.0001
AA82 daf-12(rh284) CON vs. AA82 daf-12(rh284) PDStv	-23.31	-30.81 to -15.80	Yes	****	<0.0001
AA85 daf-12(rh285) CON vs. AA85 daf-12(rh285) PDStv	-16.76	-23.65 to -9.866	Yes	****	<0.0001
CF2167 tcer-1(tm1452) CON vs. CF2167 tcer-1(tm1452) PDStv	27.14	19.41 to 34.87	Yes	****	<0.0001
N2 CON vs. AA82 daf-12(rh284) CON	47.93	40.82 to 55.03	Yes	****	<0.0001
N2 CON vs. AA85 daf-12(rh285) CON	35.98	28.95 to 43.01	Yes	****	<0.0001
N2 CON vs. CF2167 tcer-1(tm1452) CON	19.27	11.71 to 26.83	Yes	****	<0.0001
N2 PDStv vs. AA82 daf-12(rh284) PDStv	3.169	-3.758 to 10.10	No	ns	0.6176
N2 PDStv vs. AA85 daf-12(rh285) PDStv	-2.226	-8.621 to 4.168	No	ns	0.7896
N2 PDStv vs. CF2167 tcer-1(tm1452) PDStv	24.96	18.29 to 31.63	Yes	****	<0.0001
