# Supplementary material for: エンドトキシン吸着療法(PMX) (特集 間質性肺炎治療法の新展開)
Source: eLife journal article supplement (doi:10.7554/elife.61459), 2010-04-01
Supplement: supp [file elife-61459-supp-v1.zip › elife_poa_e61459_Figure_4_source_data_3.xlsx]

## Sheet: Data
Figure 4--Source Data 3: ORO intensity of embryos measured in utero in one-day-adults.
Embryo ORO Intensity (A.U.)
N2 CON	N2 PDstv	AA82 daf-12(rh284) CON	AA82 daf-12(rh284) PDstv	AA85 daf-12(rh285) CON	AA85 daf-12(rh285) PDstv
85.213	100.444	135.011	179.542	190.034	193.251
97.994	112.123	174.999	181.365	194.735	194.651
95.687	116.188	171.03	185.862	159.792	196.976
95.186	92.483	180.068	182.379	156.189	201.438
89.611	98.802	182.649	177.575	159.789	199.078
89.165	93.301	165.039	179.827	179.051	199.698
106.821	71.968	174.444	189.553	184.06	173.601
109.858	93.274	166.602	173.464	185.582	178.066
94.462	100.562	184.326	175.301	213.884	178.556
107.915	112.328	168.073	174.851	171.509	182.483
96.673	109.758	178.043	189.165	179.952	146.207
83.866	112.977	158.965	182.459	176.278	164.524
95.755	106.002	175.226	182.586	176.303	153.586
96.041	122.208	156.675	187.572	173.922	164.907
108.674	100.195	156.743	188.424	192.55	162.153
94.14	113.435	160.197	190.993	192.22	155.25
81.882	104.032	192.219	198.7	199.152	164.701
85.104	109.139	159.859	162.315	201.115	172.424
114.479	98.322	161.367	163.292	168.739	189.648
118.981	113.578	174.144	152.826	138.406	191.443
132.736	127.009	169.533	162.48	149.053	189.275
101.46	128.466	169.613	159.29	135.914	184.975
104.154	117.224	162.319	157.769	182.288	177.333
125.914	95.224	165.773	135.033	176.843	187.727
104.359	114.625	165.751	141.559	131.717	176.435
105.597	110.719	168.724	156.242	121.01	171.955
113.684	117.488	174.893	149.187	120.995	175.122
97.219	119.81	165.672	147.624	168.092	179.296
97.953	120.203	155.594	166.972	174.667	180.63
109.572	111.566	161.338	160.379	190.118	162.938
105.75	103.191	140.516	171.025	182.928	192.63
114.751	106.857	152.451	170.792	193.896	196.029
99.974	120.47	162.726	153.6	172.301	165.46
91.27	107.881	162.245	151.337	170.032	199.994
103.051	138.931	173.537	168.706	170.586	194.404
125.966	127.433	163.039	179.57	187.959	180.669
125.429	122.571	170.262	172.193	171.785
115.48	116.503	159.732	155.86	173.504
99.574	105	179.602	145.269
80.212	107.73	168.906	154.095
87.09	102.87	173.968	160.507
109.818	110.323	157.899	164.704
106.772	110.799	175.023	160.01
	125.235	163.956	167.63
	97.527	158.155	166.103
	93.267	173.235	164.726
	96.174	181.245	175.303
	100.21	169.281	168.614
	98.45	176.484	160.931
	120.519	180.039	169.725
	100.651	179.308	153.33
	119.888	178.349	157.274
	116.912		179.547
	117.813		178.664
	105.986		183.759
	123.104		190.05
	111.764		173.088
	112.848		188.781
	107.603		185.542
	103.923		186.64
	105.561		185.207
	106.21		186.092
	122.717		196.715
	113.122		183.276
	122.621		183.117
	113.39		173.993
	111.813		140.959
	105.127		152.619
	112.536
	116.024
	114.811
	104.921
	98.064

## Sheet: Statistical analysis
Statistical analysis
Šídák's multiple comparisons test	Mean Diff.	95.00% CI of diff.	Below threshold?	Summary	Adjusted P Value
N2 CON vs. N2 PDStv	-7.453	-13.94 to -0.9654	Yes	*	0.0184
daf­12(rh284) CON vs. daf-12(rh284) PDStv	-2.521	-8.738 to 3.696	No	ns	0.7006
daf-12(rh285) CON vs. daf-12(rh285) PDStv	-7.116	-14.97 to 0.7325	No	ns	0.0881
N2 CON vs. daf­12(rh284) CON	-65.53	-72.04 to -59.02	Yes	****	<0.0001
N2 CON vs. daf-12(rh285) CON	-70.37	-77.40 to -63.33	Yes	****	<0.0001
N2 PDStv vs. daf-12(rh284) PDStv	-60.6	-65.92 to -55.27	Yes	****	<0.0001
N2 PDStv vs. daf-12(rh285) PDStv	-70.03	-76.46 to -63.60	Yes	****	<0.0001
