# Supplementary material for: エンドトキシン吸着療法(PMX) (特集 間質性肺炎治療法の新展開)
Source: eLife journal article supplement (doi:10.7554/elife.61459), 2010-04-01
Supplement: supp [file elife-61459-supp-v1.zip › elife_poa_e61459_Figure_5_figure_supplement_1_source_data_1.xlsx]

## Sheet: Data
Figure 5-figure supplement 1-Source Data 1: mRNA level of vit-1, vit-2, vit-3/4/5, and vit-6 in one-day-old N2 CON and PDStv adults following RNAi-by-feeding with vit-1 or control empty RNAi vector
Empty vector RNAi Ct values								vit-1 RNAi Ct values
	Trial #1		Trial #2		Trial #3			Trial #1		Trial #2		Trial #3
Target	CON	PDstv	CON	PDstv	CON	PDstv		CON	PDstv	CON	PDstv	CON	PDstv
vit-1	14.62	14.55	14.8	14.83	15.13	15.16		24.79	19.13	25.06	21.12	24.76	19.25
vit-1	14.64	14.57	14.84	15.07	15.14	15.22		24.71	19.15	24.69	21.15	24.79	19.26
vit-1	14.46	14.41	14.61	14.72	15.07	15.11		24.56	19.13	24.55	21.02	24.61	19.21
vit-2	15.18	15.36	15.29	15.71	15.92	16		25.03	20.17	25.15	22.28	25.3	20.15
vit-2	15.13	15.26	15.28	15.7	15.92	15.87		24.79	20.14	24.96	22.17	25.11	20.1
vit-2	15.2	15.4	15.34	15.78	15.93	16.03		24.99	20.2	25.08	22.22	25.24	20.2
vit-3/4/5	16.13	16	16.18	16.35	16.7	16.35		19.7	18.37	19.55	20.13	19.63	18.47
vit-3/4/5	16.25	16.11	16.25	16.47	16.78	16.55		19.85	18.35	19.75	20.08	19.79	18.42
vit-3/4/5	16.18	16.08	16.11	16.47	16.77	16.44		19.82	18.27	19.71	20.1	19.85	18.37
vit-6	15.11	15.22	16.15	15.5	15.51	15.78		15.54	16.02	15.5	17.43	15.56	16.04
vit-6	15.07	15.19	16.18	15.49	15.46	15.67		15.55	15.96	15.42	17.33	15.48	15.97
vit-6	15.22	15.23	16.66	15.54	15.67	15.83		15.67	16.09	15.66	17.46	15.7	16.06
act-1-5	17.79	17.44	17.82	17.84	18.28	17.96		17.71	17.68	17.83	19.11	17.58	17.87
act-1-5	17.58	17.27	17.77	17.62	18.16	17.61		17.46	17.45	17.61	18.83	17.41	17.55
act-1-5	17.57	17.35	17.74	17.61	18.12	17.74		17.41	17.52	17.64	19.06	17.47	17.69

## Sheet: Statistical analysis
Statistical analysis
Source of Variation	% of total variation	P value	P value summary	Significant?
Condition x Gene	12.35	<0.0001	****	Yes
Condition	17.82	<0.0001	****	Yes
Gene	69.13	<0.0001	****	Yes
Subject	0.2518	0.7852	ns	No
Šídák's multiple comparisons test	Mean Diff.	95.00% CI of diff.	Below threshold?	Summary	Adjusted P Value
CONStv - PDStv
vit-1	-5.718	-6.806 to -4.630	Yes	****	<0.0001
vit-2	-5.219	-6.307 to -4.131	Yes	****	<0.0001
vit-3/4/5	-1.51	-2.598 to -0.4219	Yes	**	0.0087
vit-6	0.3144	-0.7736 to 1.403	No	ns	0.8552
