# Supplementary material for: エンドトキシン吸着療法(PMX) (特集 間質性肺炎治療法の新展開)
Source: eLife journal article supplement (doi:10.7554/elife.61459), 2010-04-01
Supplement: supp [file elife-61459-supp-v1.zip › elife_poa_e61459_Figure_5_figure_supplement_2_source_data_1.xlsx]

## Sheet: Data
Figure 5-figure supplement 2-Source Data 1: Altered vitellogenesis does not affect fecundity in postdauer animals.
CON
Strain and condition	Mean brood size	Maximum brood size	Minimum brood size	Standard Error of Mean	Number of biological replicates	Total sample size
N2 Empty vector RNAi	331.3	395	243	7.38	3	30
N2 vit-1 RNAi	277.8	359	208	5.786	3	30
PDstv
Strain and condition	Mean brood size	Maximum brood size	Minimum brood size	Standard Error of Mean	Number of biological replicates	Total sample size
N2 Empty vector RNAi	294.8	410	4	15.15	3	30
N2 vit-1 RNAi	277.6	380	126	10.09	3	30
Brood size
N2 Empty vector RNAi CON	N2 vit-1 RNAi CON	N2 Empty vector RNAi PDstv	N2 vit-1 RNAi PDstv
260	275	294	308
343	306	322	208
267	283	355	247
303	284	312	311
279	257	282	304
292	289	262	272
304	241	337	276
343	266	348	281
395	296	410	334
329	359	320	265
353	257	380	286
319	278	297	277
362	305	239	339
381	264	386	303
393	310	353	294
371	293	227	272
325	229	169	294
290	212	393	268
363	341	346	266
243	285	386	266
340	208	259	153
347	273	275	126
333	301	234	380
366	283	228	223
300	278	199	370
354	266	346	203
338	269	4	270
300	282	349	276
357	264	293	333
389	280	240	322

## Sheet: Statistical analysis
Statistical analysis
Unpaired t test	vit-1 RNAi CON vs. Empty vector RNAi CON	Empty vector RNAi PDStv vs. Empty vector RNAi CON
P value	<0.0001	0.0346
P value summary	****	*
Significantly different (P < 0.05)?	Yes	Yes
One- or two-tailed P value?	Two-tailed	Two-tailed
t, df	t=5.705, df=58	t=2.164, df=58
