# Supplementary material for: エンドトキシン吸着療法(PMX) (特集 間質性肺炎治療法の新展開)
Source: eLife journal article supplement (doi:10.7554/elife.61459), 2010-04-01
Supplement: supp [file elife-61459-supp-v1.zip › elife_poa_e61459_Figure_5_figure_supplement_3_source_data_1.xlsx]

## Sheet: Data
Figure 5-figure supplement 3-Source Data 1: Reproductive plasticity in postdauer animals is not subject to transgenerational inheritance.
CON
Strain	Mean brood size	Maximum brood size	Minimum brood size	Standard Error of Mean	Number of biological replicates	Total sample size
N2 P0	274.6	391	102	5.113	11	134
N2 F1	237.2	355	19	5.544	11	133
N2 F2	232	352	32	5.323	11	134
PDstv
Strain	Mean brood size	Maximum brood size	Minimum brood size	Standard Error of Mean	Number of biological replicates	Total sample size
N2 P0	229.8	384	57	5.513	11	134
N2 F1	229.4	348	27	6.04	11	132
N2 F2	227.5	364	15	5.824	11	134
Brood size
N2 CON P0	N2 PDstv P0	N2 CON F1	N2 PDstv F1	N2 CON F2	N2 PDstv F2
312	222	295	300	311	297
343	185	285	279	178	249
333	79	275	344	292	364
325	348	281	276	330	260
387	172	293	287	297	166
362	144	289	306	299	281
342	272	242	305	264	255
359	271	284	266	170	273
260	315	314	308	278	313
264	173	245	312	279	271
206	291	249	260	281	175
347	324	341	307	338	211
204	178	302	218	221	187
290	244	129	313	351	165
268	199	311	148	244	230
129	192	318	273	289	78
254	156	305	101	139	328
341	266	328	282	280	309
259	232	279	343	329	262
277	239	336	312	307	313
253	253	295	237	248	315
312	115	278	276	102	302
220	283	293	310	235	316
275	278	355	332	167	290
315	250	327	61	308	274
220	322	280	252	263	327
297	304	298	260	285	177
297	384	273	308	149	15
303	219	301	135	293	328
129	187	288	300	295	109
320	190	276	97	290	294
226	262	27	299	275	259
320	311	309	258	235	258
310	271	300	275	253	123
299	291	304	198	235	357
349	248	194	60	275	237
345	191	245	207	270	175
313	252	312	254	256	259
327	266	206	243	243	262
279	320	256	250	245	29
269	350	279	142	291	310
247	254	240	179	177	337
260	200	280	315	319	281
259	249	243	266	249	267
313	306	248	276	260	278
318	244	220	348	244	297
260	186	85	47	113	206
235	195	292	256	194	297
285	209	163	332	328	290
315	258	109	281	160	211
377	189	238	195	238	251
294	201	255	154	255	274
303	85	140	272	263	242
287	186	25	236	281	292
319	196	256	51	274	224
391	116	291	140	210	199
332	270	258	238	188	259
352	316	301	220	234	288
162	57	228	186	183	315
302	226	232	101	197	158
270	241	206	278	200	159
226	270	237	259	224	250
274	319	280	276	195	264
251	236	291	296	227	101
234	200	205	158	266	145
271	303	183	336	288	207
238	255	193	128	184	252
185	170	217	257	186	197
279	291	263	248	161	237
321	314	252	216	233	198
246	305	199	163	223	201
263	210	194	223	101	298
261	259	231	167	210	231
263	208	226	125	218	252
215	118	174	231	243	244
293	247	110	195	148	198
307	239	229	160	246	41
201	209	171	276	221	159
297	275	242	167	218	169
331	205	232	171	236	82
357	266	172	256	140	162
132	345	240	113	179	199
285	241	154	205	231	112
287	173	235	251	238	222
102	100	123	196	255	113
215	142	247	165	212	180
307	245	277	242	278	184
300	140	167	228	218	173
300	245	260	208	250	194
286	243	185	233	245	224
206	270	236	269	32	258
249	247	250	296	253	225
255	273	312	246	251	118
298	176	240	190	205	269
230	315	230	27	159	232
245	256	163	262	143	280
224	215	222	310	287	230
245	281	224	166	301	260
280	326	292	224	91	254
212	192	263	146	228	218
219	256	310	298	149	111
165	177	183	182	251	228
186	191	226	188	210	258
193	266	252	268	259	194
348	315	130	213	293	220
310	207	198	111	197	256
369	278	216	208	277	240
303	226	93	150	149	244
297	291	195	227	71	182
176	252	211	267	237	236
171	260	174	178	222	292
306	268	227	104	274	280
348	294	192	251	284	243
297	274	248	208	155	254
314	246	270	276	219	256
283	243	19	257	57	220
244	185	301	225	188	221
327	276	259	261	198	256
236	153	288	261	234	240
241	133	234	212	294	295
113	213	120	220	291	279
276	235	282	155	224	204
290	158	251	292	99	140
324	181	262	284	306	225
233	120	219	252	289	73
345	134	274	270	352	168
248	138	240	223	249	243
276	81	219	216	247	234
223	218	284	228	165	111
335	200	233	295	268	247
363	169	199	252	150	201
284	133	157	293	253	243
133	290	258		268	181
330	175			232	245

## Sheet: Statistical analysis
Statistical analysis
Dunnett's multiple comparisons test	Mean Diff.	95.00% CI of diff.	Below threshold?	Summary	Adjusted P Value
N2 CON P0 vs. N2 PDStv P0	44.81	25.04 to 64.59	Yes	****	<0.0001
N2 CON P0 vs. N2 CON F1	37.38	17.57 to 57.19	Yes	****	<0.0001
N2 CON P0 vs. N2 PDStv F1	45.26	25.41 to 65.11	Yes	****	<0.0001
N2 CON P0 vs. N2 CON F2	42.58	22.81 to 62.36	Yes	****	<0.0001
N2 CON P0 vs. N2 PDStv F2	47.14	27.37 to 66.92	Yes	****	<0.0001
N2 PDStv P0 vs. N2 CON P0	-44.81	-64.59 to -25.04	Yes	****	<0.0001
N2 PDStv P0 vs. N2 CON F1	-7.435	-27.25 to 12.38	No	ns	0.8102
N2 PDStv P0 vs. N2 PDStv F1	0.4424	-19.41 to 20.29	No	ns	>0.9999
N2 PDStv P0 vs. N2 CON F2	-2.231	-22.01 to 17.54	No	ns	0.9984
N2 PDStv P0 vs. N2 PDStv F2	2.328	-17.45 to 22.10	No	ns	0.9983
