# Supplementary material for: エンドトキシン吸着療法(PMX) (特集 間質性肺炎治療法の新展開)
Source: eLife journal article supplement (doi:10.7554/elife.61459), 2010-04-01
Supplement: supp [file elife-61459-supp-v1.zip › elife_poa_e61459_Figure_5_source_data_1.xlsx]

## Sheet: Data
Figure 5-Source Data 1: ORO staining in N2 CON and PDStv one-day-adults fed with vit-1 RNAi or control empty RNAi vector (EV).
ORO Intensity (A.U.)
Empty RNAi vector CON	Empty RNAi vector PDstv	vit-1 RNAi CON	vit-1 RNAi PDstv
20.827	-4.127	54.307	1.992
8.919	-4.985	35.246	6.092
32.016	-4.06	12.82	9.572
-4.389	1.467	59.81	-6.749
22.48	-2.857	51.898	30.323
23.98	13.22	61.813	-6.148
30.981	-5.327	28.458	-1.771
40.08	-4.395	81.963	33.259
57.26	-5.396	41.107	-3.807
35.92	-3.679	34.716	-5.032
34.05	3.09	32.274	-9.868
62.638	0.59	62.1	0.057
57.006	5.341	45.67	35.759
11.049	10.201	42.365	0.879
41.018	-0.737	72.681	0.862
39.561	-9.625	45.193	18.154
40.786	13.027	47.079	31.76
39.895	15.233	36.125	-3.002
-2.972	-4.654	31.671	-8.897
39.212	-8.063	61.864	-8.213
61.854	-0.592	39.139	9.726
33.603	-4.186	35.981	-2.877
4.308	-4.862	30.751	12.753
41.001	13.743	57.396	14.363
34.851	3.819	46.127	-0.792
46.047	-0.275	3.868	1.451
27.023	-2.354	58.398	-5.111
25.093	0.652	18.505	31.155
52.707	2.338	38.009	4.872
32.894	-8.4	60.048	10.751
33.675	1.255	18.706	1.187
16.324	-3.481	59.069	4.682
-7.578	14.826	39.158	-0.281
31.142	8.197	29.728	9.305
26.454	24.685	33.454	32.738
13.48	-6.12	40.912	2.245
29.801	-8.638	0.628	-0.752
10.41	16.122	51.358	0.444
18.066	-7.188	56.942	41.791
73.765	2.489	-2.199	30.18
30.8809	-2.634	74.904	16.94
41.886	-7.813	51.776	13.75
14.627	-0.442	29.165	32.582
72.792	-2.451	53.843	6.374
42.541	0.748955	-2.546	-9.191
13.713	18.756	63.023	24.562
60.992	16.922	45.696	14.128
11.217	8.737	12.777	-3.176
26.562	-13.184	-1.061	1.54
8.76	33.426	26.243	19.31
27.209	12.918	26.824	7.726
21.675	-6.55	27.559	34.505
38.451	-7.145	-6.726	-9.766
27.646	-6.444	44.764	4.93
12.689	20.896	25.655	8.65307
59.09	5.87	30.42	15.318
28.24	-8.424	38.526	17.547
30.183	-3.695	4.451	8.798
48.795	-9.129	43.779	-5.254
42.748	21.729	42.76	9.422
71.419	-6.263	53.463	26.817
15.796	18.134	0.895	18.168
10.361	-7.342	34.192	11.228
11.425	-4.608	44.355	34.401
47.915	19.662	42.772	16.632
20.847	-6.982	47.071	3.742
35.315	7.419	34.249	28.777
37.54	4.712	28.621	16.904
12.484	-5.527	24.05	16.592
17.968	7.697	38.591	34.858
42.622	-1.786	36.333	40.55
17.964	-2.065	25.584	30.148
34.682	-3.685	57.599	-1.063
49.093	24.524	32.123	11.928
40.12	4.43355	33.731	35.907
37.087	-5.193	5.117	40.523
20.834	-4.668	24.588	-0.09
31.946	-12.235	29.661	28.638
45.907	-1.858	45.475	28.769
51.747	-1.311	34.699	3.772
29.392	1.446	19.335	1.917
40.546	-3.832	29.361	7.951
58.844	-8.658	22.629	-2.724
39.354	23.831	34.105	36.529
42.107	62.074	33.781	35.877
33.9348	14.338	32.377	8.906
27.881	42.284	40.095	15.415
38.681	-11.761	57.185	3.225
31.046	5.592	31.246	2.543
18.796	11.401	44.281	28.346
25.872	-15.115	48.837	-5.972
35.367	4.086	30.901	14.152
47.332	19.749	31.383	27.547
11.584	-3.671	26.02	17.0196
30.648	27.664	23.983	-3.334
22.877	4.354	25.382	31.96
23.023	13.796	34.59	33.027
30.537	-14.478	26.157	-7.668
-2.401	34.419	35.124	23.789
36.635	5.765	27.674	-5.89
35.444	9.239	14.423	30.73
38.248	13.567	18.665	45.514
32.292	8.777	40.114	1.682
36.344	58.026	40.876	3.938
4.434	13.586	48.047	28.112
13.618	28.214	62.365	48.865
34.573	-9.666	55.431	1.285
28.116	-9.682	33.709	47.86
15.579	28.188	44.827	27.823
38.515	27.651	38.924	11.455
58.426	13.271	48.958	1.841
10.822	-9.318	6.814	25.857
36.331	-8.08	65.107	15.637
26.403	9.25768	45.836	-0.488
40.892		37.154	10.97
24.715		34.8251	10.563
2.764		29.842	-3.698
29.196		52.708	6.711
31.25		31.238	19.704
-0.311		37.851	9.647
55.206		15.637	-1.208
5.159		32.188	25.475
14.014		1.417	40.532
8.852		52.97	-1.685
27.405		0.416	17.169
35.16		37.571	16.672
28.215		-4.103	20.786
36.748		39.073	8.852
39.958		-4.15	11.084
19.992		59.87	13.206
43.505		31.506	24.838
49.952		15.437	15.969
45.027		4.132	20.131
13.735		41.655	-8.092
34.493		19.221	5.209
27.197		44.411	-1.987
28.351		53.508	14.8296
28.0098		58.578
		30.57
		74.129
		42.601
		57.813
		58.016
		30.221
		12.605
		38.327
		38.219
		52.229
		37.563
		48.452
		68.535
		46.101
		41.842
		51.084
		26.864
		55.614
		34.064
		27.712
		26.737
		41.614
		30.944
		34.592
		47.044
		27.472
		36.0821

## Sheet: Statistical analysis
Statistical analysis
Šídák's multiple comparisons test	Mean Diff.	95.00% CI of diff.	Below threshold?	Summary	Adjusted P Value
Empty RNAi vector CON vs. Empty RNAi vector PDStv	26.17	21.57 to 30.76	Yes	****	<0.0001
vit-1 RNAi CON vs. vit-1 RNAi PDStv	23.52	19.33 to 27.70	Yes	****	<0.0001
