# Supplementary material for: エンドトキシン吸着療法(PMX) (特集 間質性肺炎治療法の新展開)
Source: eLife journal article supplement (doi:10.7554/elife.61459), 2010-04-01
Supplement: supp [file elife-61459-supp-v1.zip › elife_poa_e61459_Figure_5_source_data_2.xlsx]

## Sheet: Data
Figure 5-Source Data 2: Adult lifespan assay of N2 CON and PDStv P0 and F1 generations.
	Percent survival
Days at 20oC	N2 CON P0	N2 PDStv P0	N2 CON F1	N2 PDStv F1
0	100	100	100	100
2	100	100	100	100
4	100	100	100	100
6	99.9302	100	100	100
8	99.9302	100	100	100
10	99.8404	100	99.8424	99.9222
12	99.2125	99.8162	99.3037	99.4793
14	97.5922	99.3963	98.3698	98.4569
16	96.0861	98.3027	97.8828	97.7399
18	93.4639	97.5904	96.1244	96.3172
20	89.3688	96.2231	94.6817	94.2384
22	82.5935	93.6965	91.2261	91.2055
24	70.4076	89.1585	82.3484	87.5796
26	60.8066	84.9954	74.1136	81.5655
28	45.6049	77.4403	65.6273	66.5403
30	37.3131	65.3192	57.624	57.4666
32	33.1672	53.443	43.218	45.3102
34	11.0557	44.2813	36.015	35.6009
36	11.0557	16.6055	21.0087	30.8541
38	0	0	10.5044	19.2838
40			0	12.8559
42				0
Number of replicates	4	4	4	4
Median survival	28	34	32	32
# deaths/events	156	134	154	151

## Sheet: Statistical analysis
Statistical analysis
Log-rank (Mantel-Cox) test	CON P0 vs. PDstv P0	CON F1 vs. PDstv F1
Chi square	69.84	1.412
df	3	1
P value	<0.0001	0.2348
P value summary	****	ns
Are the survival curves sig different?	Yes	No
