# Supplementary material for: エンドトキシン吸着療法(PMX) (特集 間質性肺炎治療法の新展開)
Source: eLife journal article supplement (doi:10.7554/elife.61459), 2010-04-01
Supplement: supp [file elife-61459-supp-v1.zip › elife_poa_e61459_Figure_5_source_data_3.xlsx]

## Sheet: Data
Figure 5-Source Data 3: Adult lifespan assay of N2 CON and PDStv fed with vit-1 or control empty vector RNAi.
	Percent survival
Days @ 20oC	N2 CON empty vector RNAi	N2 CON vit-1 RNAi	N2 PDStv empty vector RNAi	N2 PDStv vit-1 RNAi
0	1298	1902	1467	1933
2	1298	1902	1467	1933
4	1138	1742	1317	1773
6	978	1582	1167	1613
8	819	1423	1018	1453
10	660	1264	869	1295
12	503	1106	720	1138
14	353	954	574	982
16	231	809	435	832
18	147	673	321	694
20	96	551	229	571
22	61	440	157	460
24	35	335	109	357
26	18	243	77	261
28	6	167	52	181
30	1	107	31	118
32		62	14	70
34		31	6	41
36		16	2	24
38		7		14
40		3		8
42		1		4
44				1
Number of replicates	3	3	3	3
Median survival	22	32	30	34
# deaths/events	156	151	149	156

## Sheet: Statistical analysis
Statistical analysis
Log-rank (Mantel-Cox) test	N2 CON empty vector RNAi vs. N2 CON vit-1 RNAi	N2 PDStv empty vector RNAi vs. N2 PDStv vit-1 RNAi	N2 CON empty vector RNAi vs. N2 PDStv empty vector RNAi
Chi square	296.3	81.48	61.64
df	1	1	1
P value	<0.0001	<0.0001	<0.0001
P value summary	****	****	****
Are the survival curves sig different?	Yes	Yes	Yes
