# Supplementary material for: エンドトキシン吸着療法(PMX) (特集 間質性肺炎治療法の新展開)
Source: eLife journal article supplement (doi:10.7554/elife.61459), 2010-04-01
Supplement: supp [file elife-61459-supp-v1.zip › elife_poa_e61459_Figure_6_source_data_1.xlsx]

## Sheet: Data
Figure 6-Source Data 1: ORO staining in wild-type N2, hrde-1(tm1200), and prg-1(tm872) CON and PDStv one-day-old adults from P0, F1, and F2 generations.
ORO Intensity (A.U.)
N2 CON P0	N2 PDstv P0	N2 CON F1	N2 PDstv F1	N2 CON F2	N2 PDstv F2	SH383 hrde-1(tm1200) CON P0	SH383 hrde-1(tm1200) PDstv P0	SH383 hrde-1(tm1200) CON F1	SH383 hrde-1(tm1200) PDstv F1	SH383 hrde-1(tm1200) CON F2	SH383 hrde-1(tm1200) PDstv F2	WM161 prg-1(tm872) CON P0	WM161 prg-1(tm872) PDstv P0	WM161 prg-1(tm872) CON F1	WM161 prg-1(tm872) PDstv F1	WM161 prg-1(tm872) CON F2	WM161 prg-1(tm872) PDstv F2
60.706	30.353	6.327	40.6	67.553	30.49	42.36	5.166	15.765	9.492	49.47	9.067	15.271	11.457	65.163	50.708	30.885	52.115
35.95	5.697	52.562	14.768	34.87	26.586	18.222	6.115	30.191	31.529	54.969	20.346	8.441	46.907	32.891	61.272	39.809	47.062
4.255	8.381	24.321	40.87	30.015	41.509	18.6	10.368	30.532	8.084	11.167	52.892	11.968	9.469	43.942	43.511	22.104	16.104
32.231	29.46	58.6	50.982	40.512	60.837	30.921	2.708	21.369	40.274	11.986	15.338	4.989	2.604	53.5	37.229	30.333	23.75
8.913	16.161	53.835	59.223	51.074	56.543	3.886	12.106	20.242	14.96	11.113	37.805	9.715	19.365	53.215	43.535	17.752	63.077
26.666	7.477	66.484	57.528	72.251	55.13	19.557	9.271	8.904	34.819	7.78	36.334	27.561	11.971	32.793	33.919	5.43	3.052
12.419	35.397	55.037	18.177	42.176	8.655	30.425	13.045	21.286	37.724	28.851	61.557	26.943	13.184	24.398	35.703	50.948	29.431
34.303	19.425	47.388	56.661	33.005	50.072	37.364	13.845	14.207	0.356	29.647	19.902	14.153	5.867	54.781	41.147	49.082	54.656
8.167	23.641	56.285	56.23	53.043	51.781	16.622	8.778	39.801	20.903	28.211	33.53	9.441	9.414	50.635	49.361	69.085	38.85
72.987	19.566	50.503	56.318	90.772	31.796	29.448	1.633	29.637	32.202	41.299	57.181	19.623	9.862	43.968	51.512	49.991	25.163
61.524	17.191	64.737	36.942	67.273	5.845	21.819	14.198	17.974	25.411	28.496	60.956	34.017	23.849	48.165	31.634	54.84	60.3
26.012	3.129	9.065	55.914	73.6	70.201	10.512	20.838	44.681	12.863	41.229	56.816	37.014	3.815	50.352	47.437	54.454	62.939
40.778	19.473	20.958	69.931	61.959	39.229	14.91	8.563	7.341	31.115	48.143	30.086	39.847	8.143	11.45	54.121	54.423	34.29
15.045	5.088	52.235	36.181	37.318	60.438	22.809	3.565	32.726	16.931	32.711	42.743	7.68	29.405	58.573	46.896	37.228	58.866
50.645	16.109	49.127	20.345	33.63	71.388	17.386	2.657	47.048	31.536	52.903	61.747	27.695	23.475	34.977	48.086	35.681	72.882
12.72	3.371	69.679	83.032	49.789	21.733	38.266	-0.717	18.645	51.519	8.086	17.202	29.941	46.606	25.076	40.446	54.796	51.936
27.989	-1.75	55.947	55.096	43.142	37.732	28.769	22.593	29.043	44.135	42.051	47.981	46.212	23.679	56.072	58.919	56.428	49.487
47.769	16.009	30.79	53.54	68.915	102.483	41.252	0.461	52.177	46.768	16.471	57.535	34.369	12.621	64.195	60.507	46.513	47.352
30.91	41.026	21.966	40.707	64.397	56.322	21.548	1.812	17.132	34.527	57.897	34.929	32.785	8.124	53.935	55.807	43.031	59.109
50.577	3.772	47.04	38.444	83.215	69.455	31.719	10.921	37.773	25.881	19.421	61.734	28.681	6.715	62.957	52.87	51.694	61.063
12.184	7.217	93.946	57.679	85.722	76.28	22.578	9.894	51.963	32.111	44.56	60.34	39.46	4.268	61.975	60.525	47.804	63.06
52.46	4.877	74.427	69.417	71.317	7.343	33.775	10.742	39.726	29.594	11.261	7.751	13.281	17.955	46.718	53.328	45.866	53.8
34.021	12.788	62.788	40.321	75.02	74.499	15.804	15.397	44.452	44.793	47.542	9.955	19.573	18.233	42.122	47.096	29.054	63.912
30.392	7.322	74.443	66.909	26.569	15.101	38.2	10.715	31.404	21.587	36.835	60.273	18.314	11.127	56.284	40.118	36.114	46.967
19.492	12.55	19.652	28.163	43.515	80.963	24.952	11.769	28.773	21.738	33.513	61.098	-1.02	11.81	33.393	39.57	37.981	49.858
52.718	7.397	85.222	43.759	23.697	37.575	28.927	9.863	20.204	20.161	13.51	28.882	8.503	7.816	33.535	40.835	40.397	51.097
42.882	5.314	44.805	58.898	50.711	75.909	29.646	10.118	40.463	35.574	26.433	46.6	28.263	19.168	67.34	30.234	55.516	27.489
15.313	12.576	39.609	25.966	47.356	35.799	28.367	1.297	28.359	38.29	8.538	37.308	5.928	42.784	54.539	53.38	48.102	37.372
12.495	3.172	34.859	89.246	22.312	35.275	11.374	13.096	35.074	33.349	15.657	13.117	39.058	7.054	69.814	52.515	43.606	44.451
60.366	1.171	53.154	69.703	93.789	24.193	29.858	28.117	33.196	8.99	36.675	56.193	9	19.048	41.04	33.782	43.919	42.786
12.505	13.839	42.465	23.123	66.229	11.237	40.449	8.963	43.986	27.048	47.624	41.271	7.608	1.798	66.699	48.494	55.604	56.302
17.751	4.25	68.957	30.297	13.235	18.056	8.895	12.626	5.959	42.773	44.06	2.138	21.721	7.7	57.944	41.128	12.263	65.496
29.935	8.321	19.643	72.762	98.336	68.609	10.799	12.038	28.773	26.636	22.02	24.913	27.515	11.49	32.42	53.715	13.398	41.868
30.234	1.916	40.77	47.748	31.308	49.241	-0.575	1.547	29.605	17.114	41.25	14.683	19.056	34.202	54.537	50.295	52.871	64.988
26.589	5.236	48.856	60.568	41.845	35.965	0.785	1.91	14.203	8.198	42.092	13.612	69.907	15.762	57.414	61.307	51.941	59.516
40.415	-0.435	58.658	42.306	81.808	45.045	4.59	2.157	42.996	32.867	53.253	13.767	67.766	25.944	63.086	38.905	45.679	60.79
25.517	13.12	74.434	58.412	69.256	38.192	41.278	5.487	16.106	28.251	51.289	13.881	21.359	9.495	46.208	41.905	27.807	63.708
55.717	10.621	60.976	61.893	3.223	70.663	24.438	6.264	33.93	44.903	47.945	23.231	33.262	9.177	32.285	45.184	39.288	62.302
27.82	30.382	84.521	29.608	50.986	42.835	-2.371	4.536	17.697	48.709	37.378	28.517	2.642	8.903	52.931	31.445	37.314	32.785
14.024	1.665	68.032	43.867	85.593	28.371	45.913	10.573	32.829	20.395	38.968	20.515	47.113	7.761	67.451	32.089	59.741	46.475
47.054	8.048	74.605	80.383	44.215	42.207	22.496	6.482	1.778	29.208	22.239	23.361	12.512	10.019	41.602	42.749	43.774	53.706
34.324	29.141	43.847	48.624	37.849	47.856	1.624	16.722	5.194	17.006	40.934	39.072	66.693	6.811	1.778	38.46	52.041	37.471
53.118	20.21	35.841	32.749	70.569	49.967	39.779	2.442	15.616	53.902	40.269	23.748	50.976	7.283	5.194	41.898	18.435	50.774
57.81	36.493	58.053	47.05	84.152	57.196	37.512	6.621	22.362	33.108	24.976	38.861	33.563	7.39	15.616	52.118	52.041	42.259
24.556	18.959	63.285	76.621	59.968	60.856	16.946	2.183	24.898	45.956	16.853	39.511	50.776	48.178	22.362	17.006	27.214	54.774
22.943	46.362	79.362	26.545	9.204	33.832	70.552	8.2	53.635	12.675	43.179	48.553	76.106	6.569	24.898	53.902	83.641	57.327
44.855	15.718	47.2	30.982	103.618	91.064	-6.885	46.964	36.116	18.721	37.232	23.722	53.144	17.853	53.635	33.108	58.944	30.678
40.897	0.952	58.312	29.789	59.732	101.022	54.058	13.193	-0.946	27.663	36.487	44.284	4.969	16.109	36.116	45.956	66.1	64.008
20.635	27.411	40.227	38.539	40.033	54.082	6.845	0.638	7.103	53.738	55.55	40.74	7.825	9.932	-0.946	12.675	30.413	52.343
28.583	8.542	43.95	45.97	56.532	85.597	38.663	-0.454	37.072	39.373	28.304	19.286	55.629	15.062	7.103	18.721	51.244	42.929
13.334	3.976	44.069	85.402	77.316	47.737	18.587	12.014	2.167	21.504	40.298	12.992	37.837	5.916	37.072	27.663	90.923	67.18
49.292	17.544	7.445	83.145	70.832	94.766	34.437	14.724	43.091	34.291	9.168	24.863	60.828	15.185	2.167	53.738	82.203	54.171
39.588	24.221	42.634	29.248	49.809	36.613	60.403	3.486	30.843	31.561	47.108	14.71	82.899	5.714	43.091	39.373	94.344	53
41.601	4.672	59.885	38.913	17.889	47.5	62.826	4.059	10.831	52.856	43.385	20.497	33.13	5.559	30.843	21.504	68.95	37.934
58.683	47.924	101.472	51.114	75.755	35.716	40.463	21.464	42.82	40.886	41.943	28.287	58.148	10.909	10.831	34.291	63.705	71.542
18.946	30.709	16.564	78.608	29.387	29.557	2.966	7.847	13.812	54.397	44.703	42.908	49.691	4.223	42.82	31.561	69.906	65.59
34.861	11.119	79.724	9.877	39.476	20.074	10.304	2.518	35.663	51.137	38.783	49.998	57.778	13.505	13.812	52.856	49.888	62.992
42.93	54.195	25.75	19.298	59.794	84.219	7.001	16.253	36.993	22.514	20.279	35.262	37.477	9.958	35.663	40.886	61.59	75.541
39.497	30.17	67.876	52.379	58.503	44.934	59.241	7.642	16.548	47.308	42.749	28.976	71.442	4.367	36.993	54.397	54.966	44.377
42.61	17.955	57.397	48.291	63.305	25.41	47.137	10.061	41.847	43.17	20.821	23.32	32.06	13.289	16.548	51.137	52.901	59.618
34.352	9.938	27.977	46.079	55.184	78.011	58.155	16.188	48.536	38.798	40.993	33.126	51.916	7.813	41.847	22.514	79.42	54.235
21.741	25.592	6.541	11.365	29.882	6.563	6.042	15.801	5.483	57.135	45.618	56.055	46.475	0.251	48.536	47.308	84.423	42.699
38.331	4.419	-16.404	36.696	60.334	66.828	37.441	2.974	5.744	27.087	40.807	18.472	30.525	6.554	5.483	43.17	55.345	34.408
32.64	18.301	60.545	66.385	40.155	46.039	59.098	7.462	44.022	38.603	37.299	25.243	27.089	24.754	5.744	38.798	77.247	60.33
32.873	20.918	68.728	73.752	61.331	41.438	14.129	17.041	3.823	12.102	54.369	13.23	20.566	4.717	44.022	57.135	55.399	55.133
22.34	4.412	39.591	53.113	54.992	37.176	10.868	0.703	3.325	42.589	43.636	28.151	43.202	8.346	3.823	27.087	42.139	70.954
26.94	14.693	32.952	40.203	46.467	46.518	10.462	13.325	29.617	27.985	21.386	42.916	45.306	5.19	3.325	38.603	66.99	56.164
41.723	33.959	10.422	61.705	18.168	43.746	58.361	12.28	63.817	29.69	34.464	31.328	48.642	0.435	29.617	12.102	64.769	74.367
40.837	2.553	57.327	25.267	47.764	50.793	60.225	4.816	69.149	49.169	51.952	42.061	36.316	14.243	63.817	42.589	15.284	48.557
21.559	8.824	73.323	66.309	51.003	4.895	2.453	-0.376	10.842	59.566	56.304	17.034	47.804	24.034	69.149	27.985	33.199	71.729
52.994	47.881	38.242	56.884	54.386	69.256	39.263	11.184	11.455	35.885	19.958	34.229	46.929	15.494	10.842	29.69	50.183	52.979
32.758	23.174	36.653	79.195	44.908	5.686	42.953	8.889	-1.503	27.042	67.115	57.604	51.369	0.946	11.455	49.169	46.852	76.95
79.828	6.355	28.504	28.584	37.852	38.243	42.177	30.799	15.363	47.936	52.771	30.215	43.38	27.442	-1.503	59.566	64.351	53.173
19.145	17.728	27.265	41.177	50.731	13.419	65.03	15.542	50.786	51.795	17.65	51.278	43.814	13.729	15.363	35.885	58.797	53.351
45.786	10.318	53.567	80.631	48.46	60.498	46.736	1.617	41.713	30.882	44.14	25.638	47.899	1.193	50.786	27.042	10.121	48.204
21.673	14.004	52.727	70.997	-0.754	75.475	36.165	12.804	-0.334	17.019	46.345	41.837	25.019	8.699	41.713	47.936	58.25	52.127
29.418	17.829	22.555	36.69	75.92	76.107	51.248	55.495	32.015	36.562	38.544	23.097	51.895	28.336	-0.334	51.795	54.993	54.856
16.921	13.151	43.363	64.994	38.914	79.793	48.696	50.005	4.846	41.92	58.227	44.53	32.33	22.578	32.015	30.882	20.136	75.187
38.705	14.68	66.62	62.495	35.165	54.06	72.052	53.944	14.713	21.272	39.195	50.645	46.294	26.955	4.846	17.019	72.422	83.37
31.456	4.14	23.993	35.22	59.765	47.109	48.519	38.815	19.15	38.376	40.296	23.302	43.325	17.166	80.683	36.562	80.73	76.509
40.568	3.148	25.772	58.575	42.389	28.887	60.892	33.299	22.54	59.725	76.848	63.704	24.263	29.184	62.48	41.92	33.573	61.846
77.793	7.955	43.453	86.907	18.931	33.691	59.196	64.905	31.418	13.16	58.609	39.492	48.595	24.661	64.977	21.272	66.725	65.972
61.251	13.105	24.524	49.417	22.891	84.81	47.113	67.636	64.556	25.159	43.369	25.267	13.325	30.337	20.391	62.363	81.47	63.804
46.973	35.168	52.743	54.841	35.489	-0.399	50.167	41.759	53.262	32.767	71.018	52.721	12.28	25.073	68.59	63.951	12.41	66.469
46.813	36	26.771	46.372	64.233	40.676	22.799	63.623	28.663	36.627	38.22	29.509	4.816	59.814	22.909	76.173	6.374	88.286
59.85	2.786	58.619	27.682	31.268	76.964	57.335	63.666	23.291	68.293	66.365	47.508	-0.376	34.884	39.763	45.151	62.499	89.693
47.78	20.324	78.41	49.823	68.571	35.53	29.45	44.025	65.39	40.575	61.826	53.205	11.184	79.19	32.757	51.279	67.397	64.821
3.849	9.2	62.374	61.218	34.11	14	57.598		40.534	32.914	37.596	35.894	8.889	47.238	47.975	87.913	36.735	42.066
54.414	7.824	56.91	86.474	70.124	45.473	64.31		46.685	36.802	54.332	28.972	30.799	61.856	13.373	81.078	41.207	73.06
43.431	-1.151	67.454	64.841	-23.487	45.154	58.769		26.386	40.914	47.261	54.662	15.542	42.63	3.19	70.538	79.416	67.178
42.505	6.65	54.62	20.812	31.023	55.019	46.714		45.207	53.251	33.964	19.443	1.617	75.6	42.265	57.344	55.28	71.53
13.889	17.955	8.929	47.779	11.731	50.646	58.075		32.87	45.784	32.089	40.891	12.804	59.146	29.05	47.256	12.367	46.502
28.772	52.107	7.602	72.998	4.032	77.828	47.715		62.854	41.13	57.126	30.699	70.672	46.553	23.073	71.772	65.471	57.703
12.823	8.346	13.067	47.783	86.31	39.224	67.27		25.063	60.62	58.44	23.005	55.57	54.789	25.928	69.352	45.942	67.229
48.276	6.012	5.127	65.354	59.968	31.902	58.429		55.407	63.711	47.545	20.315	79.1	59.165	31.695	70.091	31.946	73.557
38.323	10.298	7.929	54.492	70.06	42.98	58.146		21.872	32.093	43.415	52.339	51.125	68.999	41.2	64.573	83.169	55.85
32.174	6.41	59.189	49.343	79.643	45.502	44.021		47.654	38.787	32.001	49.969	55.344	65.46	-2.288	65.579	63.102	58.894
34.092	22.971	22.222	61.327	45.188	51.824	57.967		64.789	33.966	57.248	58.741	63.738	37.206	1.43	50.215	41.033	77.92
16.186	14.885	30.952	34.975	33.118	44.284	42.909		67.86	52.866	23.209	39.706	66.384	56.261	36.407	62.668	8.367	82.263
24.48	-3.925	60.266	77.498	51.627	45.198	73.311		48.469	35.199	32.883	44.936	14.925	10.051	4.724	58.966	46.994	66.148
37.702	19.685	78.689	45.346	64.907	45.4	52.912		31.248	57.838	43.854	54.135	52.317	39.832	33.711	58.713	67.312	80.188
28.474	-3.739	25.484	79.636	75.128	32.136	69.807		60.87	63.291	53.757	34.081	69.473	48.019	72.852	43.384	5.58	61.766
42.163	3.261	35.055	54.376	5.988	51.036	50.594		22.629	58.518	50.794	42.912	91.805	75.715	58.713	60.292	64.116	86.576
14.279	15.229	58.06	67.399	60.551	54.5	48.325		49.756	58.284	41.403	22.589	60.517	64.516	72.475	11.497	54.281	41.145
31.312	12.82	40.34	51.222	36.084	64.981	68.9		32.994	61.635	61.508	37.706	77.403	69.17	78.948	67.04	63.388	50.543
57.54	0.131	42.218	69.972	6.084	54.687	51.184		11.453	45.849	62.808	58.235	82.657	18.872	29.665	59.035	63.558	70.2
25.045	0.29	67.032	49.349	60.108	7.43	54.873		27.498	9.336	31.013	38.527	48.302	63.772	36.81	63.261	57.884	41.176
59.931	20.494	59.074	60.172	55.545	8.58	32.418		63.717	12.312	35.591	24.087	74.205	40.693	46.892	84.84	17.919	61.908
26.569	13.182	71.219	59.528	46.383	49.742	45.97		36.26	41.295	26.226	21.109	75.79	65.636	40.516	71.843	58.887	64.587
42.731	-2.372	55.241	39.789	56.622	66.504	62.741		22.545	56.488	34.446	45.996	21.942	53.738	69.421	92.867	24.806	81.371
25.567	2.895	34.222	50.72	23.927	62.37	60.282		24.67	41.311	73.413	31.774	51.514	27.434	57.114	65.754	37.553	65.07
28.364	-1.717	73.08	56.623	47.611	14.041	47.226		17.026	14.241	44.052	32.209	80.105	40.984	68.073	80.76	53.487	66.216
52.695	-1.535	62.366	55.902	9.151	53.808	55.841		50.951	44.029	74.85	54.02	38.894	68.148	68.295	73.522	42.228	73.352
60.972	10.396	38.054	53.707	23.139	7.259	19.313		48.73	71.99	64.716	52.171	6.174	69.811		73.981		31.246
39.312	49.012	71.212	60.714	58.374	23.387	47.583		24.427	53.869	61.606	82.195	31.134	76.747		63.23		53.574
52.7	6.999	48.437	61.25	46.12	40.051	17.95		46.433	54.538	63.736	35.063	77.911	37.159		64.341		80.553
47.816	-1.314	39.925	65.854	52.33	55.928	54.807		42.794	6.228	35.351	36.259	82.644	41.179		61.435		87.211
21.214	4.381	71.146	65.248	61.105	50.642	59.045		14.054	63.853	42.346	46.674	37.207	14.603		59.264		71.326
67.917	2.513	71.642	55.997	21.22	47.207	54.222		34.211	52.118	58.501	56.348	39.594	25.551		71.641		61.813
34.314	10.397	8.481	53.115	66.539	51.641	59.608		26.67	31.65	37.331	56.082	66.2	43.385		49.98		78.345
36.709	2.693	13.76	66.05	27.763	53.767	20.967		37.608	28.402	76.012	23.667	94.5	22.133		43.522		82.626
20.363	-6.214	14.391	61.643	66.724	44.513	49.296		31.861	49.8	29.329	21.396	74.669	55.694		49.644		74.082
59.057	-2.094	55.478	57.563	7.692	42.887	26.165		13.415		48.215	53.887	43.08	13.75		79.496		63.656
39.96	-0.039	20.984	59.285	29.789	47.874	23.448		38.101		43.196	61.08	77.542	22.266		93.952		65.651
33.143	25.389	54.738	52.204	98.107	89.659	10.463		51.529		59.367	74.034	75.056	31.884		77.169		40.861
61.481	19.802	62.673	65.521	38.611	40.799	23.746		57.76		67.485	39.09	60.208	64.734		41.368		48.359
49.498	22.686	54.545	76.127	35.863	33.295	58.024		52.905		62.99	52.563	32.574	48.787		64.087		56.357
54.7	42.635	22.519	30.477	45.218	55.705	37.779		54.583		51.902	29.024	68.188	42.889		81.125		81.308
46.167	11.488	54.287	66.65	50.367	13.597	30.978		15.854		75.657	40.91	92.934	66.865		70.227		33.326
8.206	11.972	78.372	45.422	54.734	35.843	16.937		35.193		53.655	58.244	85.923	47.111		44.869		55.283
48.875	3.596	48.37	52.821	40.853	33.578	60.269		59.497		36.535	33.18	79.124	86.139		69.018		53.062
50.157	7.154	53.377	79.458	70.499	50.8	47.838		75.359		70.588	44.499	92.905	56.145		89.41		35.207
5.672	9.89	28.62	57.538	57.102	45.216	40.507		54.53		61.614	69.135	91.134	74.679		96.436		68.026
-2.712	11.265	41.339	88.458	66.475	105.829	39.251		34.953		75.973	25.756	83.99	60.283		85.225		59.403
47.817	22.226	57.2	66.152	65.556	47.732	19.578		24.471		21.807	45.156	93.241	72.782		65.52		72.711
70.436	-0.903	48.957	59.594	83.5	61.498	59.523		59.673		11.478	25.135	47.734	78.441		66.536		69.346
39.264	10.683	17.609	60.215	71.077	55.219	48.09		64.584		21.431	35.368	56.791	61.232		84.245		77.167
51.409	22.179	51.147	30.883	63.421	55.893	63.644		55.732		33.086	31.846	57.312	56.563		60.492		73.071
56.478	11.787	84.489	45.747	23.675	24.392	21.077		42.479		45.683	53.728	65.782	69.814		93.494		63.318
33.687	4.293	63.475	72.003	40.352	39.034	40.775		46.503		76.968	80.792	54.092	79.855		27.405		39.141
43.231	11.372	25.704	64.442	6.922	50.318	57.651		54.821		41.101	71.407	71.349	60.209		71.379		61.371
26.778	21.319	40.974	79.355	81.272	50.909	64.182		43.338		42.701	57.389	59.638	70.251		94.222
40.541	10.241	56.397	54.5	66.735	40.925	19.285		44.736		52.231	76.479	89.001	15.127		79.659
10.951	3.755	46.529	53.597	39.129	52.755	13.12		79.739		68.11	36.293	77.354	62.166		79.409
22.808	7.118	22.883	62.938	47.263	28.999	20.543		76.18		64.561	70.542	89.147	23.117		66.701
46.228	10.132	47.677	80.765	39.792	51.312	17.165		64.241		42.492	31.425	89.398	74.726		59.554
33.745	24.454	45.615	57.423	42.653	76.505	39.124		55.008		69.035	34.945	73.716	60.621		93.395
51.068	48.645	29.577	59.014	44.719	98.845	64.064		66.357		59.902	50.475	85.609	65.465		51.266
59.658	11.397	53.098	62.929	33.398	53.633	48.393		62.24		56.762	49.459	41.289	71.436		72.493
41.411	8.891	81.021	34.71	63.002	31.113	24.119		70.686		53.304	31.37	14.408	67.598		43.49
58.408	26.014	39.452	80.336	36.457	60.706	50.063		60.331		61.416	48.307	86.674	45.915		40.729
44.037	46.123	48.231	35.524	60.692	44.106	57.431		39.772		64.817	54.854	80.798	68.547		82.516
48.642	31.688	58.806	73.234	80.746	13.705	16.971		60.963		18.675	29.713	80.545	37.342		62.937
46.24	57.141	50.091	33.814	65.407	59.233	43.034		53.518		61.479	49.194	86.171	49.871		85.505
28.675	5.152	28.886	55.246	65.25	42.974	45.75		28.782		51.871	65.106	73.883	87.598		71.236
38.614	10.179	79.117	75.532	63.365	47.208	33.584		43.201		68.992		65.034			96.896
29.97	7.854	64.631	29.877	38.589	6.468	32.839		34.244		9.106		66.093			73.099
38.664	4.7	51.565	91.44	37.825	43.931	45.48		65.594		55.163		44.464			45.052
21.775	8.331	47.765	63.905	42.721	21.716	62.005		58.773		53.87		86.603			82.04
35.691	19.502	25.624	26.365	50.372	58.947	58.825		54.796		16.724		92.862			74.728
25.249	11.716	79.968	59.25	50.274	18.645	36.393		55.769		31.808		85.851
35.108	12.901	8.958	61.282	62.636	87.875	16.877		52.882		41.362		64.011
28.477	40.888	31.386	59.008	5.659	34.88	37.812		41.214		58.429		52.558
70.642	6.862	98.784	58.811	42.573	-4.485	53.474		54.954		70.708		83.685
29.749	7.098	41.356	62.263	58.166	51.165	61.386		41.273		55.886		57.931
25.106	12.646	17.375	84.451	-0.446	31.027	48.227		28.966		19.967		82.046
25.057	21.673	48.247	80.008	32.515	49.254	35.309		52.175		59.821		81.323
51.534	17.621	63.774	67.338	56.839	29.114	35.575		68.681		31.759		81.081
33.348	10.133	55.774	68.74	50.48	41.165	57.208				40.113		48.939
31.389	13.949	58.738	55.812	40.725	63.528	45.167				32.044		68.526
37.842	38.936	34.905	49.028	63.467	58.816	36.541				75.187		89.737
48.375	14.502	87.766	46.49	57.699	30.421	18.669				56.775		45.58
29.847	24.219	71.092	71.504	30.438	51.542	53.448				35.669		84.451
55.187	7.981	46.216	78.525	45.693	27.499	28.004						81.881
74.504	2.11	79.228	64.932	48.318	86.205	41.169						87.648
27.004	20.476	65.301	63.578	53.607	87.094	43.222						67.179
52.768	20.135	48.099	80.902	45.793	37.007	67.76						58.592
39.781	36.625	78.073	13.72	76.483	25.703	40.112						83.564
53.963	10.139	8.727	31.189	72.496	28.138	37.789
69.98	8.055	44.572	25.446	43.916	94.825	46.258
40.332	8.916	68.329	63.109	64.234	41.091	34.109
13.957	22.724	40.831	74.441	51.24	35.491	43.089
45.472	0.785	22.262	51.609	21.534	46.042	44.538
73.02	11.365	47.731	62.609	61.491	45.529	46.892
13.207	60.217	47.927	41.323	36.968	18.255	47.488
37.14	24.674	45.113	35.794	66.398	50.809	47.372
21.84	6.697	48.152	81.046	65.436	58.311	37.007
29.624	25.586	29.828	60.129	46.178	51.466	58.622
62.695	40.277	37.984	54.784	76.262	44.938	20.152
45.407	15.887	36.496	67.632	63.811	52.357	61.093
34.298	8.199	42.328	49.357	64.713	49.477	37.26
38.524	7.756	72.613	76.561	56.878	44.453	58.274
52.976	11.845	54.101	86.023	44.629	34.12	39.144
32.267	15.839	53.339	72.403	66.95	54.998	10.951
27.673	13.605	33.708	66.19	28.651	82.778	31.69
53.052	34.009	64.373	71.763	32.375	25.496	62.039
30.64	18.133	24.384	54.286	41.311	73.833	82.738
30.138	20.826	62.733	52.072	24.785	51.299	33.154
9.862	14.936	9.923	60.855	18.095	69.79
44.929	20.491	24.929	72.052	71.085	59.168
63.121	9.012	56.203	80.432	49.58	30.823
53.699	30.633	37.837	91.417	95.724	75.869
32.364	6.095	33.146	68.811	63.327	58.589
40.802	41.626	56.39	33.543	54.591	63.964
44.383	7.625	44.48	68.04	34.122	50.362
64.081	10.664	38.725	86.522	36.948	62.949
19.552	18.965	46.985	51.068	50.375	73.915
38.358	23.588	31.386	61.549	49.605	73.274
41.156	49.391	40.46	81.659	39.542	90.581
21.477	15.061	23.456	50.6	34.139	63.046
41.964	25.528	43.121	83.644	66.879	44.247
35.997	23.675	55.395	40.454	79.871	54.058
52	25.372	54.61	58.799	56.988	41.489
63.465	26.743	45.996	47.883	41.071	85.616
38.061	52.247	52.986	65.267	31.387	51.062
50.479	24.508	48.819	52.872	29.359	54.913
47.678	48.751	33.556	55.706	34.549	92.291
49.089	11.313	50.141	60.927	85.638	72.794
39.254	16.332	62.494	55.912	28.429	58.906
27.705	14.623	48.782	57.187	6.216	39.31
26.635	6.741	76.052	61.897	52.473	47.341
59.154	38.863	26.964	45.744	56.79	44.42
24.94	14.055	64.849	58.06	84.531	52.547
31.284	5.04	49.712	67.098	65.933	55.536
58.224	4.387	65.451	36.382	90.37	63.959
13.493	6.206	39.279	78.91	67.526	66.094
9.344	2.315	43.142	64.569	40.287	63.431
22.916	15.123	51.298	48.78	27.257	67.884
7.475	19.933	14.881	71.784	77.118	62.105
10.786	10.776	64.166	51.843	36.692	62.348
29.218	16.07	45.762	56.434	71.325	46.961
14.497	12.034	9.958	61.906	46.643	52.54
9.902	-4.591	79.487	75.031	74.769	40.782
10.234	0.417	36.109	73.431	41.359	62.177
4.536	9.68	55.505	48.738	80.486	41.861
9.725	-17.823	43.641	43.321	58.39	81.828
15.12	36.58	59.318	86.871	75.844	57.045
6.38	13.065	69.293	39.833	32.411	68.322
22.906	3.919	44.842	59.708	50.845	61.346
17.993	10.794	37.051	69.281	58.741	46.741
7.306	22.463	60.804	96.983	47.271	29.672
28.911	29.764	55.2	67.814	46.438	42.489
26.421	25.171	37.69	53.923	40.715	95.383
5.75	12.493	69.237	89.544	35.48	81.708
4.422	-0.647	87.536	78.979	35.675	52.557
10.294	13.241	14.857	49.059	44.893	34.964
12.031	18.899	33.809	81.944	59.881	61.924
18.676	11.045	52.69	55.715	72.752	42.461
17.152	31.35	51.698	29.234	54.084	63.135
7.78	32.404	45.448	25.683	70.392	37.56
6.883	32.501	47.199	40.256	36.388	28.598
5.243	11.191	-0.873	29.909	28.154	15.617
23.641	4.996	65.935	9.763	8.965	34.87
22.196	0.585	55.111	14.342	28.621	42.23
30.994	17.005	67.371	15.938	19.916	7.18
39.88	4.756	56.855	17.524	10.587	44.459
8.97	4.692	75.068	44.625	9.321	16.235
52.536	12.79	62.874	38.422	63.482	29.939
18.154	2.184	12.558	31.008	45.194	10.037
48.466	0.22	60.26	32.331	25.214	16.244
34.321	2.44	66.514	6.39	12.807	41.507
12.943	7.101	45.01	8.829	47.521	50.671
7.379	6.043	55.592	41.723	5.74	38.841
7.312	16.829	65.04	35.806	34.034	43.184
10.286	18.44	62.712	39.37	39.308	50.859
30.7	5.162	33.183	36.256	37.688	-1.458
66.983	17.193	77.735	44.625	31.683	14.637
30.945	6.014	49.452	32.752	33.8	29.659
34.452	5.575	24.163	35.311	33.986	12.783
51.871	11.538	59.912	27.571	16.973	34.037
50.988	12.394	31.9	27.017	42.979	42.765
19.799	-5.21	12.698	36.225	30.877	5.87
40.908	13.902	44.359	37.203	35.71	29.113
18.385	27.984	4.992	36.558	15.255	7.557
59.6	10.648	44.515	29.566	16.087	8.693
15.567	31.605	71.383	34.638	18.213	40.613
10.078	40.447	42.658	28.444	30.088	43.169
49.431	33.763	55.067	23.745	56.866	27.516
10.358	1.13	64.577	27.801	64.518	22.343
15.622	9.545	51.878	21.653	40.193	28.121
6.098	17.259	30.893	28.588	24.063	23.51
6.306	17.46	48.877	28.743	43.349	31.599
62.377	3.391	46.394	40.397	24.792	50.207
18.49	47.997	13.441	28.736	27.639	31.017
45.659	26.422	53.207	30.044	18.567	9.982
3.931	15.934	52.471	4.396	35.004	25.648
-0.238	15.499	12.642	31.192	43.672	35.121
56.471	44.149	49.732	40.758	26.623	32.541
30.62	53.549	41.834	43.906	20.888	21.29
1.409	43.231	61.113	5.539	42.897	16.647
12.218	16.253	85.464	34.596	21.493	14.942
4.757	12.396	66.889	46.578	12.084	39.756
0.137	22.055	49.211	38.375	35.719	39.122
51.582	52.053	48.962	32.841	39.414	41.921
11.497	18.499	35.515	60.02	18.643	18.988
38.172	16.257	49.501	35.051	35.075	29.443
8.745	3.144	54.975	15.271	47.68	26.458
13.167	5.119	83.965	47.8	28.139	31.167
39.601	16.931	54.116	28.802	45.627	38.345
28.237	58.565	51.808	16.806	27.074	11.599
5.493	37.919	42.132	34.158	42.714	38.867
29.389	33.348	57.417	45.175	49.101	43.228
41.5	42.745	47.315	46.081	42.194	39.413
11.898	30.707	67.819	54.053	49.985	47.717
32.256	16.963	22.899	50.607	33.413	34.559
21.359	0.027	75.797	50.244	40.343	20.071
75.807	16.584	63.265	46.713	46.205	28.639
2.922	24.109	71.367	49.352	42.586	36.023
-4.672	9.246	58.662	39.309	40.122	47.372
54.22	22.462	64.183	13.437	49.825	42.607
33.29	-0.551	53.961	41.773	12.551	22.538
4.206	1.451	37.77	29.182	47.016	26.208
39.766	33.508	59.817	56.903	26.997	50.665
13.383	26.511	44.775	19.075	14.24	39.62
42.602	19.278	45.838	44.677	8.861	41.782
-0.623	12.203	23.7	24.446	33.024	49.946
33.265	3.944	52.79	60.841	22.368	37.962
44.583	5.847	58.435	50.663	36.087	16.812
28.861	2.203	52.065	35.131	41.937	30.179
33.423	8.512	44.663	34.833	47.002	36.246
52.241	10.19	74.148	58.342	50.644	14.784
44.962	17.305	46.185	59.645	25.9	19.519
39.954	29.794	60.823	46.765	28.063	30.357
33.273	18.361	71.888	39.39	38.344	46.571
44.847	3.691	52.494	30.962	54.582	50.949
29.852	12.256	46.348	60.647	55.931	30.448
49.364	2.546	52.979	50.515	32.321	5.476
42.229	2.67	52.102	57.707	32.568	24.118
22.169	14.048	85.297	14.769	33.333	14.65
48.888	14.861	13.966	14.973	35.324	14.694
42.379	2.903	23.026	59.098	22.403	40.6
36.666	33.099	24.185	60.313	57.56	12.466
50.692	21.876	21.213	58.398	54.033	37.944
41.957	25.87	60.601	13.55	54.068	26.622
17.026	32.823	65.994	16.775	73.54	40.731
46.018	4.152	39.842	64.218	46.04	44.83
36.647	20.281	48.273	34.612	41.105	49.745
56.506	11.437	49.789	52.425	56.226	44.054
35.666	16.444	55.859	46.272	29.113	52.234
51.117	15.381	36.232	40.859	57.45	38.515
37.054	0.1	24.195	9.425	53.337	52.121
30.106	30.313	42.412	11.255	53.858	63.19
26.823	25.9	6.02	36.106	63.056	21.873
37.314	22.595	17.454	51.188	16.93	59.719
35.882	58.509	19.622	58.071	30.347	40.974
45.798	34.249	14.806	18.45	61.828	40.112
30.769	27.395	20.996	45.962	47.705	35.974
41.922	2.752	42.936	50.548	61.737	53.436
44.496	9.089	36.83	29.134	38.458	53.573
31.912	21.701	41.977	9.522	60.411	22.352
46.247	12.238	14.162	54.454	35.707	44.032
50.989	17.102	42.759	31.665	70.619	39.312
42.463	6.302	39.92	20.88	9.659	5.745
55.284	34.115	37.518	58.79	34.192	59.662
45.353	26.621	23.85	23.133	47.445	55.984
45.419	21.051	24.348	60.968	39.864	42.155
25.076	6.114	35.901	59.228	65.137	45.925
41.377	0.438	44.05	20.874	36.683	21.879
15.159	32.979	32.864	16.33	53.742	29.419
15.26	12.81	11.006	51.016	16.07	46.634
17.826	7.378	9.378	60.252	41.646	11.799
55.097	24.901	29.009	62.613	18.619	46.646
50.999	12.317	18.62	55.032	37.224	62.068
6.834	57.671	27.657	24.601	49.947	49.503
16.228	-4.235	39.511	14.701	57.247	24.132
15.866	2.367	24.445	59.653	31.905	42.951
16.57	8.328	22.543	9.151	22.145	50.68
7.358	0.671	20.127	62.485	63.258	56.522
37.32	24.902	28.678	63.087	20.248	34.486
25.505	-1.092	10.797	22.772	35.968	28.077
53.714	20.581	33.483	34.601	58.305	26.575
63.277	18.483	3.844	62.007	22.172	34.362
28.49	11.527	36.364	10.943	31.574	52.351
15.742	11.009	7.607	45.564	34.035	52.812
15.292	30.307	42.091	15.646	25.452	46.676
44.833	34.236	11.584	54.399	20.799	6.107
37.312	1.62	41.275	25.946	40.736	7.463
56.79	2.703	35.899	50.026	44.765	13.637
45.855	5.129	26.082	59.455	39.015	17.575
53.296	3.973	40.369	18.461	43.037	44.28
38.75	3.363	31.475	25.903	31.253	54.734
3.918	4.368	29.09	8.575	46.719	46.335
15.322	4.074	34.895	11.085	9.897	23.401
12.986	8.047	50.266	23.398	62.859	62.854
27.378	4.898	42.988	62.768	51.467	19.84
65.275	8.745	33	57.328	23.435	8.323
6.71	4.223	17.979	38.758	59.456	44.686
23.91	7.581	40.889	40.613	28.853	8.502
8.225	6.09	6.098	33.836	27.556	38.795
18.425	2.927	4.578	46.1	43.827	21.677
41.849	3.816	4.28	36.4	30.185	63.527
41.738	0.926	25.072	27.253	3.595	55.721
50.46	7.712	-3.9	59.586	76.641	48.013
27.997	8.402	-2.327	35.297	29.423	13.02
9.065	1.494	18.263	61.367	21.688	40.103
54.219	9.914	24.507	38.964	38.176	54.726
38.536	8.587	20.6	21.648	31.259	33.155
42.602	9.652	1.906	48.14	54.209	36.249
43.125	3.624	-3.02	64.596	56.986	6.699
47.11	6.351	40.963	39.289	27.158	57.72
14.58	2.509	31.692	11.988	54.035	48.771
35.05	5.118	46.652	8.595	65.216	36.563
38.917	9.364	31.762	26.14	46.584	23.858
20.803	2.919	-0.287	20.23	41.188	30.104
70.088	0.271	0.039	33.797	71.674	58.373
26.383	5.443	1.153	14.532	41.082	40.112
30.632	4.44	36.057	57.729	4.458	47.148
29.441	8.175	1.438	55.063	55.562	21.451
21.972	7.896	42.194	29.291	43.982	34.367
23.013	-0.624	35.929	43.275	47.47	39.806
37.778	5.863	7.538	56.537	63.601	67.884
67.652	1.523	34.344	19.659	69.855	62.745
53.202	2.741	15.991	14.177	48.075	37.757
51.507	3.158	34.865	25.273	49.902	54.687
18.509	35.398	30.086	47.78	63.315	40.891
21.047	7.479	22.072	19.144	57.443	49.802
47.418	14.911	3.408	55.514	51.516	48.097
26.429	27.189	22.313	58.004	38.243	46.572
29.441	29.258	22.77	68.128	45.092	47.633
35.616	15.794	12.694	65.035	66.127	45.958
50.754	13.372	25.681	42.981	36.38	30.582
19.106	37.356	-1.282	47.425	49.271	39.774
21.914	28.6	2.189	57.789	36.934	58.523
28.163	7.083	4.414	54.035	56.035	46.194
53.788	6.052	57.425	72.908	29.648	29.826
22.291	1.791	36.117	50.158	38.505	47.267
56.37	22.053	10.522	40.736	33.978	43.292
28.655	22.817	3.609	56.545	54.626	53.436
30.111	43.487	54.092		74.378	26.951
37.544	16.482	1.63		54.184	45.601
39.101	20.313	22.869		50.688	67.133
26.39	48.389	36.427		61.632	37.212
43.6	12.471	10.937		18.478	43.65
21.648	28.761	48.118		44.689	48.109
29.606	36.4	21.878		42.271	50.487
31.355	29.088	8.935		44.632	56.926
32.839	19.501	40.414		40.908	8.492
19.513	20.097	12.201		29.658	41.136
19.413	35.945	26.889		58.438	33.256
37.461	7.673	58.04		51.69	38.947
38.231	39.854	6.069		54.389	52.723
21.164	18.219	59.795		45.885	44.113
58.018	6.238	18.292		44.843	50.002
27.017	24.712	28.474		53.402	8.789
	30.198	75.129		40.856	63.917
	18.878	21.79		9.783	35.565
	-1.888	26.124		64.12	54.755
	24.081	51.646		50.166	57.955
	20.255	41.243		45.308	13.887
	16.756	50.039		52.189	42.126
	9.463	18.54		52.297	31.608
	28.563	18.769		47.267	48.959
	15.307	25.996		49.803	58.077
	9.859	38.789		48.25	55.131
	12.305	57.918		53.564	38.453
	23.33	55.332		48.127	27.264
	41.023	19.575		53.491	77.958
	30.415	44.248			69.013
	44.472	58.936
	29.629	49.31
	16.277	48.03
	34.184	63
	37.626	56.809
	29.315	19.875
	22.581	50.269
	38.032	21.039
	5.164	15.251
	23.691	24.764
	29.931	34.199
	38.293	10.484
	28.519	23.696
	28.68	31.772
	22.858	61.921
	43.322	47.681
	25.962	32.118
	39.218	28.766
	26.495	42.333
	12.938	52.949
	32.748	43.181
	19.256	47.9
	19.058	17.448
	27.879	57.808
	19.634	15.278
	16.739	24.742
	3.964	55.048
	10.642	48.491
	9.373	58.133
	7.384	50.425
	9.605	57.795
	17.858	25.149
	10.535	60.925
	33.212	40.308
	35.654	44.309
	10.307	26.785
	3.632	23.065
	17.107	35.275
	13.006	10.134
	9.147	35.75
	20.946	52.192
	17.51	12.343
	10.91	54.852
	15.944	54.212
	26.507	42.681
	8.955	62.26
	16.106	48.232
	56.182	59.745
	21.819	65.361
	18.479	21.889
	20.882	31.654
	29.692	16.816
	7.664	45.461
	28.217	56.32
	10.348	52.582
	9.438	43.218
	9.027	39.097
	10	14.564
	11.579	50.525
	26.365	11.933
	30.781	39.781
	14.382	35.104
	12.08	10.5
	18.419	39.834
	19.147	28.201
	22.696	24.684
	12.066	37.407
	12.806
	12.295
	11.426
	12.689
	9.59
	54.781
	46.659
	43.473
	39.273
	3.713
	40.574
	52.194

## Sheet: Statistical analysis
Statistical analysis
Šídák's multiple comparisons test	Mean Diff.	95.00% CI of diff.	Below threshold?	Summary	Adjusted P Value
N2 CON P0 vs. N2 PDStv P0	17.09	13.72 to 20.46	Yes	****	<0.0001
N2 CON F1 vs. N2 PDStv F1	-6.677	-10.10 to -3.255	Yes	****	<0.0001
N2 CON F2 vs. N2 PDStv F2	2.083	-1.392 to 5.557	No	ns	0.6018
hrde-1(tm1200) CON P0 vs. hrde-1(tm1200) PDStv P0	23.53	16.78 to 30.29	Yes	****	<0.0001
hrde-1(tm1200) CON F1 vs. hrde-1(tm1200) PDStv F1	0.03748	-6.213 to 6.288	No	ns	>0.9999
hrde-1(tm1200) CON F2 vs. hrde-1(tm1200) PDStv F2	4.324	-1.488 to 10.14	No	ns	0.3049
prg-1(tm872) CON P0 vs. prg­1(tm872) PDStv P0	16.5	10.73 to 22.27	Yes	****	<0.0001
prg-1(tm872) CON F1 vs. prg-1(tm872) PDStv F1	-15.67	-22.13 to -9.212	Yes	****	<0.0001
prg-1(tm872) CON F2 vs. prg-1(tm872) PDStv F2	-9.114	-15.75 to -2.479	Yes	**	0.0013
N2 CON P0 vs. hrde-1(tm1200) CON P0	-4.745	-8.375 to -1.114	Yes	**	0.0069
N2 CON P0 vs. prg-1(tm872) CON P0	-15.18	-18.95 to -11.41	Yes	****	<0.0001
N2 CON P0 vs. N2 CON F1	-8.131	-11.35 to -4.908	Yes	****	<0.0001
N2 CON P0 vs. N2 CON F2	-11.8	-15.13 to -8.468	Yes	****	<0.0001
hrde-1(tm1200) CON P0 vs. hrde-1(tm1200) CON F1	2.302	-2.942 to 7.545	No	ns	0.8191
hrde-1(tm1200) CON P0 vs. hrde-1(tm1200) CON F2	-4.711	-9.913 to 0.4916	No	ns	0.0988
prg-1(tm872) CON P0 vs. prg-1(tm872) CON F1	10.58	4.564 to 16.59	Yes	****	<0.0001
prg-1(tm872) CON P0 vs. prg-1(tm872) CON F2	0.3559	-5.657 to 6.369	No	ns	>0.9999
N2 PDStv P0 vs. N2 PDStv F1	-31.9	-35.14 to -28.66	Yes	****	<0.0001
N2 PDStv P0 vs. N2 PDStv F2	-26.81	-29.99 to -23.63	Yes	****	<0.0001
hrde-1(tm1200) PDStv P0 vs. hrde-1(tm1200) PDStv F1	-21.2	-28.21 to -14.18	Yes	****	<0.0001
hrde-1(tm1200) PDStv P0 vs. hrde-1(tm1200) PDStv F2	-23.92	-30.62 to -17.23	Yes	****	<0.0001
prg­1(tm872) PDStv P0 vs. prg-1(tm872) PDStv F1	-21.59	-27.23 to -15.96	Yes	****	<0.0001
prg­1(tm872) PDStv P0 vs. prg-1(tm872) PDStv F2	-25.26	-31.08 to -19.44	Yes	****	<0.0001
