# Supplementary material for: エンドトキシン吸着療法(PMX) (特集 間質性肺炎治療法の新展開)
Source: eLife journal article supplement (doi:10.7554/elife.61459), 2010-04-01
Supplement: supp [file elife-61459-supp-v1.zip › elife_poa_e61459_Figure_7_figure_supplement_2_source_data_1.xlsx]

## Sheet: Data
Figure 7-figure supplement 1-Source Data 1: DAF-36 and TCER-1 are required for the delay in the onset of germline proliferation in postdauer animals.
Mitotic cell rows									Meiotic cell rows
N2 CON	N2 PDstv	daf-36(k114) CON	daf-36(k114) PDstv	nhr-49(nr2041) CON	nhr-49(nr2041) PDstv	tcer-1(tm1452) CON	tcer-1(tm1452) PDstv		N2 CON	N2 PDstv	daf-36(k114) CON	daf-36(k114) PDstv	nhr-49(nr2041) CON	nhr-49(nr2041) PDstv	tcer-1(tm1452) CON	tcer-1(tm1452) PDstv
15	11	9	15	14	13	12	14		9	8	12	6	6	7	13	7
11	13	14	17	13	10	13	15		11	8	7	4	10	9	12	7
13	14	12	15	18	17	14	11		16	5	8	7	6	6	10	5
13	14	10	17	16	15	17	15		9	8	11	5	5	10	9	9
14	14	13	12	8	14	13	12		11	6	10	6	14	6	14	11
17	9	14	15	17	16	13	17		8	11	8	7	10	7	9	5
14	14	15	13	10	21	13	15		10	7	6	10	13	0	7	6
12	15	15	12	11	19	14	17		8	7	7	12	5	7	6	7
13	15	14	15	12	13	15	10		12	4	8	9	11	5	9	7
18	11	15	11	16	14	14	18		11	10	8	8	0	11	8	7
15	13	13	16	19	18	13	14		11	8	9	4	3	3	10	8
14	15	14	17	19	17	14	16		12	5	5	7	7	3	8	7
13	14	15	18	9	18	13	15		11	4	9	7	11	0	14	6
18	14	15	14	17	16	14	15		10	7	5	7	4	0	9	8
15	15	13	12	14	16	15	15		7	3	8	8	4	5	12	12
14	16	13	13	15	13	15	19		10	3	12	8	6	8	9	6
17	15	13	12	14	18	17	14		13	5	10	10	6	4	9	9
12	17	13	18	22	16	14	17		10	2	10	7	4	8	16	10
14	11	15	17	19	15	19	20		8	6	5	7	0	4	8	1
14	14	15	17	19	16	12	14		5	5	10	6	1	4	13	7
17	11	17	15	13	14	14	16		2	3	5	6	11	6	12	9
15	15	21	15	17	11	12	14		8	3	4	8	10	11	6	10
18	15	16	11	11	14	16	14		9	4	7	8	15	10	11	12
15	15	15	13	13	12	13	15		9	6	4	5	9	13	12	10
13	17	14	16	12	16	14	16		13	7	12	5	8	6	6	10
16	15	14	17	13	18	15	15		5	10	7	9	8	2	10	8
14	11	16	20	10	14	18	13		11	6	5	5	8	7	8	7
14	15	14	19	11	18	12	13		8	11	6	6	7	0	6	10
15	16	16	15	14	14	13	14		7	5	10	6	7	8	11	7
14	16	17	15	18	20	16	14		16	5	3	3	6	0	6	11
12	16	13	15	16	18	16	14		11	6	7	7	6	7	14	12
15	14	13	18	13	18	12	15		11	4	11	8	8	0	11	8
15	15	13	15	15	12	14	16		10	3	12	9	5	9	0	3
13	15	14	16	19	17	16	16		8	8	10	6	5	3	11	4
14	14	20	15	14	11	13	15		11	7	4	10	14	9	4	3
13	15	15	17	18	13	15	11		11	6	12	6	8	6	7	16
15	16	13	17	14	11	13	15		11	14	12	7	4	7	8	5
11	13	18	15	17	12	16	15		13	10	10	10	4	5	2	10
15	14	15	15	14	13	14	16		5	5	4	3	8	7	3	7
16	14	13	16	15	16	16	13		8	8	7	6	6	2	0	7
13	14	12	14	18	13	16	10		9	6	6	5	11	4	9	14
14	13	17	20	13	16	13	16		10	7	4	0	16	2	5	5
13	15	18	14	15	18	13	12		10	9	2	8	6	2	16	11
15	12	14	15	15	14	17	16		6	10	10	11	5	3	7	3
14	14	17	14	13	13	11	15		7	7	8	16	10	8	10	3
15	13	14	15	18	15	14	14		6	7	12	5	4	4	9	7
15	14	17	18	13	13	11	14		7	9	6	9	6	6	8	5
15	14	18	17	13	15	13	17		12	7	0	8	9	3	7	3
15	15	20	17	15	10	15	15		9	10	0	6	7	9	9	9
17	17	16	17	18	15	13	14		5	5	8	4	7	4	13	7
15	16	16	14	16	15	11	17		8	3	9	7	9	10	14	12
16	16	15	13	15	12	16	15		2	8	4	6	10	7	7	9
16	9	16	19	16	10	14	18		6	12	7	5	10	11	11	0
18	16	17	12	18	17	13	14		4	6	3	7	12	5	15	9
18	14	16	17	22	13	14	14		7	4	6	6	5	7	9	3
17	12	14	14	12	10	13	16		9	6	5	7	12	7	3	5
13	17	25	16	17	16	19	15		7	4	9	5	3	0	3	9
16	12	20	13	17	12	12	16		7	10	9	8	0	5	12	9
19	14	16	16	16	17	13	16		13	4	3	6	3	7	9	6
16	14	16	18	20	12	14	14		11	14	9	6	3	5	6	10
16	14	18	14	11	13.4	16	11		14	6	9	5	8	4.8	1	12
15	12	14	15	14		9	15		11	5	12	5	0		10	5
14	14	17	17	13		9	14		6	6	5	9	10		12	7
15	15	17		18		13	15		14	7	6		0		6	3
14	17	18		20		15	15		8	8	9		1		7	8
14	15	19		14		14	12		8	6	5		5		5	5
13	14	17		14		16	14		7	8	7		6		10	0
14	14	18		13		14	11		11	7	7		0		10	10
12	13	15		17		12	15		9	8	9		4		10	11
15	14	17		14		13	14		12	4	9		5		3	9
13	13	11		14		12	17		11	9	8		5		10	0
17	15	14				12	15		8	7	6				12	6
13	14	14				10	18		9	10	8				12	0
17	14	16				11	13		5	16	5				6	10
18	14	14				14	15		11	11	7				8	11
15	14	16				14	14		9	6	6				3	9
15	9	14				13	12		10	12	8				9	9
13	14	18				14	17		8	7	5				4	8
13		16				7	16		9		7				13	11
16		17				13	15		11		10				11	12
13		13				13	16		11		4				7	6
13		15				15	11		11		9				5	11
16		17				12	13		8		7				16	4
15		16				13	13		8		11				11	12
13		21				16	14		13		6				8	9
14		15				16	14		9		7				12	8
11		18				17	16		6		7				4	11
17		14				17	14		12		8				9	9
		15				15	16				4				4	5
		16				17	15				9				8	6
		17				14					8				7
						14									9
						13									9
						16									3

## Sheet: Statistical analysis
Statistical analysis
Mitotic cell rows
Unpaired t test	N2 PDStv vs. N2 CON	daf-36(k114) PDStv vs. daf-36(k114) CON	nhr-49(nr2041) PDStv vs. nhr-49(nr2041) CON	tcer-1(tm1452) PDStv vs. tcer-1(tm1452) CON
P value	0.0283	0.8426	0.4307	0.0077
P value summary	*	ns	ns	**
Significantly different (P < 0.05)?	Yes	No	No	Yes
One- or two-tailed P value?	Two-tailed	Two-tailed	Two-tailed	Two-tailed
t, df	t=2.213, df=164	t=0.1989, df=152	t=0.7904, df=130	t=2.695, df=182
Meiotic cell rows
Unpaired t test	N2 PDStv vs. N2 CON	daf-36(k114) PDStv vs. daf-36(k114) CON	nhr-49(nr2041) PDStv vs. nhr-49(nr2041) CON	tcer-1(tm1452) PDStv vs. tcer-1(tm1452) CON
P value	<0.0001	0.2561	0.0678	0.0397
P value summary	****	ns	ns	*
Significantly different (P < 0.05)?	Yes	No	No	Yes
One- or two-tailed P value?	Two-tailed	Two-tailed	Two-tailed	Two-tailed
t, df	t=5.274, df=164	t=1.140, df=152	t=1.842, df=130	t=2.072, df=182
