# Supplementary material for: エンドトキシン吸着療法(PMX) (特集 間質性肺炎治療法の新展開)
Source: eLife journal article supplement (doi:10.7554/elife.61459), 2010-04-01
Supplement: supp [file elife-61459-supp-v1.zip › elife_poa_e61459_Figure_7_source_data_1.xlsx]

## Sheet: Data
Figure 7-Source Data 1: Total germ cell rows in CON and PDStv wild-type N2 and mutant larva.
Total germ cell rows
N2 CON	N2 PDstv	daf-36(k114) CON	daf-36(k114) PDstv	nhr-49(nr2041) CON	nhr-49(nr2041) PDstv	tcer-1(tm1452) CON	tcer-1(tm1452) PDstv
24	19	21	21	20	20	25	21
22	21	21	21	23	19	25	22
29	19	20	22	24	23	24	16
22	22	21	22	21	25	26	24
25	20	23	18	22	20	27	23
25	20	22	22	27	23	22	22
24	21	21	23	23	21	20	21
20	22	22	24	16	26	20	24
25	19	22	24	23	18	24	17
29	21	23	19	16	25	22	25
26	21	22	20	22	21	23	22
26	20	19	24	26	20	22	23
24	18	24	25	20	18	27	21
28	21	20	21	21	16	23	23
22	18	21	20	18	21	27	27
24	19	25	21	21	21	24	25
30	20	23	22	20	22	26	23
22	19	23	25	26	24	30	27
22	17	20	24	19	19	27	21
19	19	25	23	20	20	25	21
19	14	22	21	24	20	26	25
23	18	25	23	27	22	18	24
27	19	23	19	26	24	27	26
24	21	19	18	22	25	25	25
26	24	26	21	20	22	20	26
21	25	21	26	21	20	25	23
25	17	21	25	18	21	26	20
22	26	20	25	18	18	18	23
22	21	26	21	21	22	24	21
30	21	20	18	24	20	22	25
23	22	20	22	22	25	30	26
26	18	24	26	21	18	23	23
25	18	25	24	20	21	14	19
21	23	24	22	24	20	27	20
25	21	24	25	28	20	17	18
24	21	27	23	26	19	22	27
26	30	25	24	18	18	21	20
24	23	28	25	21	17	18	25
20	19	19	18	22	20	17	23
24	22	20	22	21	18	16	20
22	20	18	19	29	17	25	24
24	20	21	20	29	18	18	21
23	24	20	22	21	20	29	23
21	22	24	26	20	17	24	19
21	21	25	30	23	21	21	18
21	20	26	20	22	19	23	21
22	23	23	27	19	19	19	19
27	21	18	25	22	18	20	20
24	25	20	23	22	19	24	24
22	22	24	21	25	19	26	21
23	19	25	21	25	25	25	29
18	24	19	19	25	19	23	24
22	21	23	24	26	21	25	18
22	22	20	19	30	22	28	23
25	18	22	23	27	20	23	17
26	18	19	21	24	17	16	21
20	21	34	21	20	16	22	24
23	22	29	21	17	17	24	25
32	18	19	22	19	24	22	22
27	28	25	24	23	17	20	24
30	20	27	19	19	18.2	17	23
26	17	26	20	14		19	20
20	20	22	26	23		21	21
29	22	23		18		19	18
22	25	27		21		22	23
22	21	24		19		19	17
20	22	24		20		26	14
25	21	25		13		24	21
21	21	24		21		22	26
27	18	26		19		16	23
24	22	19		19		22	17
25	22	20				24	21
22	24	22				22	18
22	30	21				17	23
29	25	21				22	26
24	20	22				17	23
25	21	22				22	21
21	21	23				18	25
22		23				20	27
27		27				24	27
24		17				20	22
24		24				20	22
24		24				28	17
23		27				24	25
26		27				24	23
23		22				28	22
17		25				21	27
29		22				26	23
		19				19	21
		25				25	21
		25				21
						23
						22
						19

## Sheet: Statistical analysis
Statistical analysis
Šídák's multiple comparisons test	Mean Diff.	95.00% CI of diff.	Below threshold?	Summary	Adjusted P Value
N2 CON vs. N2 PDStv	2.872	1.712 to 4.032	Yes	****	<0.0001
daf-36(k114) CON vs. daf-36(k114) PDStv	0.5592	-0.6632 to 1.782	No	ns	0.6896
nhr-49(nr2041) CON vs. nhr-49(nr2041) PDStv	1.525	0.2234 to 2.828	Yes	*	0.0141
tcer-1(tm1452) CON vs. tcer-1(tm1452) PDStv	0.2667	-0.8333 to 1.367	No	ns	0.9571
N2 CON vs. daf-36(k114) CON	1.085	0.01584 to 2.153	Yes	*	0.0455
N2 CON vs. nhr-49(nr2041) CON	2.123	0.9828 to 3.263	Yes	****	<0.0001
N2 CON vs. tcer-1(tm1452) CON	1.398	0.3374 to 2.458	Yes	**	0.005
N2 PDStv vs. daf-36(k114) PDStv	-1.228	-2.439 to -0.01749	Yes	*	0.0456
N2 PDStv vs. nhr-49(nr2041) PDStv	0.7765	-0.4453 to 1.998	No	ns	0.3384
N2 PDStv vs. tcer-1(tm1452) PDStv	-1.208	-2.313 to -0.1019	Yes	*	0.0272
