# Supplementary material for: エンドトキシン吸着療法(PMX) (特集 間質性肺炎治療法の新展開)
Source: eLife journal article supplement (doi:10.7554/elife.61459), 2010-04-01
Supplement: supp [file elife-61459-supp-v1.zip › elife_poa_e61459_Supplementary_file_1.xlsx]

## Sheet: Sheet
Supplemental File 1: Gene expression changes of selected genes in N2 PDStv compared to N2 CON adults (Ow et al. 2018 PLoS Genet 14: e1007219)
Insulin/IGF-1 signaling	Fold change	P-value	FDR p-value correction
kri-1	2.7	0.39	1
daf-18	-2.81	6.6e-06	0.000572
ftt-2	1.78	0.005	0.11
phi-62	1.59	0.04	0.51
tcer-1	-1.63	0.04	0.48
daf-16	-1.28	0.41	1
smk-1	-2.09	0.00318	0.08
pqm-1	2.97	0.000114	0.00575
Steroid hormone signaling	Fold change	P-value	FDR p-value correction
daf-9	1.56	1	1
daf-36	2.98	0.000325	0.01
daf-12	1.71	0.31	1
dhs-16	-1.28	1	1
hsd-1	1.31	1	1
nhr-8	2.46	0.00782	0.15
nhr-13	-1.12	0.87	1
nhr-66	-1.86	0.03	0.41
Fatty acid metabolism	Fold change	P-value	FDR p-value correction
nhr-80	2.95	0.0088	0.16
nhr-49	-1.24	0.42	1
fat-5	26.66	6.68e-21	3.9e-17
fat-6	4.08	6.87e-10	2.24e-07
fat-7	5.08	6.17e-07	7.54e-05
sbp-1	2.39	0.00431	0.1
mdt-15	-1.3	0.32	1
fat-2	3.82	9.41e-11	4.19e-08
TOR signaling	Fold change	P-value	FDR p-value correction
pha-4	-1.03	1	1
let-363	-2.05	0.01	0.24
daf-15	-2.01	0.02	0.25
rict-1	-1.83	0.07	0.7
raga-1	-1.03	0.93	1
rheb-1	-1.43	0.17	1
