# Supplementary material for: エンドトキシン吸着療法(PMX) (特集 間質性肺炎治療法の新展開)
Source: eLife journal article supplement (doi:10.7554/elife.61459), 2010-04-01
Supplement: supp [file elife-61459-supp-v1.zip › elife_poa_e61459_Supplementary_file_2.xlsx]

## Sheet: Sheet1
Supplemental File 2. Strains used in this study.
N2	Bristol wild-type
AA82	daf-12(rh284) X
AA85	daf-12(rh285) X
AA292	daf-36(k114) V
AA1052	dhs-16(tm1890) V
AE501	nhr-8(ok186) IV
BS1080	gld-1::gfp::3xflag
BX26	fat-2(wa17) IV
BX106	fat-6(tm331) IV
BX107	fat-5(tm420) V
BX110	fat-6(tm331) IV; fat-5(tm420) V
BX153	fat-7(wa36) V
BX156	fat-6(tm331) IV; fat-7(wa36) V
BX160	fat-7(wa36) fat-5(tm420) V
CB1375	daf-18(e1375) IV
CE541	sbp-1(ep79) III
CF1139	daf-16(mu86) I; muIs61 [(pKL78) daf16::gfp + rol-6(su1006)]
CF2052	kri-1(ok1251) I
CF2167	tcer-1(tm1452) II
EG6699	ttTi5605 II; unc-119(ed3) III; oxEx1578 [eft-3p::gfp + Cbr-unc-119]
GR2063	hsd-1(mg433) I
RG1228	daf-9(rh50) X
SEH301	nhr-13(gk796) V
SEH302	nhr-49(nr2041) I; nhr-80(tm1011) III
SEH303	nhr-49(nr2041) I; nhr-13(gk796) V
SEH304	nhr-49(nr2041) I; nhr-80(tm1011) III; nhr-13(gk796) V
SEH312	daf-16(mu86) I; muEx158 (daf-16AM::gfp + sur-5p::gfp)
SEH319	nhr-49(et8) I
SEH326	nhr-49(et13) I
SEH327	nhr-49(et7) I
SEH342	nhr-49(nr2041) I; nhr-66(ok940) IV
SEH343	nhr-49(gk405) I
SEH344	nhr-49(ok2165) I
SEH350	pqm-1(ok485) II
SEH351	kri-1(ok1251) I; daf-12(rh284) X
SEH352	kri-1(ok1251) I; daf-12(rh285) X
SEH353	tcer-1(tm1452) II; daf-12(rh284) X
SEH354	tcer-1(tm1452) II; daf-12(rh285) X
SEH357	glp-4(bn2) I; pdrSi1 [Pglp-4::glp-4 cDNA::gfp::glp-4 3'UTR; unc-119(+)] II
SEH368	glp-4(bn2) I; pdrSi2 [Pnhx-2::glp-4 cDNA::gfp::glp-4 3'UTR; unc-119(+)] II
SEH369	glp-4(bn2) I; pdrSi3 [Pzfp-2::glp-4 cDNA::gfp::glp-4 3'UTR; unc-119(+)] II
SEH370	glp-4(bn2) I; pdrSi4 [Ppgl-1::glp-4 cDNA::gfp::glp-4 3'UTR; unc-119(+)] II
SEH383	hrde-1(tm1200) III
SS104	glp-4(bn2) I
SP488	smk-1(mn156) V
STE68	nhr-49(nr2041) I
STE69	nhr-66(ok940) IV
STE70	nhr-80(tm1011) III
STE73	nhr-80(tm1011) III; nhr-13(gk796) V
TJ356	zIs356 [daf-16p::daf-16a/b::gfp + rol-6(su1006)]
WM161	prg-1(tm872) II
XA7702	mdt-15(tm2182) III
