# Supplementary material for: エンドトキシン吸着療法(PMX) (特集 間質性肺炎治療法の新展開)
Source: eLife journal article supplement (doi:10.7554/elife.61459), 2010-04-01
Supplement: supp [file elife-61459-supp-v1.zip › elife_poa_e61459_Supplementary_file_3.xlsx]

## Sheet: Sheet
Supplemental File 3. Primers sequences used in this study.
MO2454	5’ cactctcagtacaatctgctctgatgccgc 3’
MO2455	5’ aagcttggcgtaatcatggtcatagctgtt 3’
MO2516	5’ gcggcatcagagcagattgtactgagagtggattcgcaggagtaatcgtctcgttggcag 3’
MO2507	5’ gcggcatcagagcagattgtactgagagtgaaattgaaatagcataaacattcacgtgtg 3’
MO2508	5’ aattcaaaagcgacaatgtcggaccccgcaggaaaccgtccgaag 3’
MO2468	5’ actcattttttctacgttgagagccttgagttgtgcaatcgccgc 3’
MO2469	5’ ctcaaggctctcaacgtagaaaaaatgagtaaaggagaagaacttttc 3’
MO2470	5’ tgaaaaacgtgtgaatatctatttgtatagttcatccatgccatgtgtaatc 3’
MO2471	5’ gaactatacaaatagatattcacacgtttttcatgtttttttgttttg 3’
MO2472	5’ aacagctatgaccatgattacgccaagcttagtttttttttcaaaaaaagttccaaaatttttg 3’
MO2499	5’ ataagtgcaagtaagatcagtgtttgtttcgatatcagtctgtttcgtaacg 3’
MO2500	5’ cctagttctagacattctctaatgaaaaaatctttcagttgaaattgaaaatgagttaaagttggag 3’
MO2514	5’ gaaacaaacactgatcttacttgcacttatgattcgcaggagtaatcgtctcgttggcag 3’
MO2504	5’ agattttttcattagagaatgtctagaactaggagtttttttttcaaaaaaagttccaaaatttttg 3’
vit-1 Fw	5’gaggttcgctttgacggata 3’ (Ding and Grosshans, 2009).
vit-1 Rev	5’ ggcttcacattcctcgttct 3’ (Ding and Grosshans, 2009).
vit-2 Fw	5’ gacaccgagctcatccgccca 3’ (DePina et al. 2011).
vit-2 Rev	5’ ttccttctctccattgacct 3’ (DePina et al. 2011).
vit-3/4/5 Fw	5’ catgtgcaccatcgaagaactc 3’ (Dowen et al. 2016).
vit-3/4/5 Rev	5’ ccaatgtggtttcaatgacaagttg 3’ (Dowen et al. 2016).
vit-6 Fw	5’ ttcacccagaagccagttc 3’ (Dowen et al. 2016).
vit-6 Rev	5’ aggatgggaggcagtagac 3’ (Dowen et al. 2016).
act-1_v Fw	5’ gctggacgtgatcttactgattacc 3’ (Hoogewijs et al. 2008).
act-1_v Rev	5’ gtagcagagcttctccttgatgtc 3’ (Hoogewijs et al. 2008).
