# Supplementary figures and images for: エンドトキシン吸着療法(PMX) (特集 間質性肺炎治療法の新展開)
Source: eLife journal article supplement (doi:10.7554/elife.61459), 2010-04-01

A

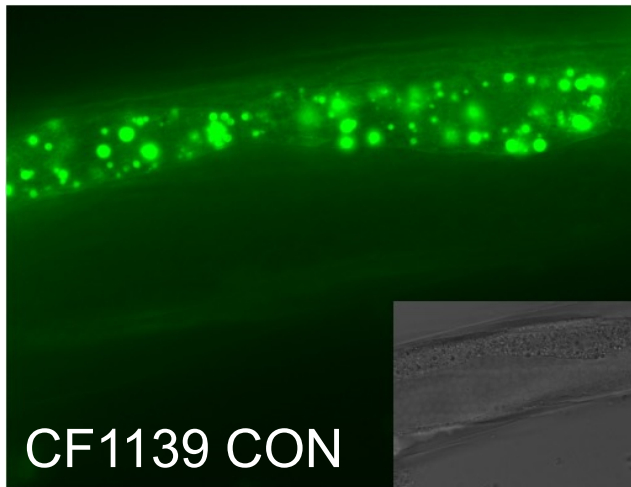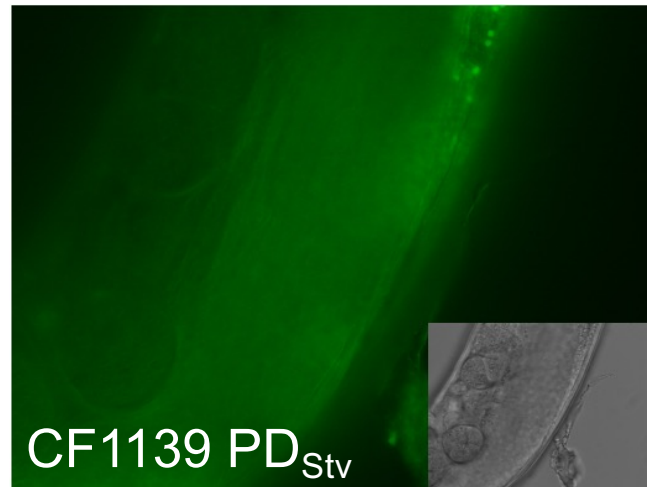

B

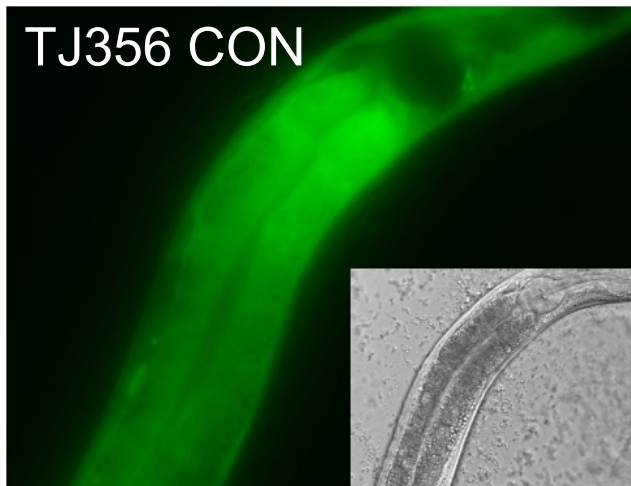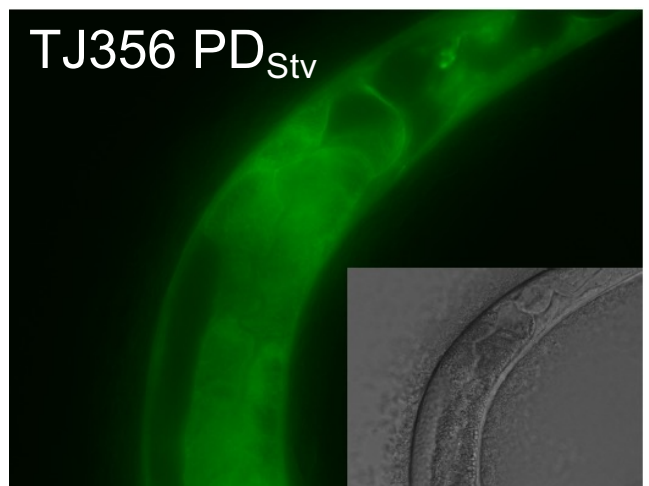

Supplement: supp [file elife-61459-supp-v1.zip]

Figure 5-figure supplement 2

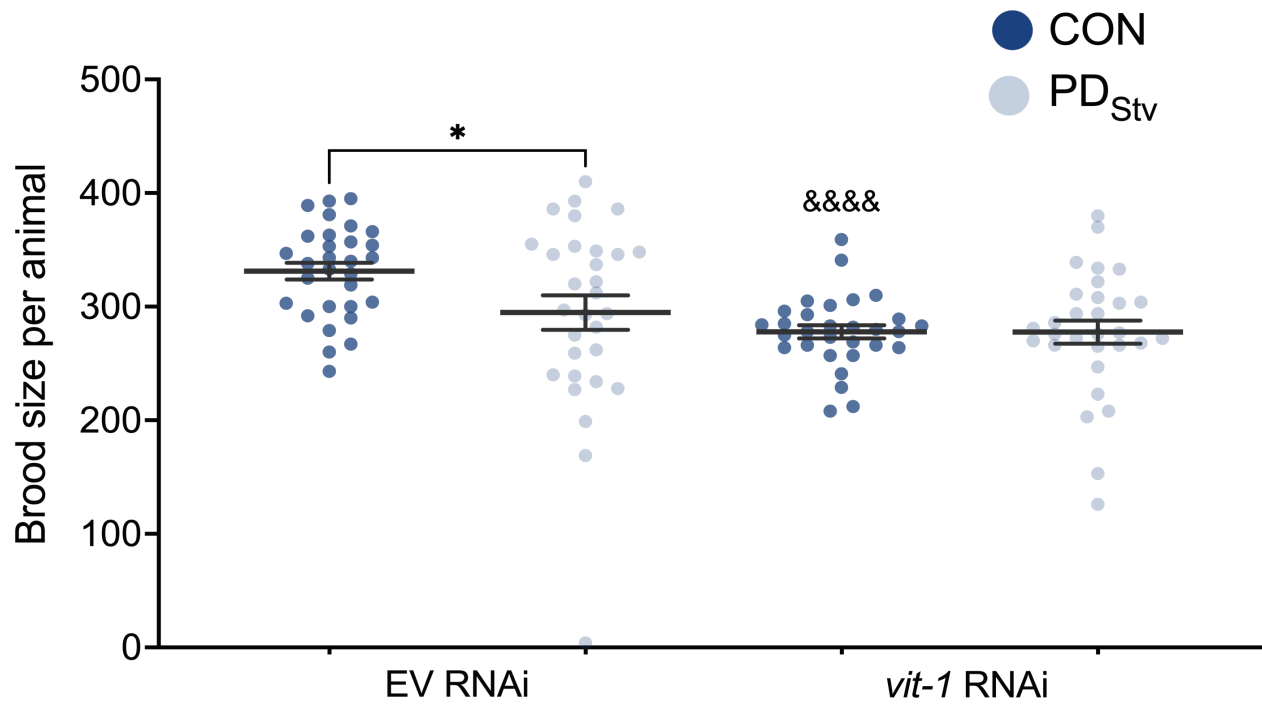

Supplement: supp [file elife-61459-supp-v1.zip]

## Appendix 1-figure 2

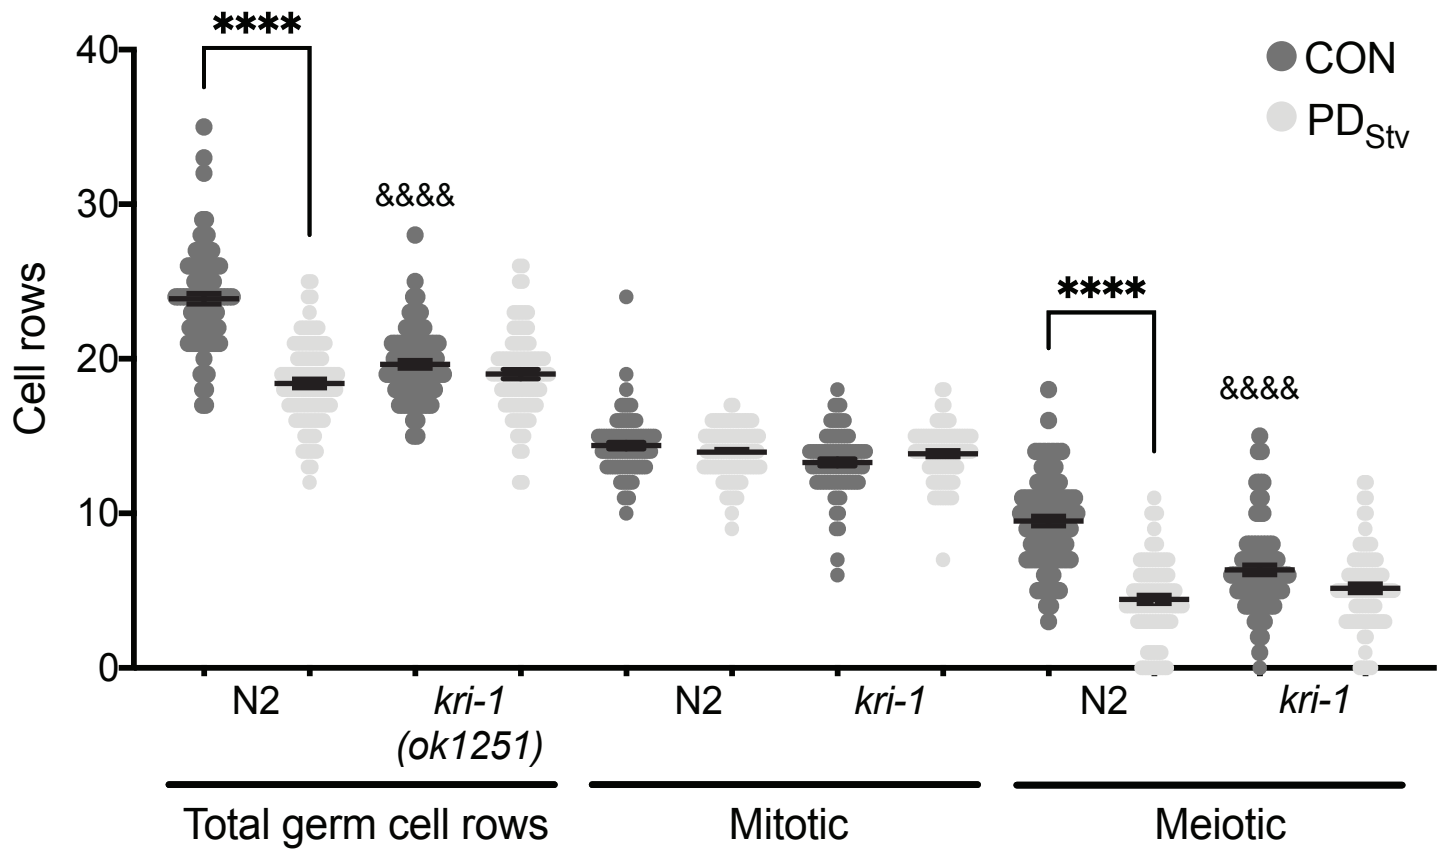

Supplement: supp [file elife-61459-supp-v1.zip]

## Appendix 1-figure 1

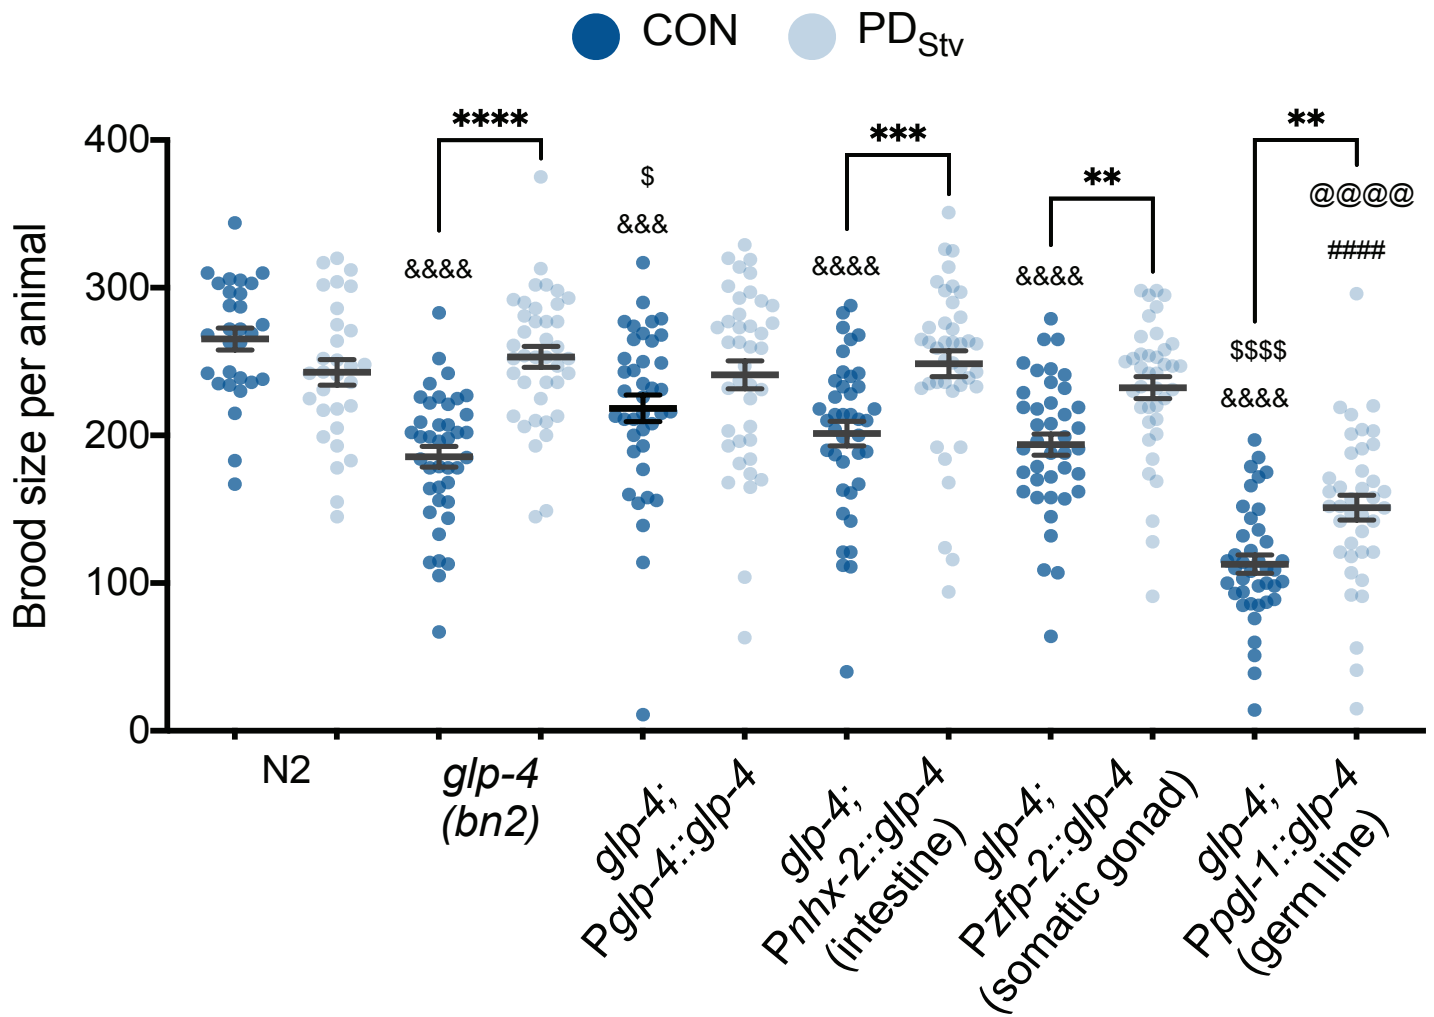

Supplement: supp [file elife-61459-supp-v1.zip]

## Figure 4-figure supplement 1

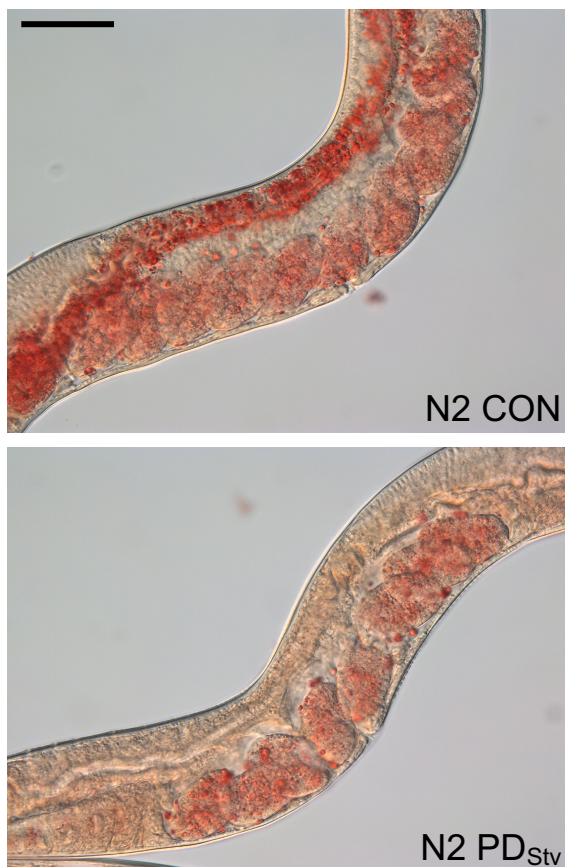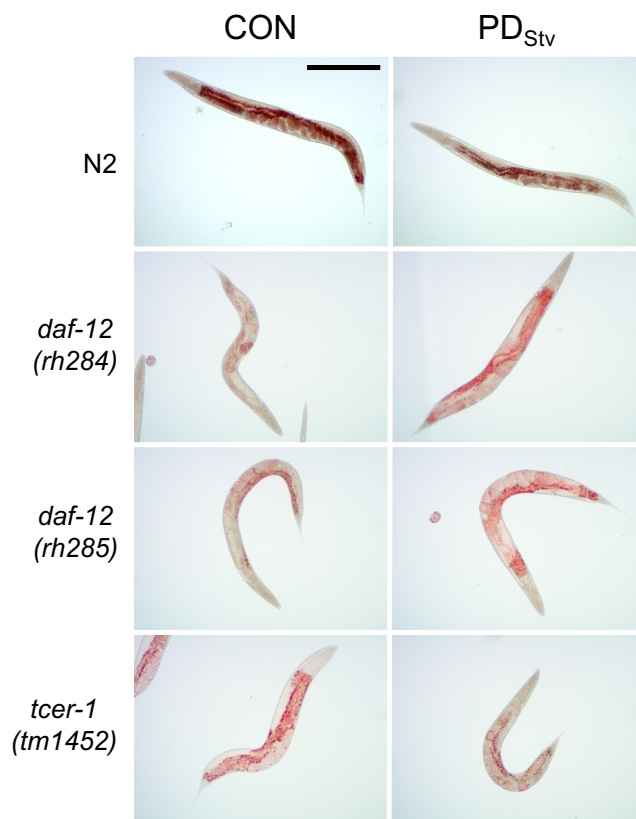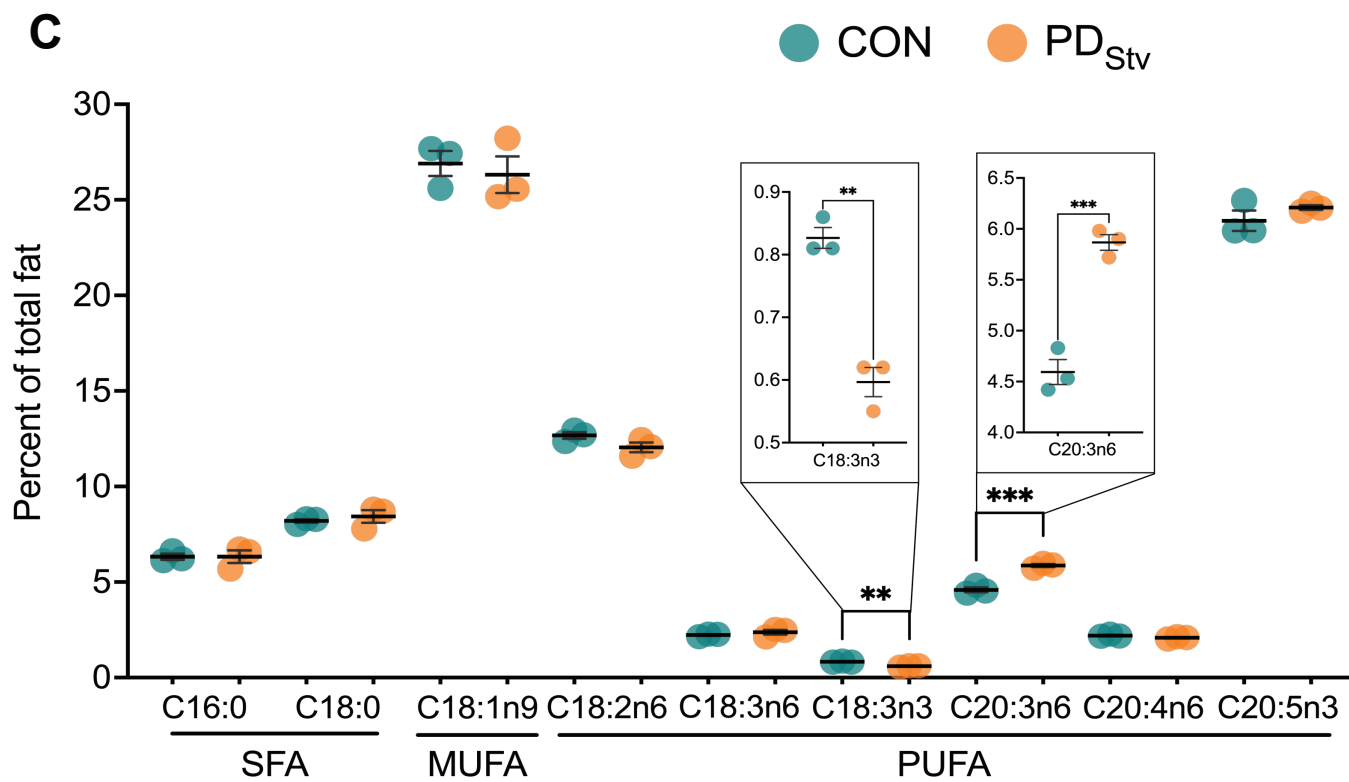

Supplement: supp [file elife-61459-supp-v1.zip]

Figure 5-figure supplement 1

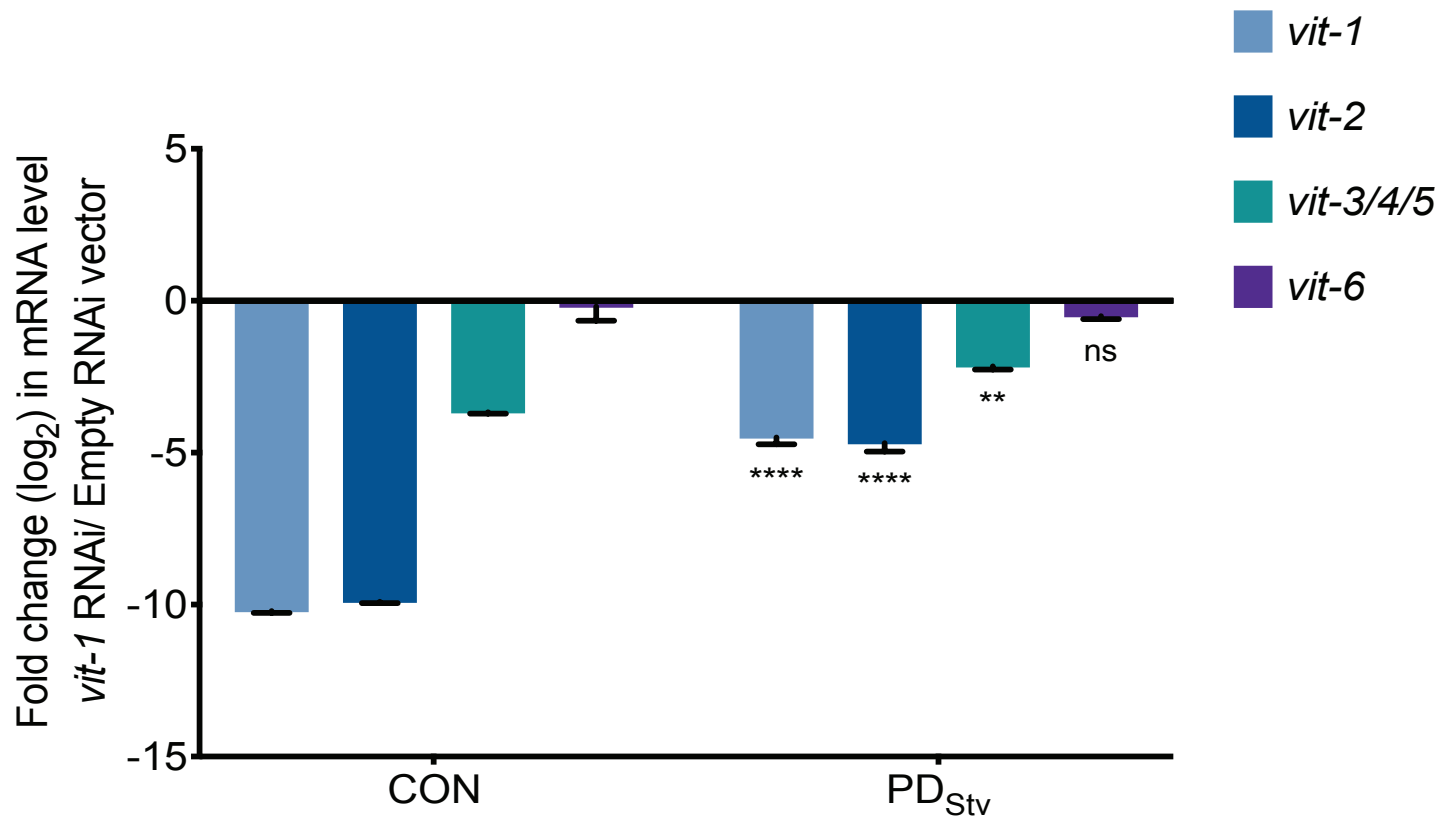

Supplement: supp [file elife-61459-supp-v1.zip]

Figure 7- figure supplement 2

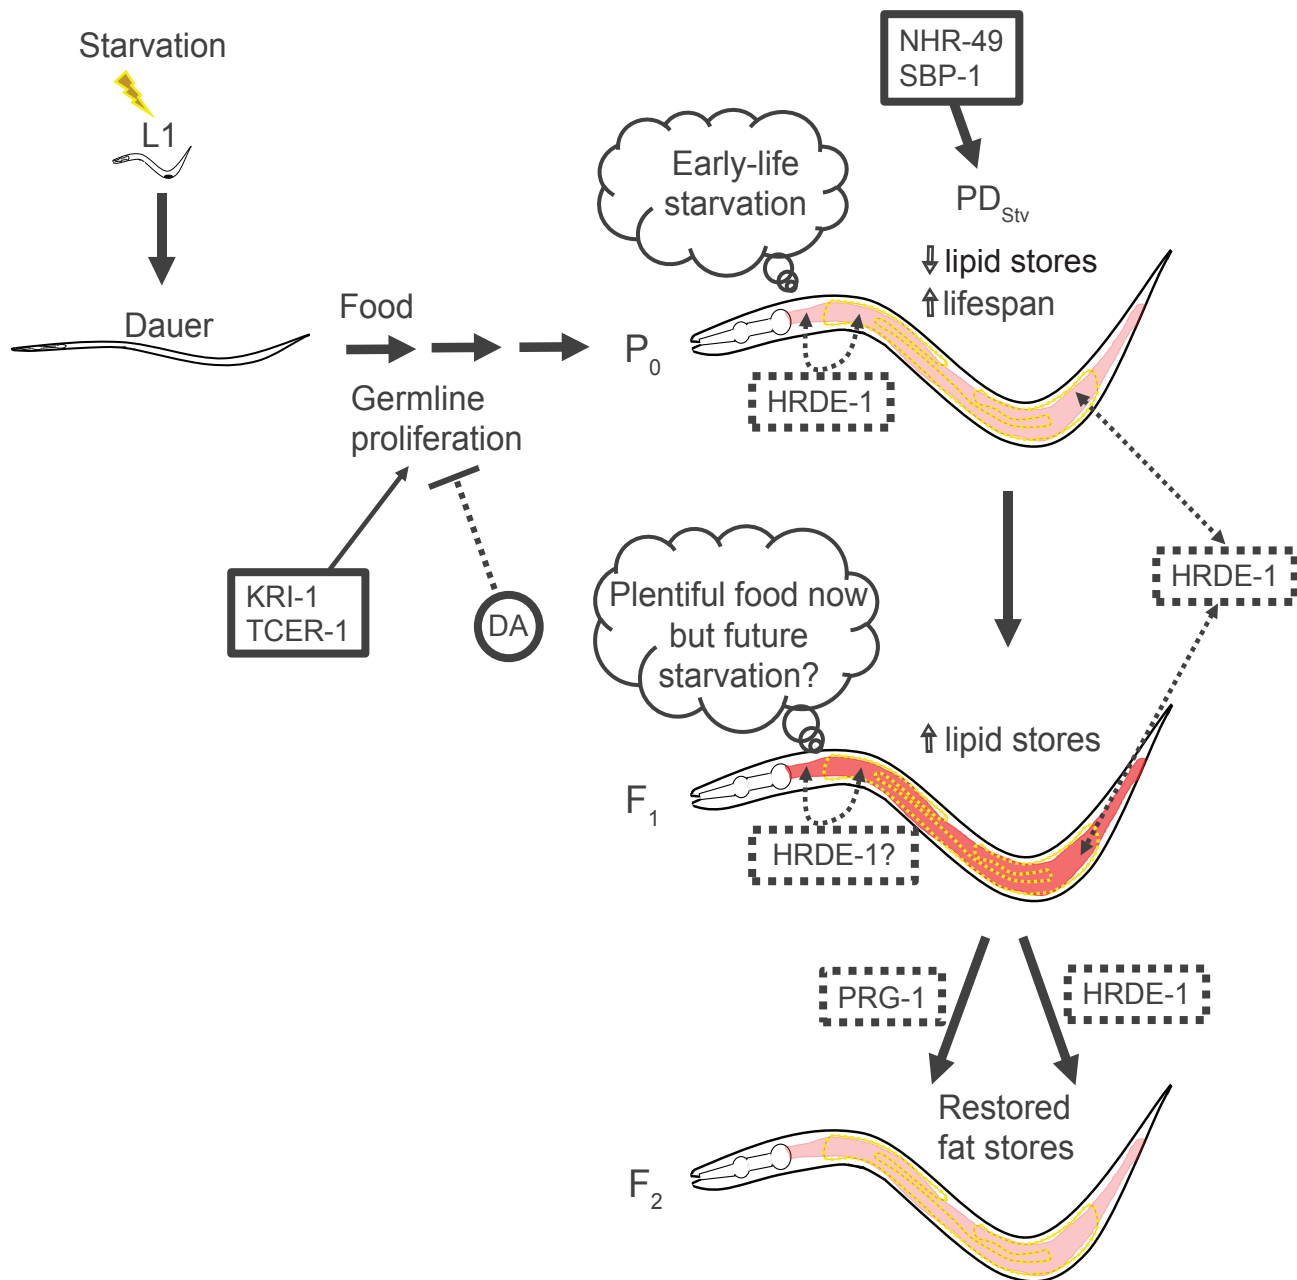

Supplement: supp [file elife-61459-supp-v1.zip]

A

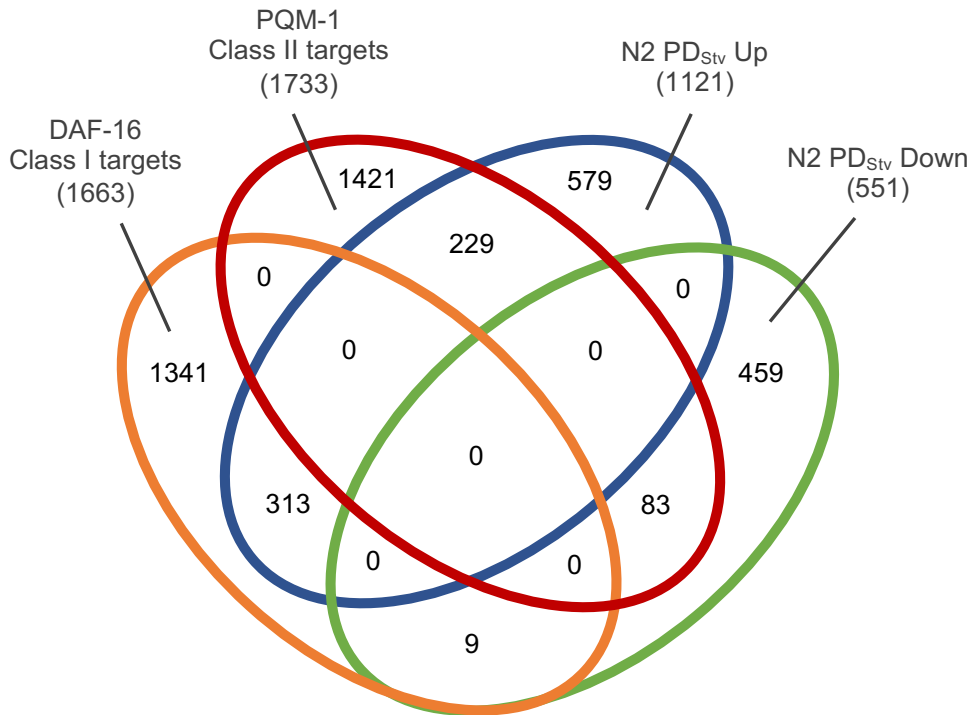

B

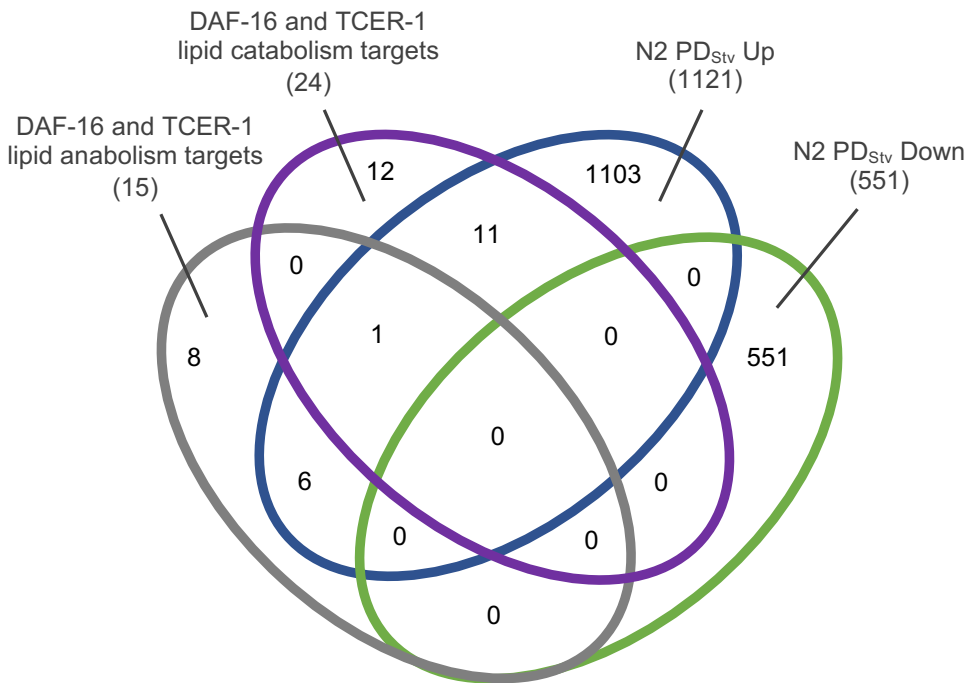

Supplement: supp [file elife-61459-supp-v1.zip]

Figure 1- figure supplement 1

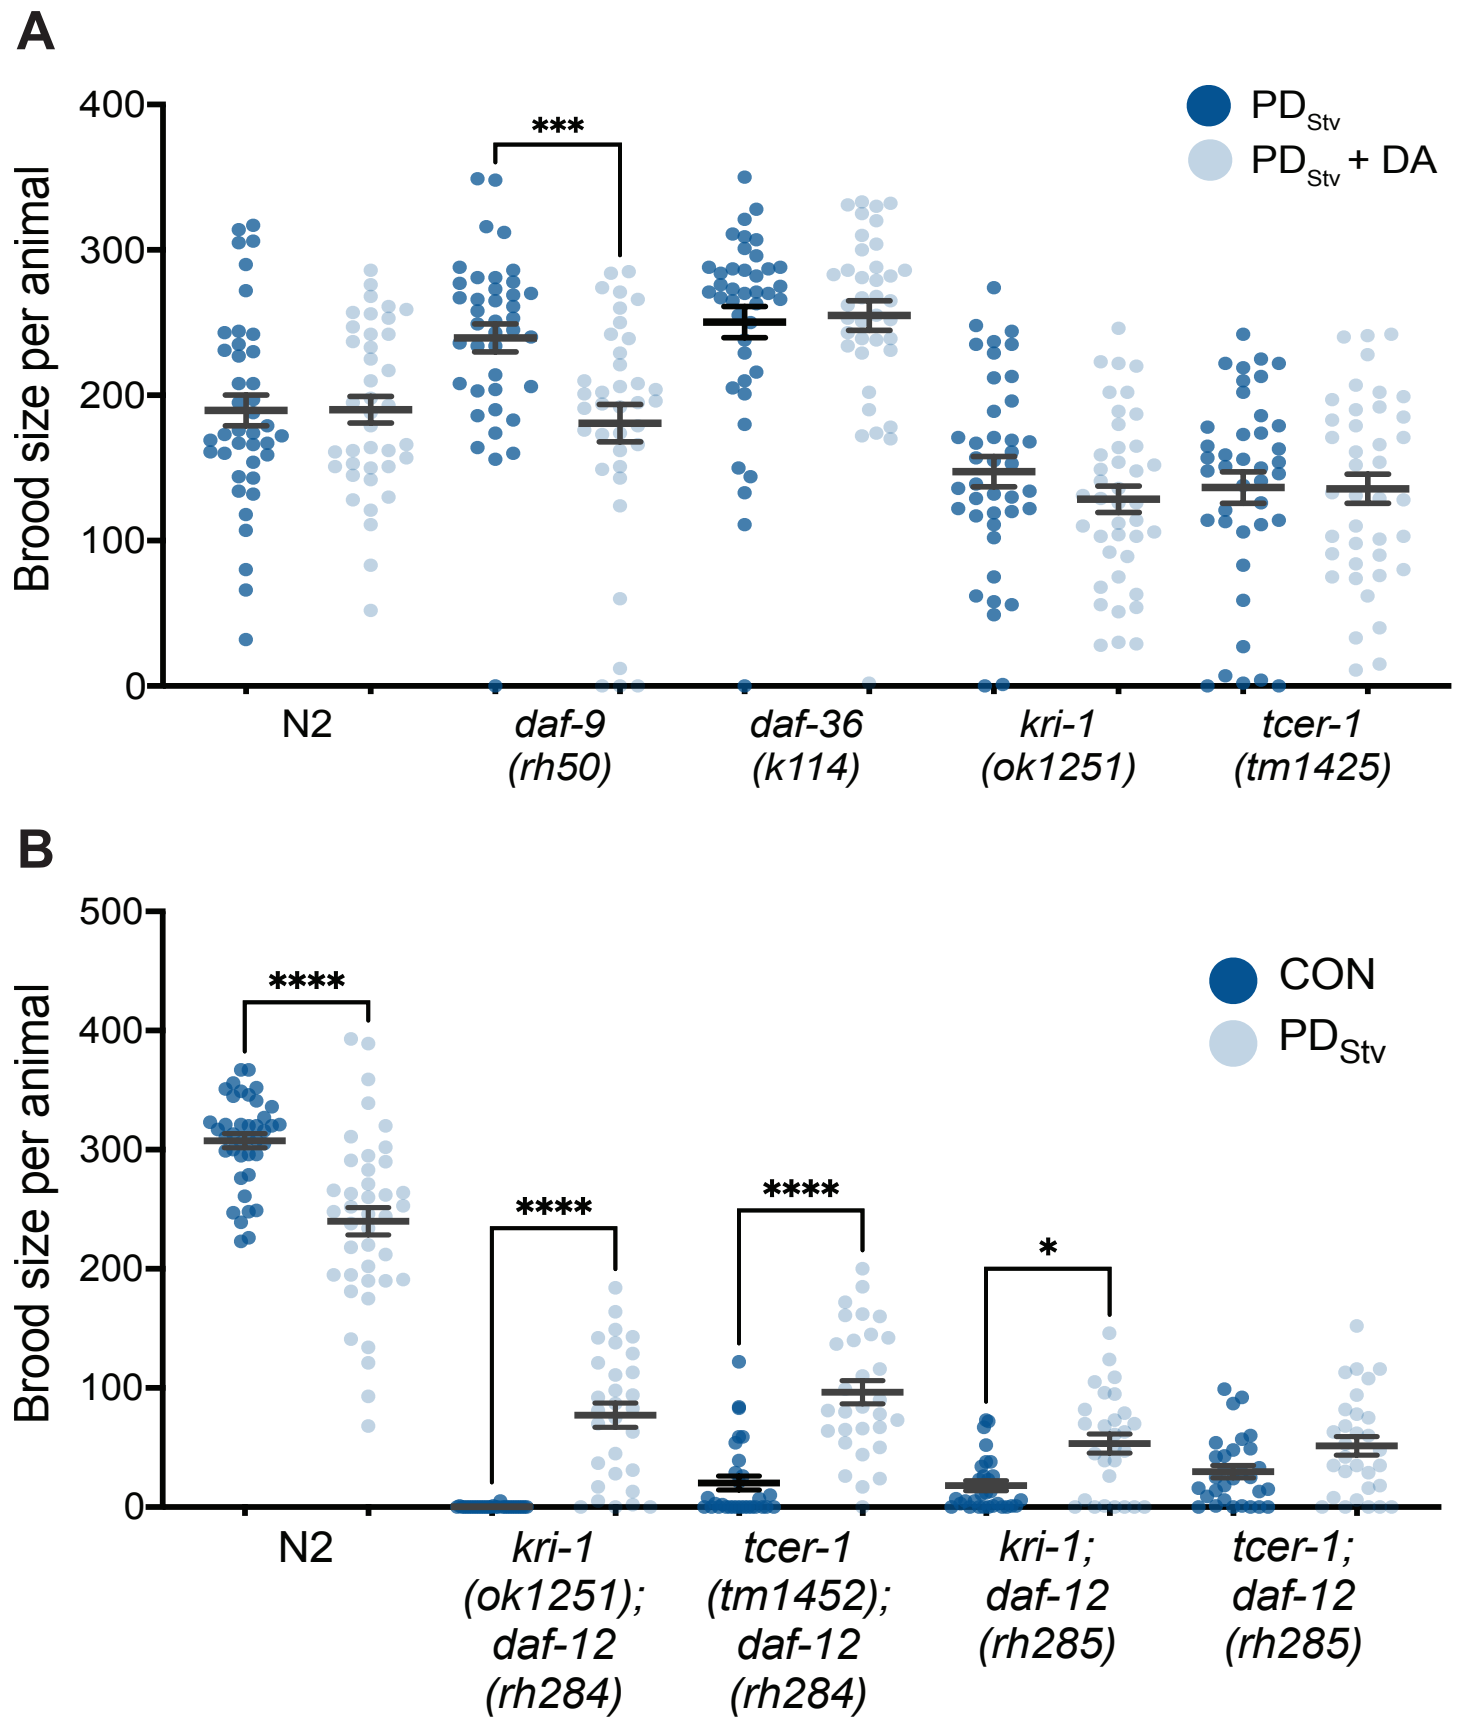

Supplement: supp [file elife-61459-supp-v1.zip › elife_poa_e61459_Figure_1_figure_supplement_1.pdf]

Figure 3- figure supplement 1

**A**

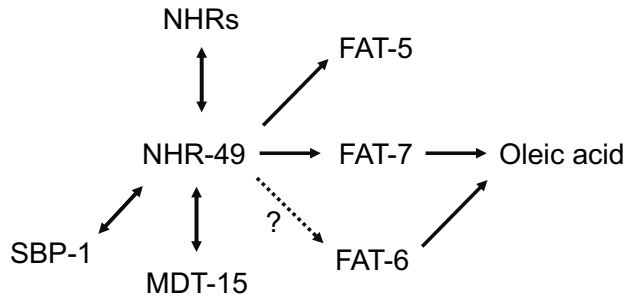

**B**

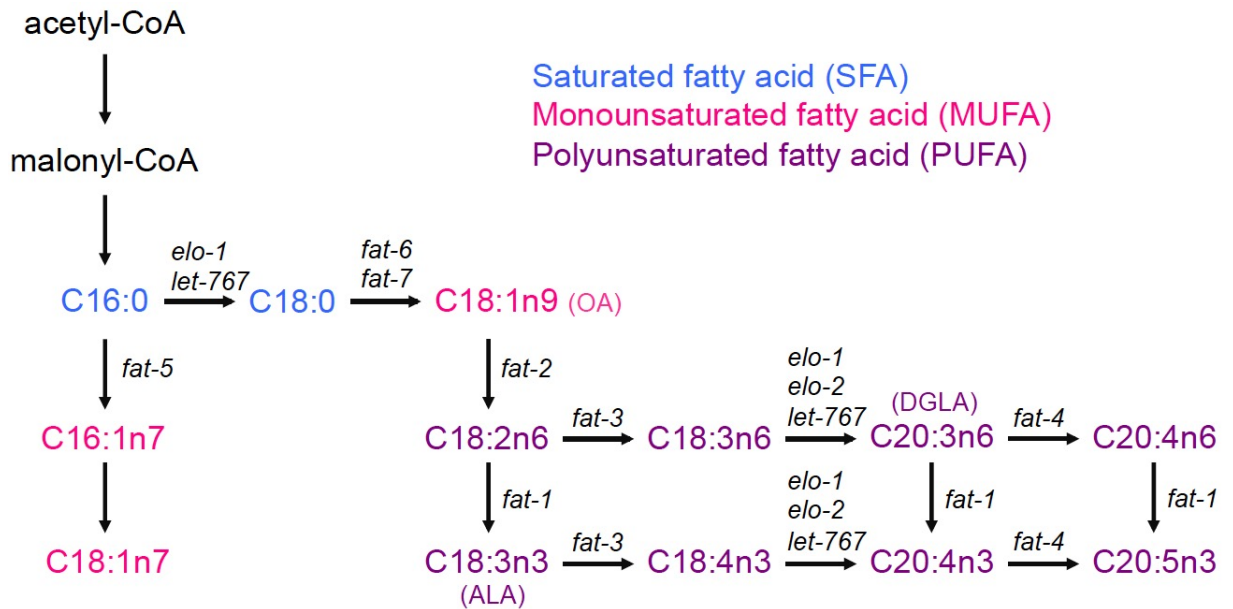

Supplement: supp [file elife-61459-supp-v1.zip › elife_poa_e61459_Figure_3_figure_supplement_1.pdf]

Figure 5-figure supplement 3

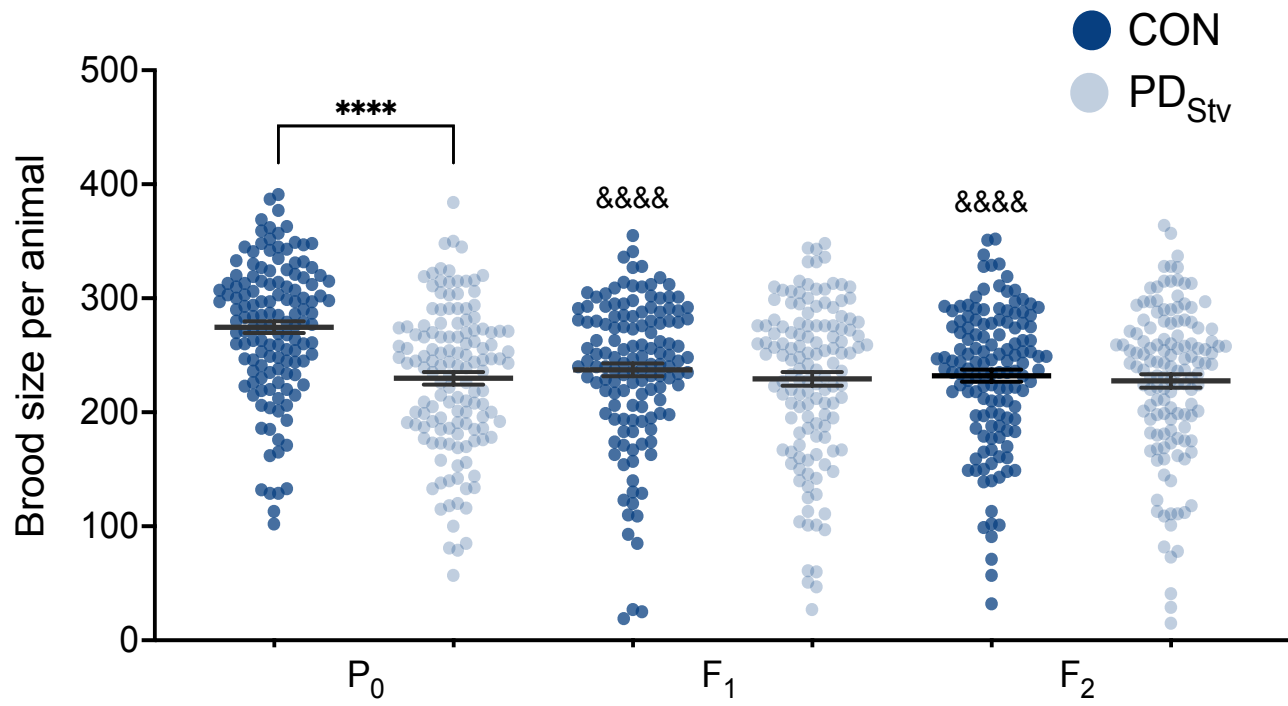

Supplement: supp [file elife-61459-supp-v1.zip › elife_poa_e61459_Figure_5_figure_supplement_3.pdf]

Figure 6-figure supplement 1

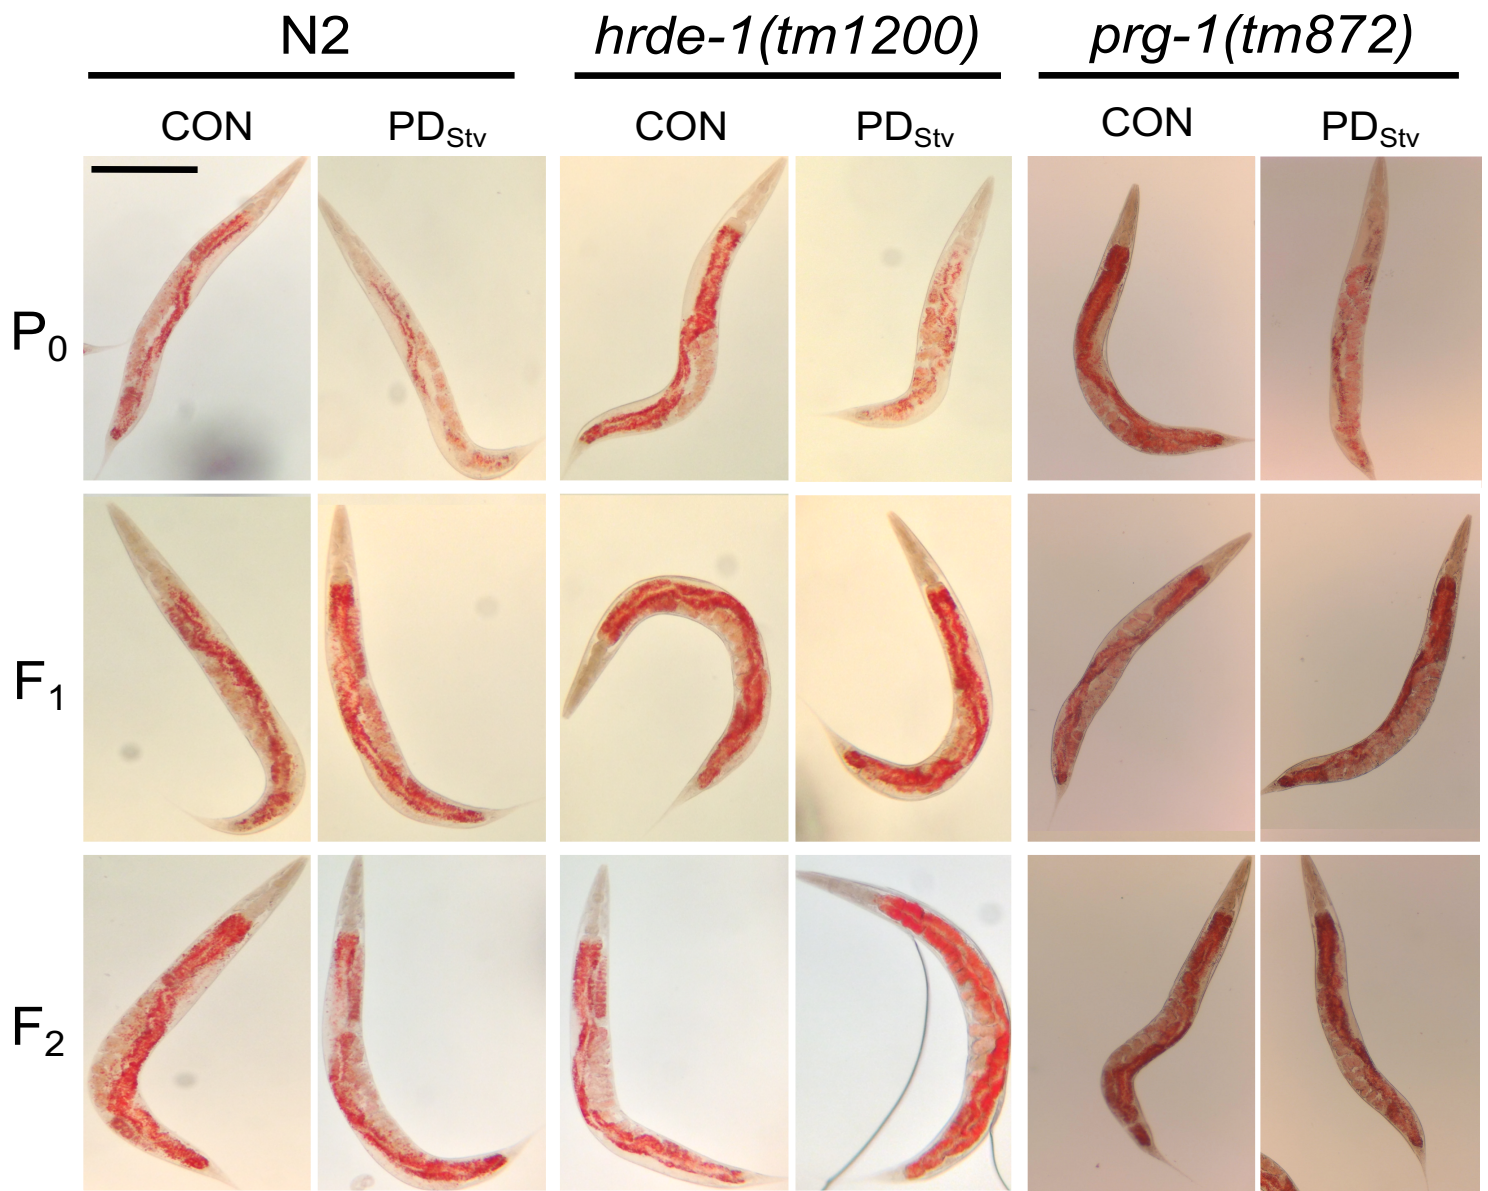

Supplement: supp [file elife-61459-supp-v1.zip › elife_poa_e61459_Figure_6_figure_supplement_1.pdf]

Figure 7- figure supplement 1

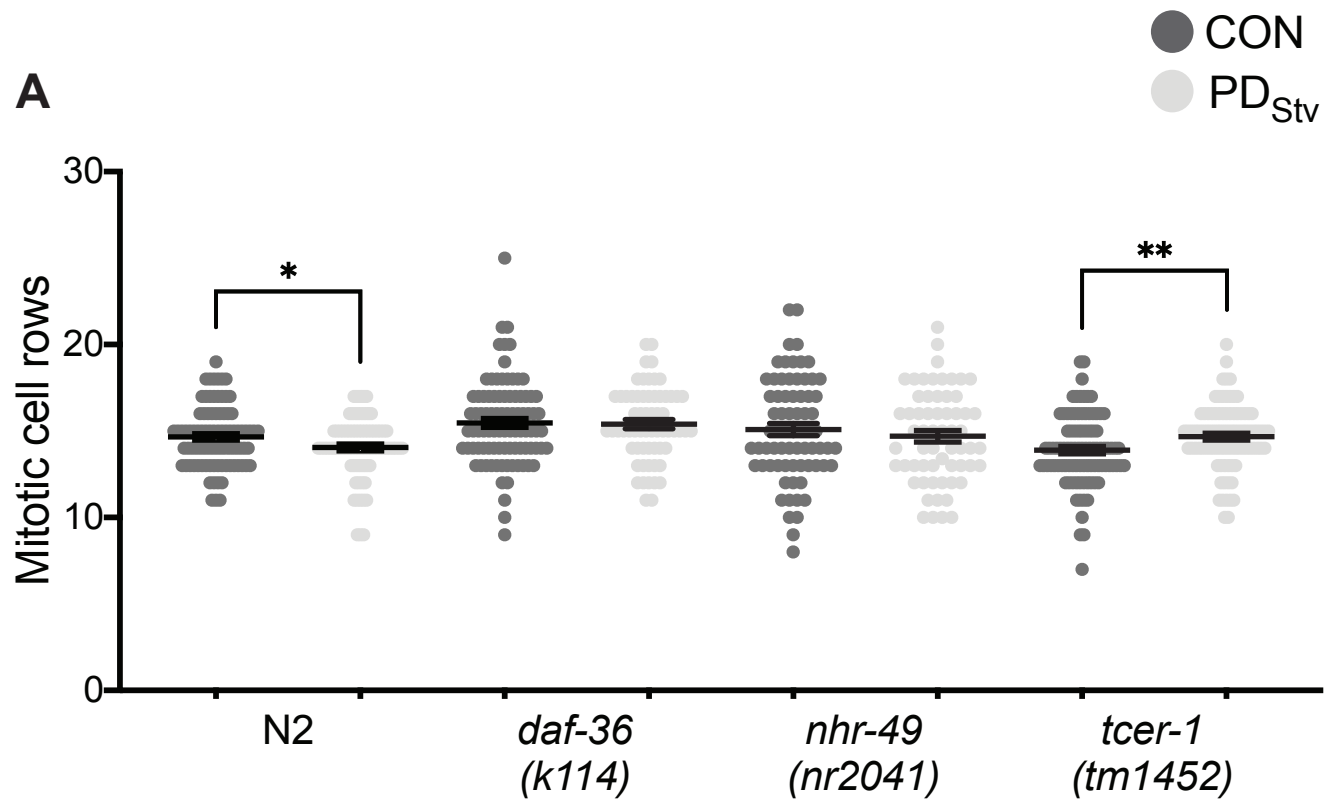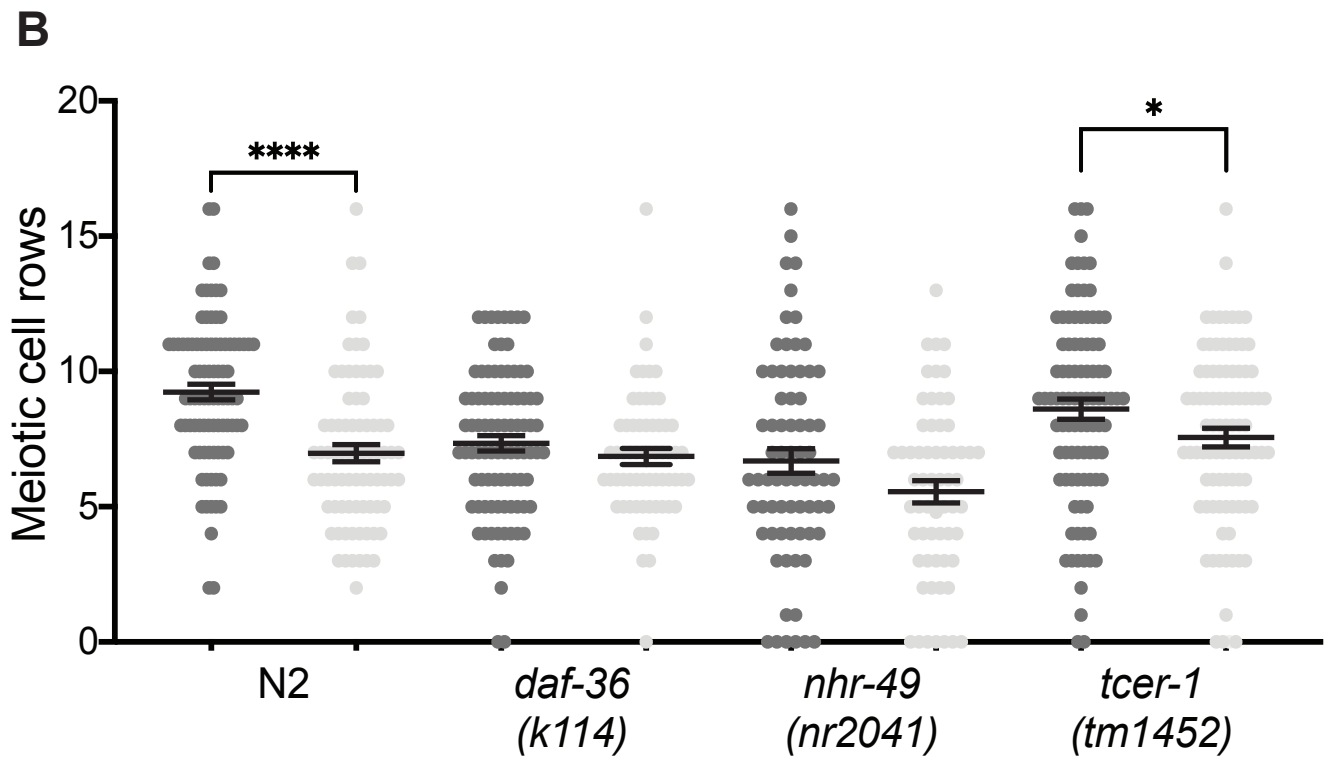

Supplement: supp [file elife-61459-supp-v1.zip › elife_poa_e61459_Figure_7_figure_supplement_1.pdf]

Appendix 1-figure 3

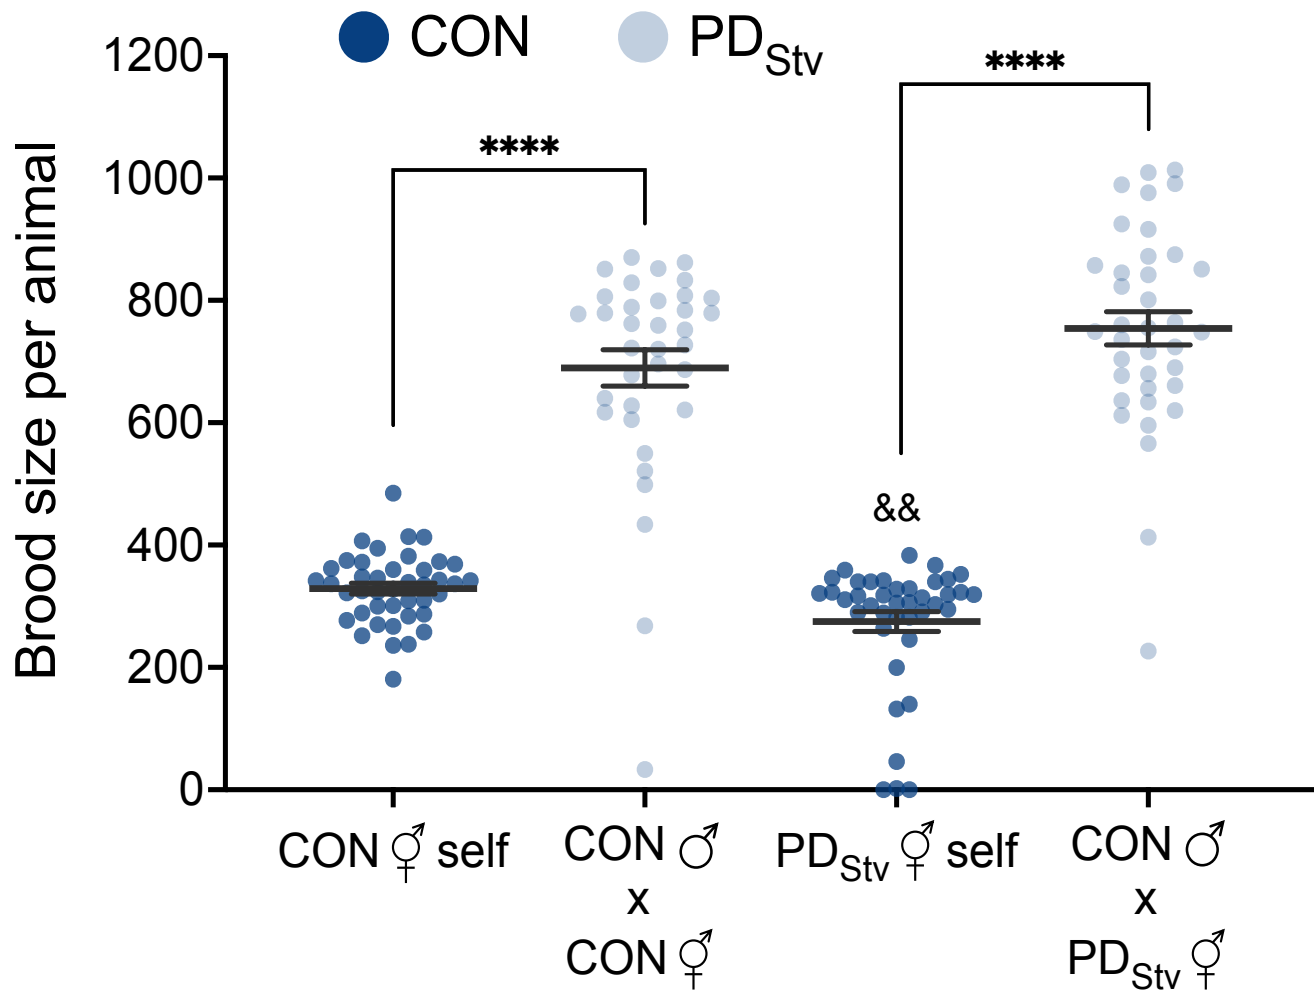

Supplement: supp [file elife-61459-supp-v1.zip › elife_poa_e61459_Appendix_1_figure_3.pdf]
